# Supplementary material
Source: PubMed Central journal article supplement (PMC4382238)
Supplement: JCI76012sd.pdf [file JCI76012sd.pdf]

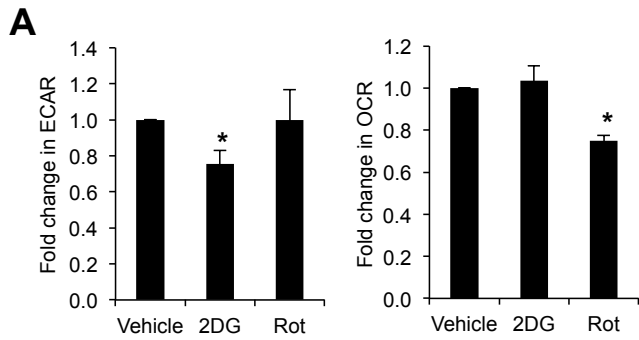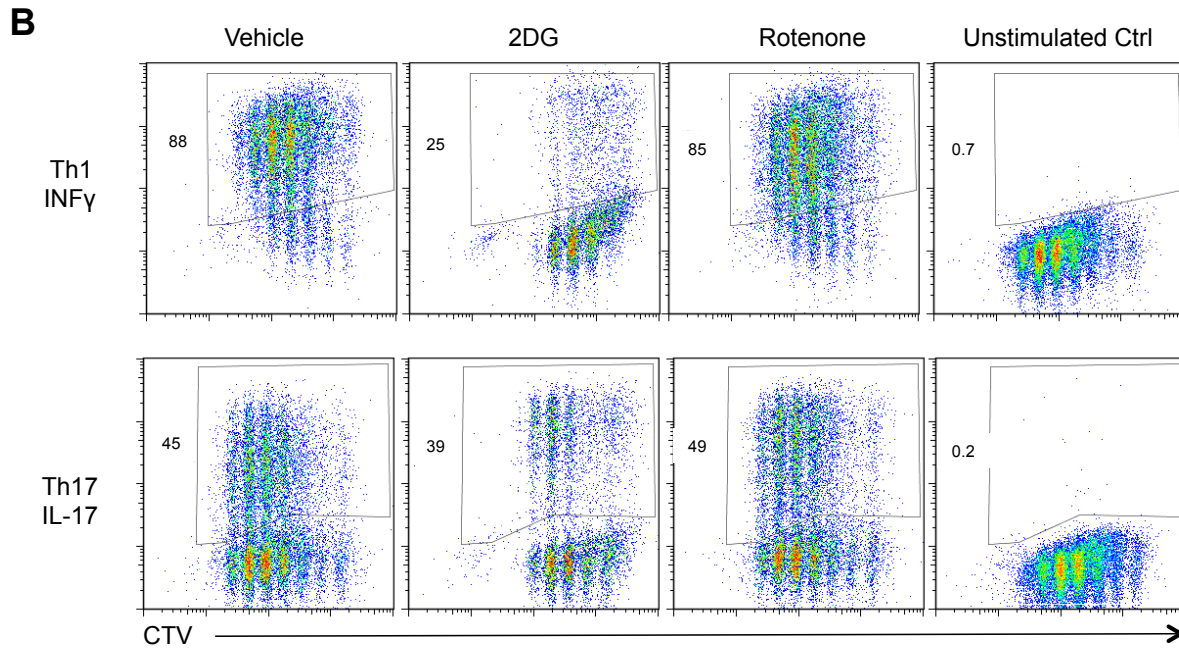

**Supplemental Figure 1. Moderate metabolic inhibition impacts Teff proliferation and function.**

(A) CD4<sup>+</sup>CD25<sup>-</sup> T cells were polarized in vitro for 3 days, split 1:2 and cultured with IL-2 alone for an additional 2 days to generate Th17 cells. The rate of extracellular acidification (ECAR) and oxygen consumption (OCR) was assessed following injection of 2DG and rotenone. (B) CD4<sup>+</sup>CD25<sup>-</sup> T cells were labeled with CellTrace Violet (CTV) and polarized in vitro for 3 days, split 1:2 and cultured with IL-2 alone for an additional 2 days to generate Th1, Th17 or Treg cells. Cells were treated with 250 $\mu$ M 2-deoxyglucose (2DG) or 5nM rotenone and proliferation was assessed by CTV dilution and intracellular cytokine staining for IFN $\gamma$  (Th1) or IL-17 (Th17) was performed after 72 hours. Data is shown as mean  $\pm$  SD of triplicate samples (A) and all data are representative of 3 independent experiments. \* indicates  $p < 0.05$ .

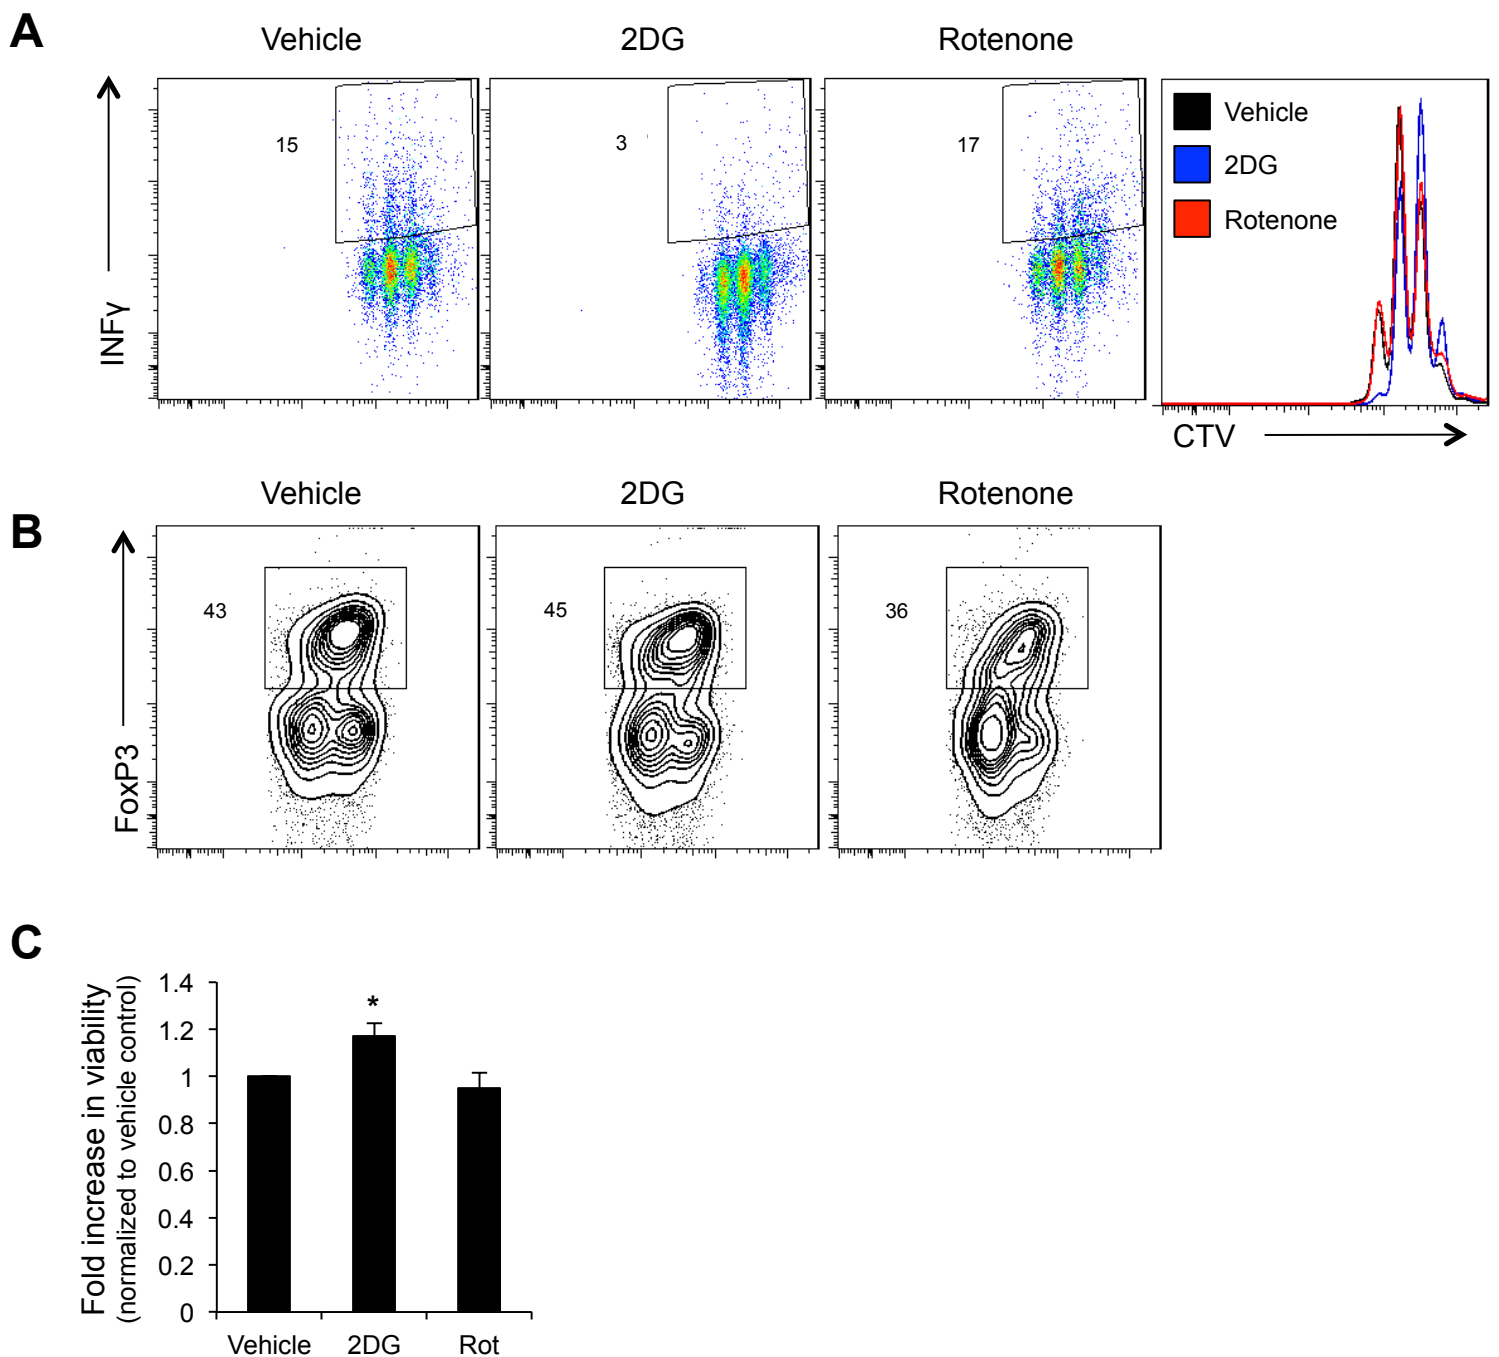

**Supplemental Figure 2. Inhibition of different metabolic pathways selectively impacts T cell cytokine production and FoxP3<sup>+</sup> natural Tregs.**

(A) CD4<sup>+</sup>CD25<sup>-</sup> T cells were labeled with CellTrace Violet (CTV) and activated in the presence of 250 $\mu$ M 2-deoxyglucose (2DG) or 5nM rotenone. Proliferation was assessed by CTV dilution and intracellular cytokine staining for IFN $\gamma$  was performed after 72 hours. (B, C) CD4<sup>+</sup>CD25<sup>+</sup> natural Treg cells were labeled with CellTrace Violet (CTV) and activated in the presence of 250 $\mu$ M 2-deoxyglucose (2DG) or 5nM rotenone. (B) Transcription factor staining for FoxP3 was performed after 72 hours and (C) cell viability was determined by propidium iodide exclusion. Data is shown as mean  $\pm$  SD of triplicate samples (C) and all data are representative of 2 independent experiments. \* indicates  $p < 0.05$ .

**A**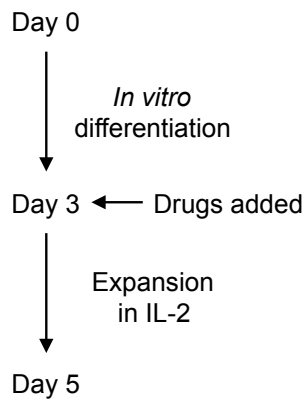**B**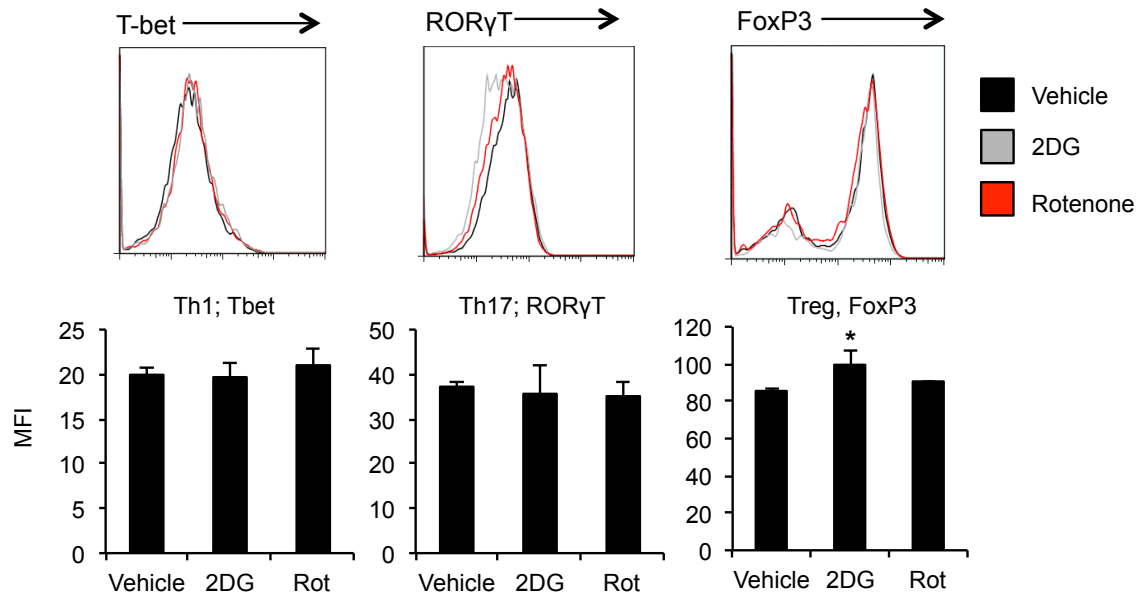**C**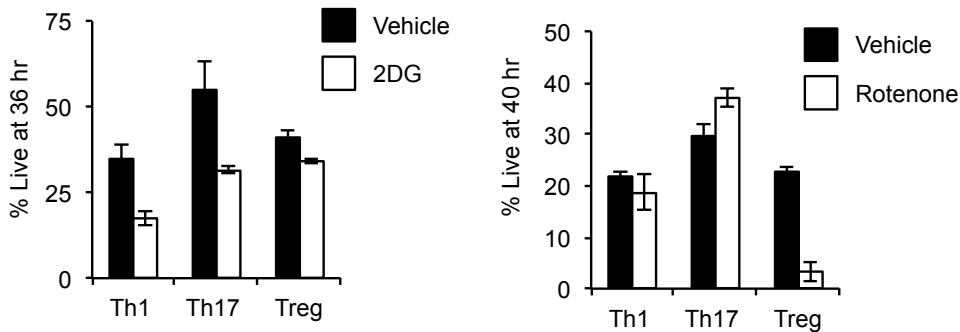

### Supplemental Figure 3. Inhibition of different metabolic pathways selectively impacts established Teff or Treg survival.

(A) Schematic of drug treatments for (B). (B) CD4<sup>+</sup>CD25<sup>-</sup> T cells polarized *in vitro* for 3 days to generate Th1, Th17 or Treg cells. Cells were then treated with 250 $\mu$ M 2-deoxyglucose (2DG) or 5nM rotenone and cultured for an additional 2 days in IL-2 alone. Transcription factor staining was determined by flow cytometry. (C) CD4<sup>+</sup>CD25<sup>-</sup> T cells were polarized *in vitro* for 3 days, split 1:2 and cultured with IL-2 alone for an additional 2 days and then incubated with 250 $\mu$ M 2DG or 5nM rotenone and survival was determined by propidium iodide exclusion. Data is shown as mean  $\pm$  SD of triplicate samples and data are representative of 2 (B) or 3 (C) independent experiments. \* indicates  $p < 0.05$ .

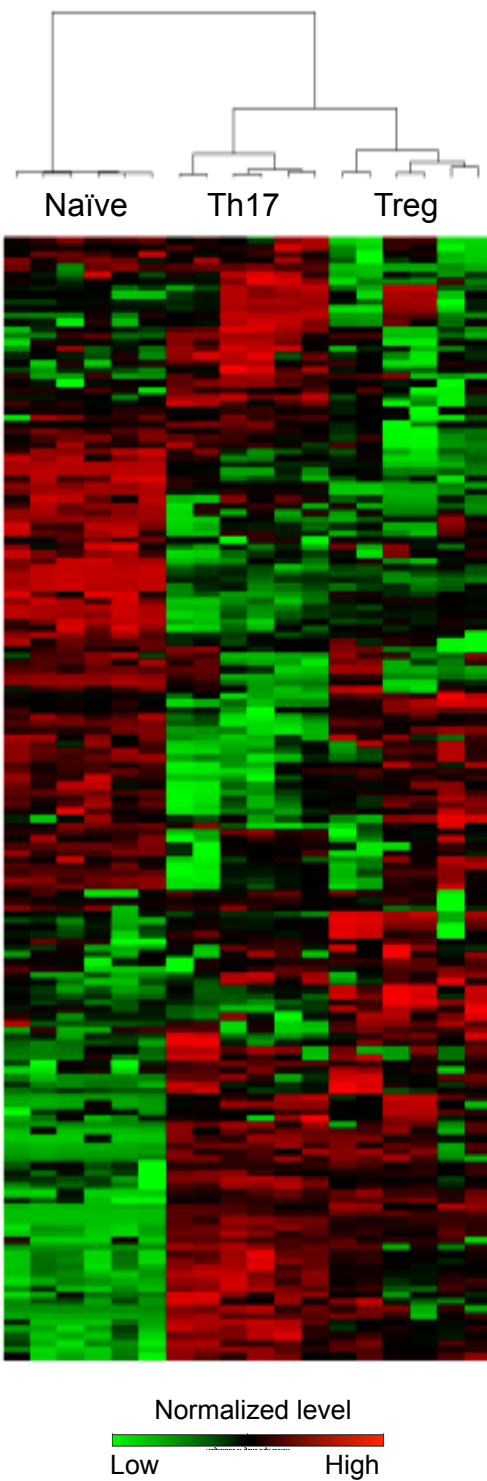

#### Supplemental Figure 4. CD4 T cell subsets have distinct metabolic profiles

CD4<sup>+</sup>CD25<sup>-</sup> T cells were polarized in vitro for 3 days, split 1:2 and cultured with IL-2 alone for an additional 2 days to generate Th1, Th17 or Treg cells. T cell subset lysates from 6 replicate samples were extracted and split into equal parts for analysis on GC/MS and LC/MS/MS platforms for determination of cellular metabolites. A heat map with relative levels of each metabolite and unsupervised hierarchical clustering is shown.

**A**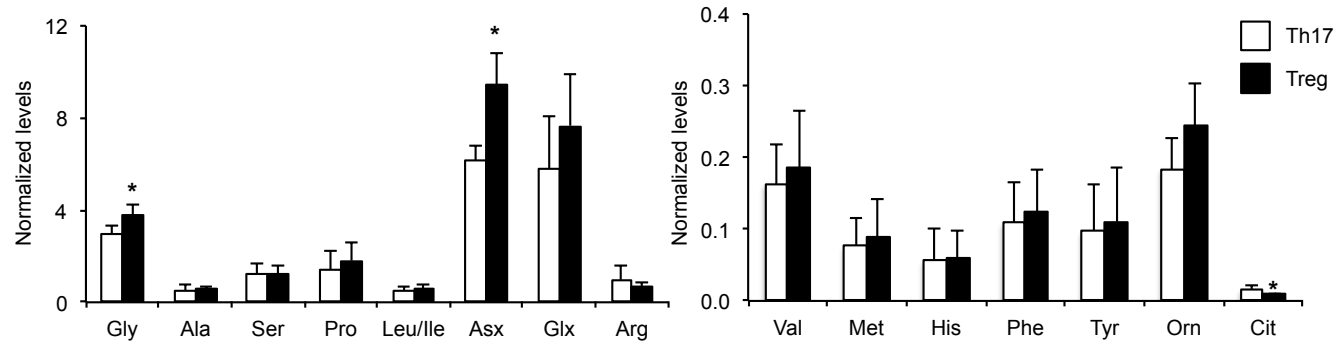**B**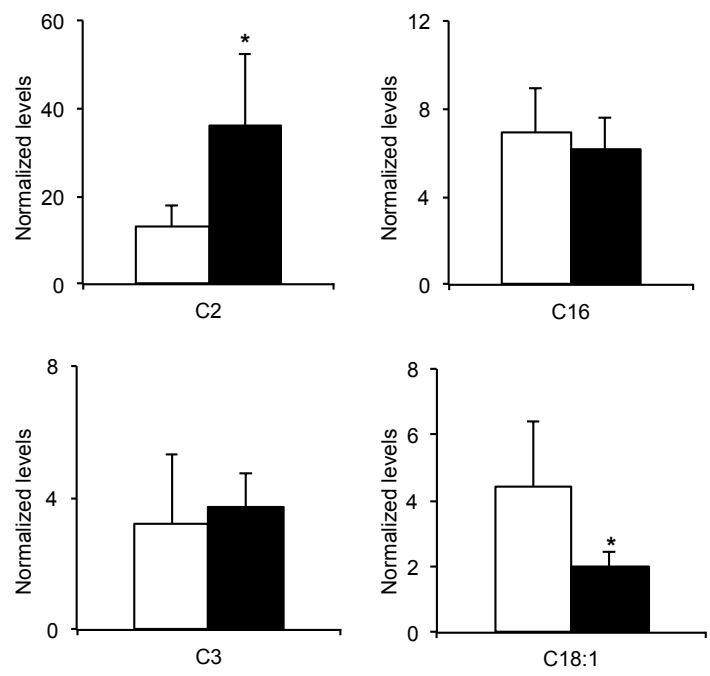**C**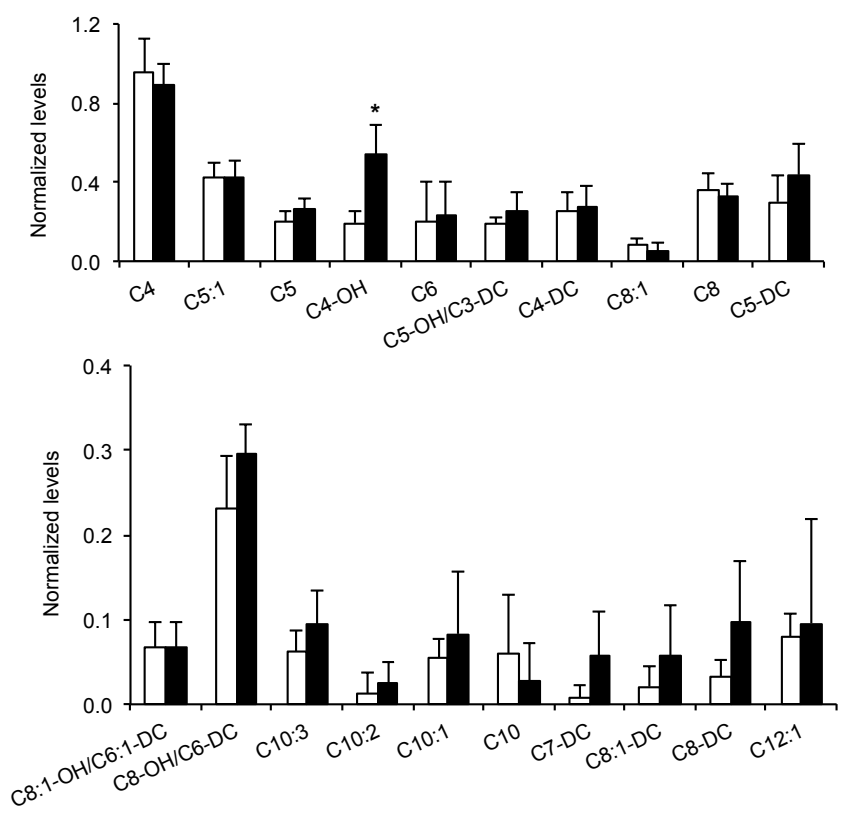

**Supplemental Figure 5. CD4 T cell subsets have different acyl-carnitine and amino acid profiles.**

CD4<sup>+</sup>CD25<sup>-</sup> T cells were polarized in vitro for 3 days, split 1:2 and cultured with IL-2 alone for an additional 2 days to generate Th17 or Treg cells. T cell subset lysates were extracted and GC/MS was performed to determine relative levels of cellular metabolites. Relative levels of (A) amino acids and (B, C) acyl carnitines are shown. Data is shown as mean ± SD of triplicate samples and represents 2 independent experiments. \* indicates p < 0.05.

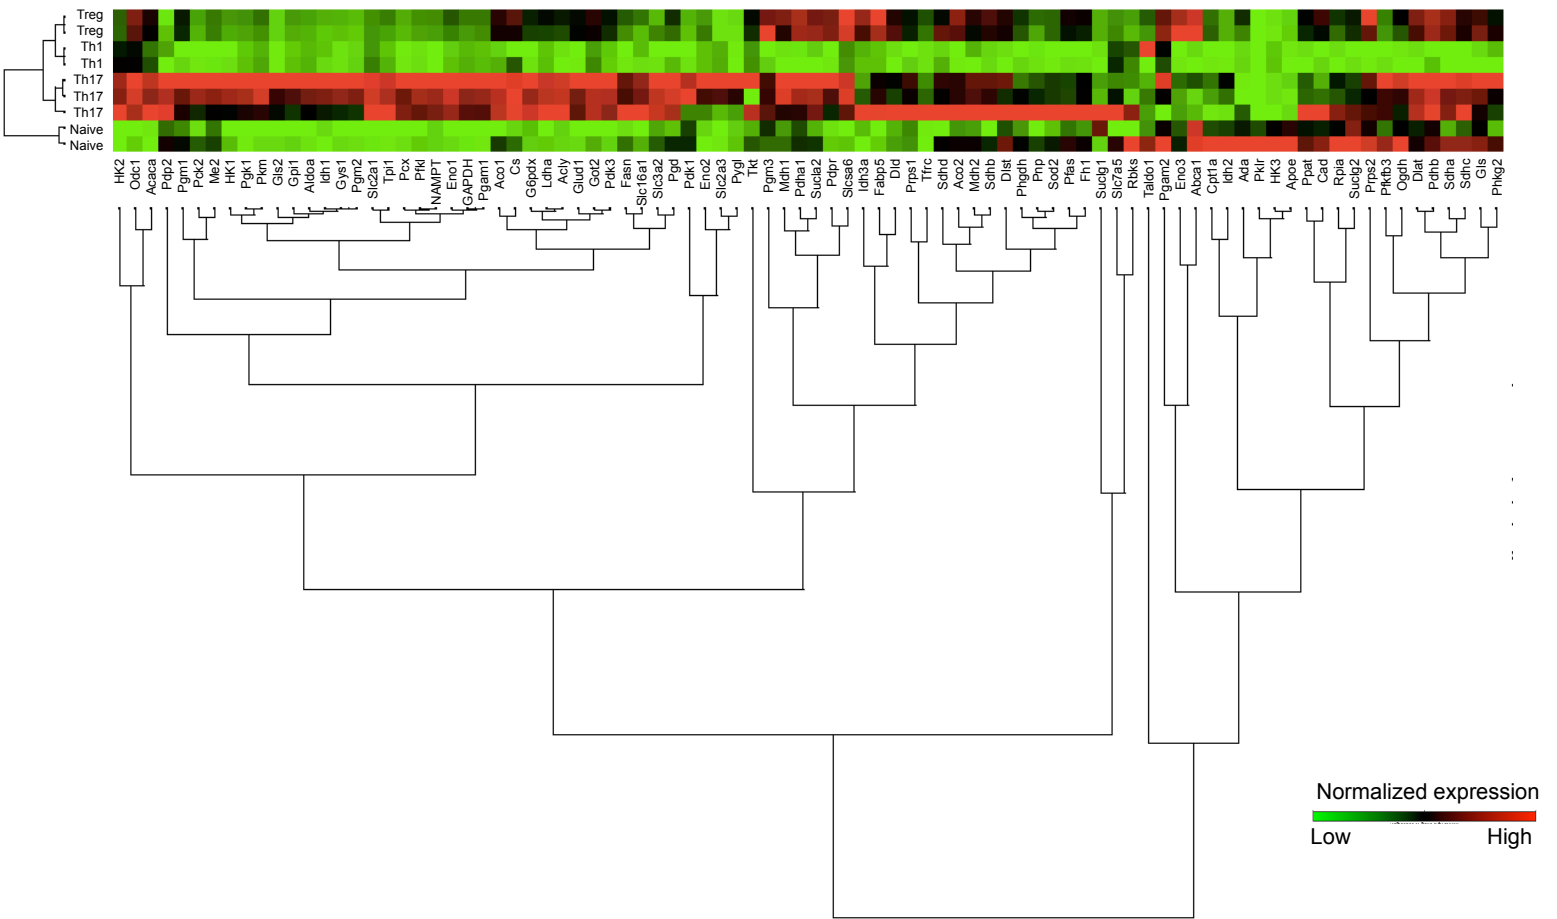

**Supplemental Figure 6. Profiling of metabolic gene expression in Th17 and Treg.**

CD4<sup>+</sup>CD25<sup>-</sup> T cells were polarized in vitro for 3 days, split 1:2 and cultured with IL-2 alone for an additional 2 days to generate Th1, Th17 or Treg cells for real-time PCR using a custom PCR array. A heatmap is shown with relative levels of each metabolite using unsupervised hierarchical clustering. Data is representative of 2 independent experiments.

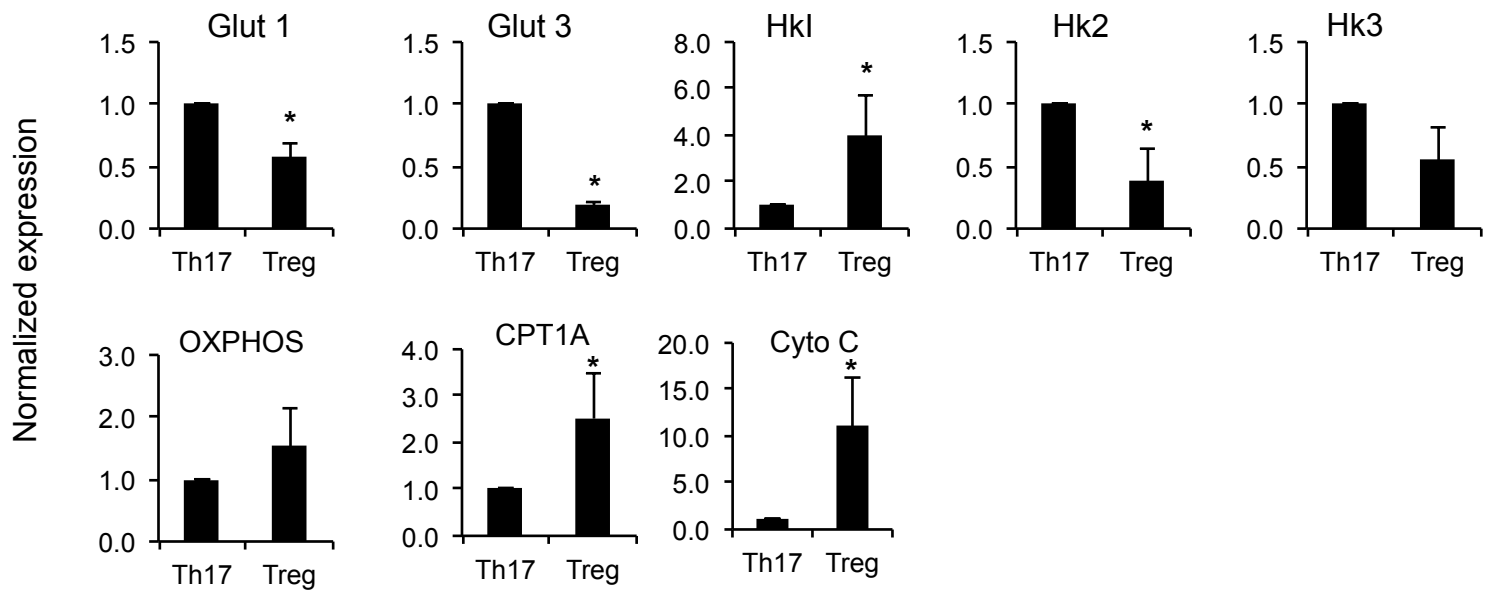

**Supplemental Figure 7. CD4 T cell subsets have different expression patterns of metabolic proteins.**

CD4<sup>+</sup>CD25<sup>-</sup> T cells were polarized in vitro for 3 days, split 1:2 and cultured with IL-2 alone for an additional 2 days to generate Th17 or Treg cells for immunoblot. Data is shown as mean  $\pm$  SD of 2 (HK3), 3 (Glut1, Glut3, HK1, HK2, OxPhos), 4 (Cyto C), or 5 (CPT1a) independent experiments. \* indicates  $p < 0.05$ .

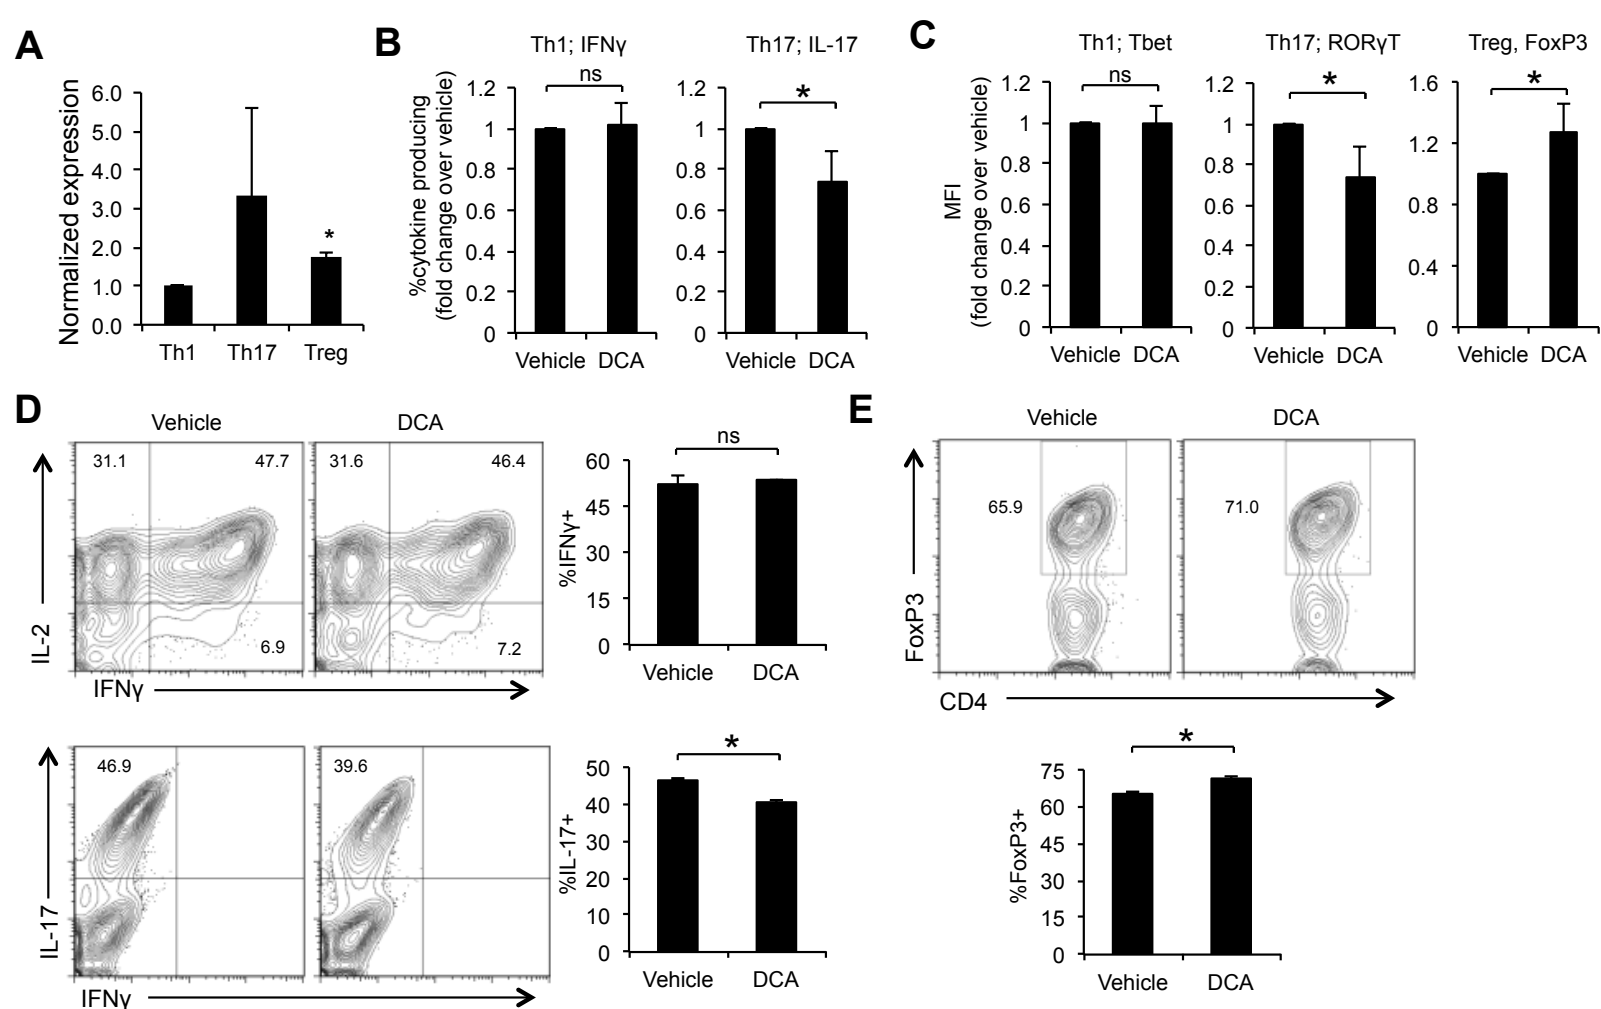

**Supplemental Figure 8. Inhibition of PDHK selectively impacts T cell differentiation.**

CD4<sup>+</sup>CD25<sup>-</sup> T cells were polarized in vitro for 3 days, split 1:2 and cultured with IL-2 alone for an additional 2 days to generate Th1, Th17 or Treg cells for (A) quantitation of mean  $\pm$  SD of PDHK1 immunoblots from 4 independent experiments. (B, C) Cells were treated with 10mM dichloroacetate (DCA) on Day 0 and then (B) cytokine production and (C) transcription factor staining were determined by flow cytometry on Day 5. (D, E) T cells were polarized for 3 days and treated with DCA on Day 3 for 2 days in the presence of IL-2 alone. (D) Cytokine production and (E) FoxP3 expression were determined by flow cytometry. Data is shown as mean  $\pm$  SD and all data are representative of at least 2 independent experiments. \* indicates  $p < 0.05$ .



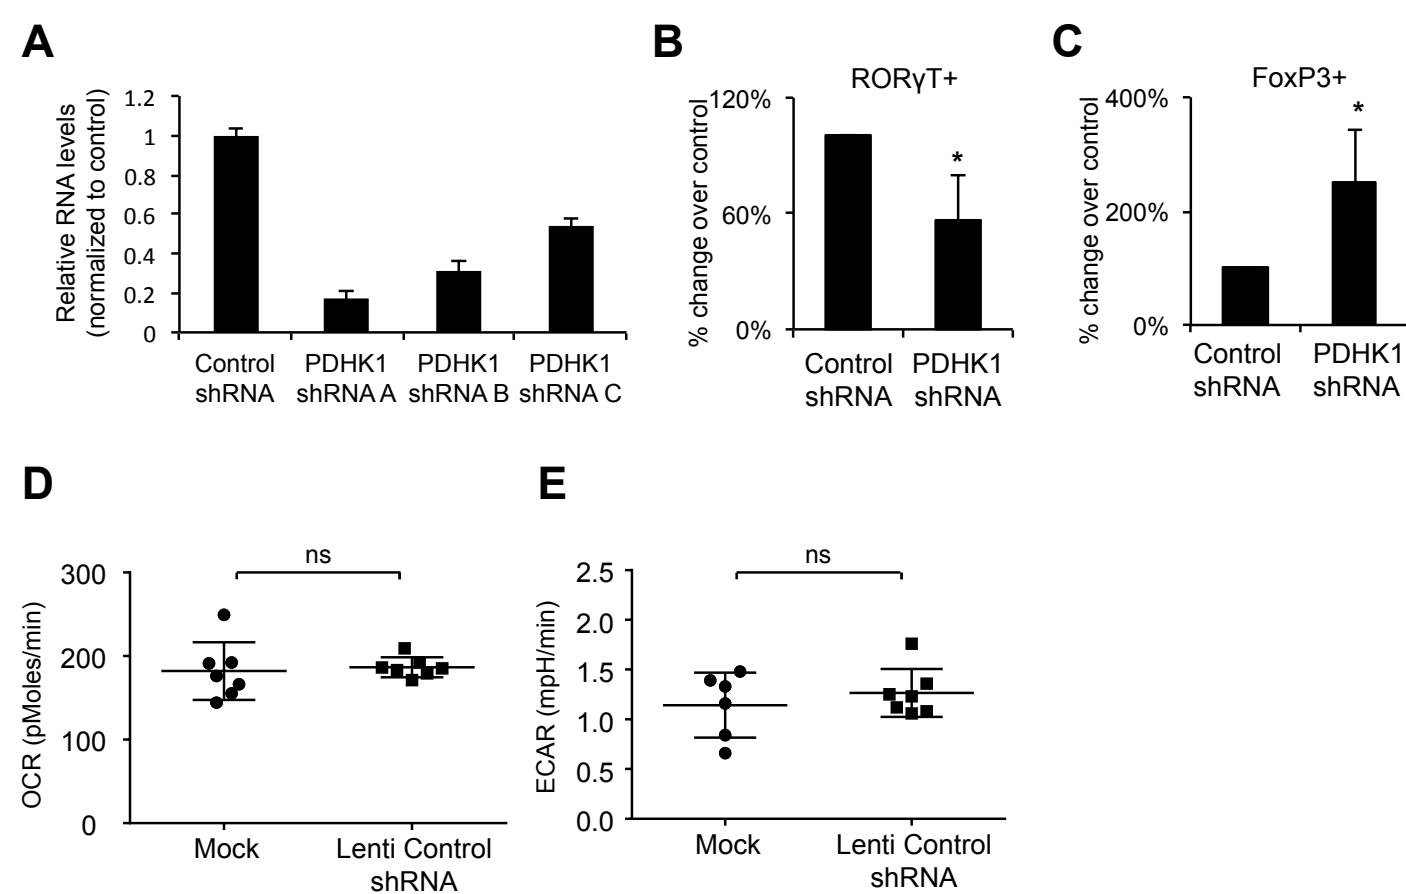

**Supplemental Figure 9. Knockdown of PDHK1 inhibits proliferation and cytokine production in Th17.**

(A) CD4<sup>+</sup>CD25<sup>-</sup> T cells were polarized in vitro for 3 days, split 1:2 and cultured with IL-2 alone for an additional 2 days to generate Th1, Th17 or Treg cells for immunoblot. (B-F) CD4 T cells were activated and infected with lentiviruses expressing PDHK1 shRNA and (B) qRT-PCR for *Pdhk1* is shown. (C, D) CD4<sup>+</sup> T cells were polarized and infected with lentiviruses expressing PDHK1 shRNA 24 hours post activation. After 72 hours, transcription factor staining was assessed by flow cytometry. (E, F) Extracellular flux analyses of mock and control lentivirus-infected CD4 T cells. Data is shown as mean  $\pm$  SD and all data are representative of at least 2 independent experiments. \* indicates  $p < 0.05$ .

**A**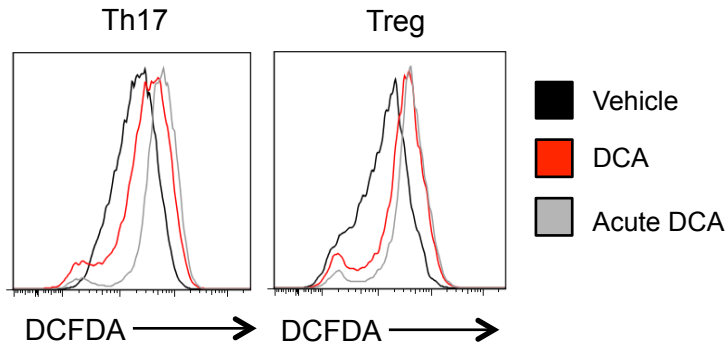**B**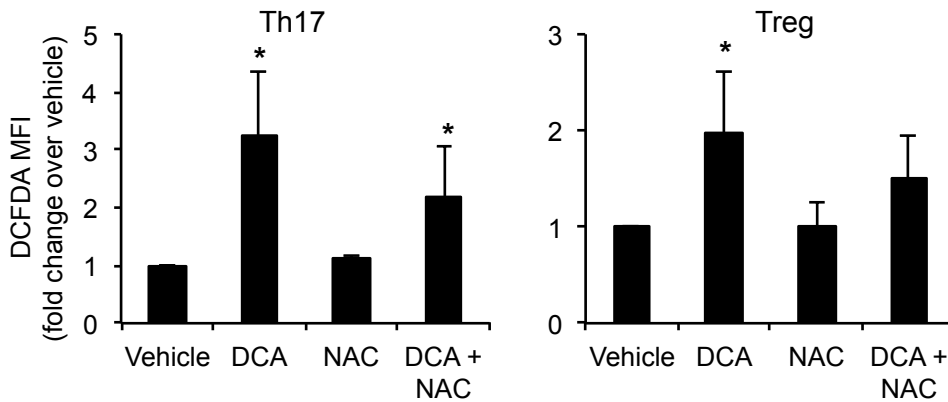

**Supplemental Figure 10. DCA promotes ROS production that can be rescued with N-acetyl cysteine addition.**

CD4<sup>+</sup>CD25<sup>-</sup> T cells were polarized in vitro for 3 days, split 1:2 and cultured with IL-2 alone for an additional 2 days to generate Th17 or Treg cells. **(A)** Cells were treated with vehicle (black) or DCA on Day 0 (red) or treated acutely with DCA for 30 minutes prior to flow cytometric analysis (gray). ROS production was measured by flow cytometry using the indicator dye DCFDA. **(B)** Th17 and Treg cells were treated with 10mM DCA, 1mM N-acetyl cysteine (N-AC) or both in combination and ROS production was measured by flow cytometry using the indicator dye DCFDA. Data is shown as mean ± SD **(B)** and all data are representative of at least 2 independent experiments. \* indicates  $p < 0.05$ .

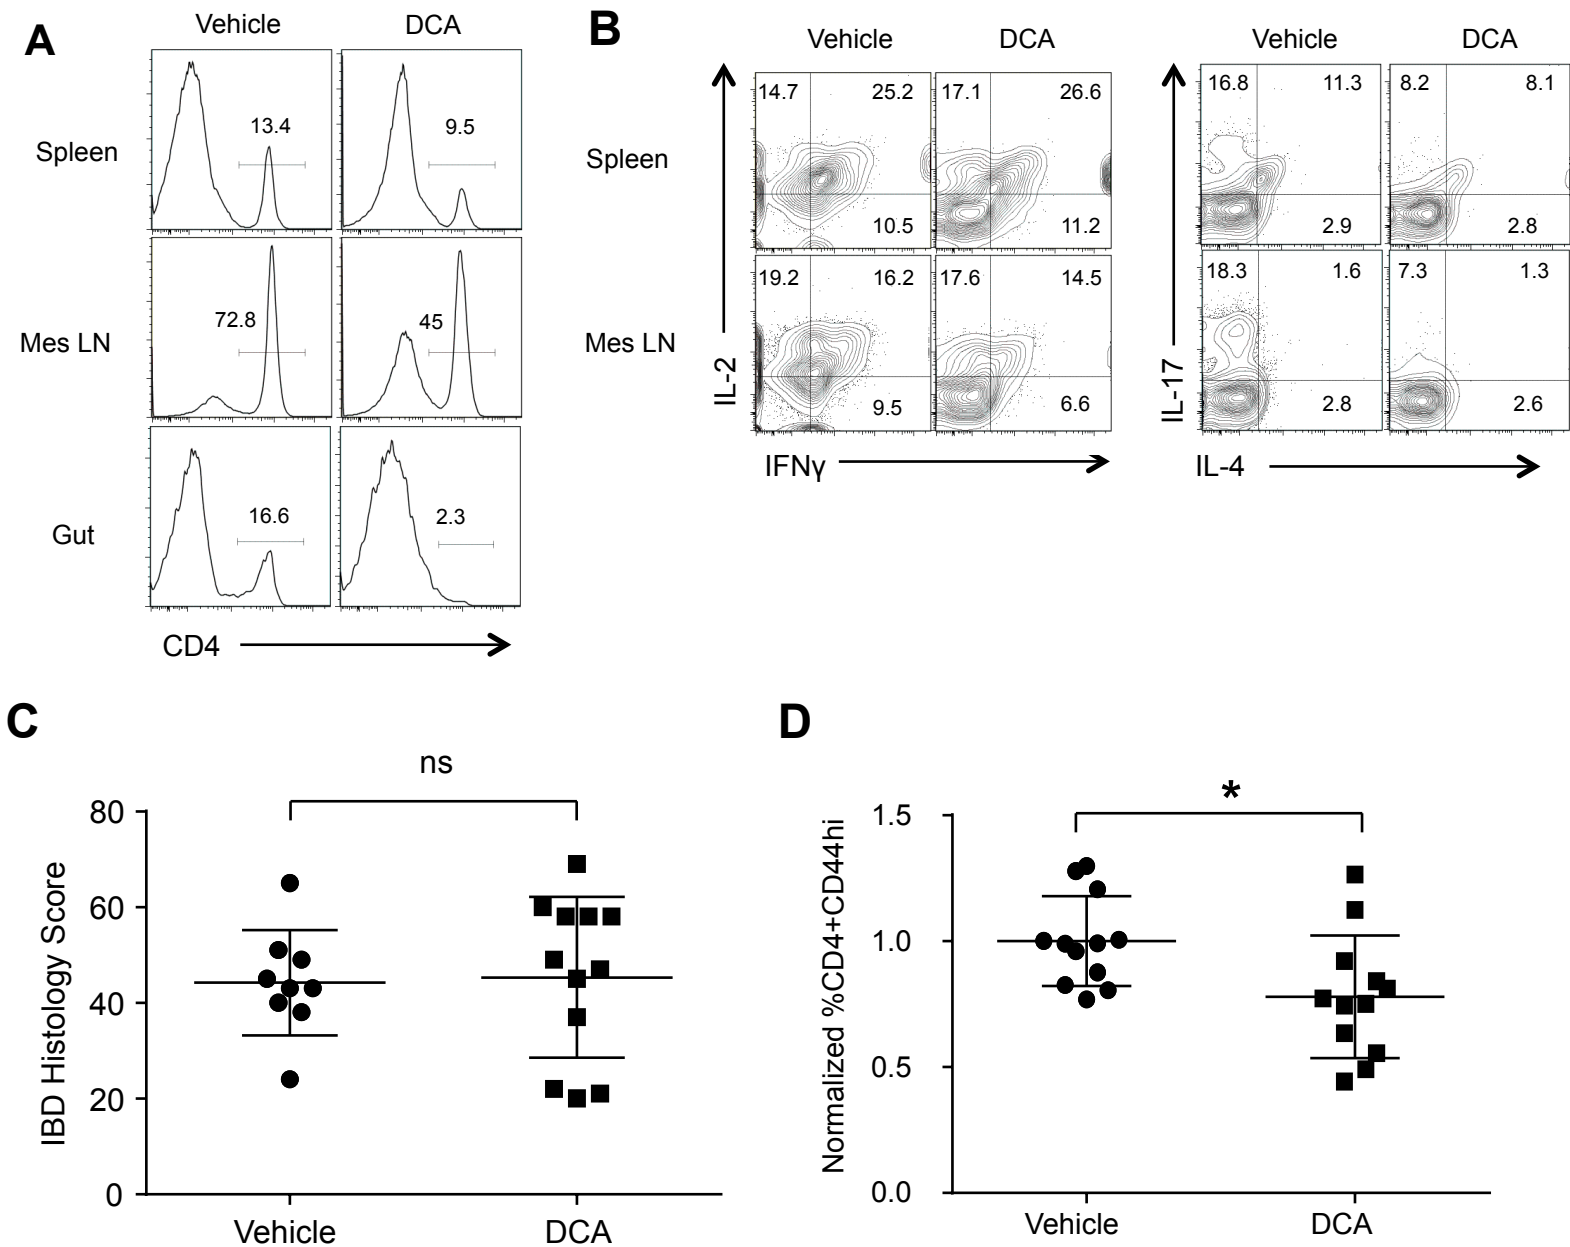

**Supplemental Figure 11. DCA inhibits T cell cytokine production in inflammatory disease.**

RAG1<sup>-/-</sup> mice were injected with naïve effector (CD4<sup>+</sup>CD25<sup>-</sup>CD45RB<sup>hi</sup>) T cells and colitis was induced. Mice were given 2g/L of dichloroacetate (DCA, n=10) or vehicle (n=10) in the drinking water for the duration of the experiment. **(A)** The percentage of CD4 T cells in the spleen, mesenteric lymph nodes and gut or **(B)** the percentage of IL-17 or IFN $\gamma$  producing cells in the spleen and mesenteric lymph nodes was determined using flow cytometry. **(C)** Tissues were fixed and a board-certified pathologist blindly scored the severity of colonic inflammation in H&E stained sections. Histology scores are shown for vehicle and DCA-treated mice. **(D)** EAE was induced in wildtype mice with or without DCA treatment and the percentage of CD4<sup>+</sup>CD44<sup>+</sup> T cells in the draining lymph nodes on day 9 were determined using flow cytometry. Data is representative of 3 independent experiments. \* indicates p < 0.05.

Supplemental Table 1. Metabolomics of CD4 T cell subsets for Figure 4

| ID                             | Naïve A     | Naïve B     | Naïve C     | Th1 A       | Th1 B       | Th1 C       | Th17 A      | Th17 B      | Th17 C      | Treg A      | Treg B      | Treg C      | HMDB       |
|--------------------------------|-------------|-------------|-------------|-------------|-------------|-------------|-------------|-------------|-------------|-------------|-------------|-------------|------------|
| 2-aminoacrylic acid            | 669128.7108 | 493271.3893 | 648664.1429 | 977376.181  | 957370.5322 | 918600.7274 | 884851.0823 | 777339.6404 | 668081.1862 | 633839.4351 | 682471.2671 | 651840.6853 | HMDB03609  |
| L-serine                       | 3069254.596 | 2407223.607 | 3389725.919 | 4282681.539 | 3841893.629 | 3888529.466 | 2944176.88  | 2620085.923 | 3101792.272 | 2522982.447 | 2892657.585 | 2983800.397 | HMDB00187  |
| N-Methylethanolamine phosphate | 61803.0262  | 94810.25555 | 96717.32645 | 233273.4801 | 291230.8802 | 341815.8754 | 442889.3851 | 493266.996  | 316365.4373 | 799071.1876 | 931761.348  | 855287.0614 | NA         |
| cytosine                       | 630783.6182 | 370677.7603 | 775221.9289 | 1146104.772 | 706523.0291 | 678399.3297 | 666843.4492 | 503751.3745 | 980213.6938 | 416386.2088 | 612419.2792 | 503091.7555 | HMDB00630  |
| creatinine                     | 39441340.09 | 31811989.53 | 46904309.19 | 67721143.1  | 37590370.22 | 37260146.36 | 35747377.04 | 31169201.25 | 40570005.76 | 30318000.83 | 31977089.32 | 32029164.85 | HMDB00562  |
| creatine                       | 17475551.04 | 13365360.54 | 15326411.19 | 49737460.52 | 83258278.03 | 86284959.87 | 134850185.6 | 137098508.4 | 146063143.3 | 30329910.97 | 30777672.21 | 31615225.81 | HMDB00064  |
| Phosphodimethylethanolamine    | 58679.1227  | 75331.6661  | 61079.64025 | 242571.6503 | 411740.2357 | 517569.842  | 681958.6766 | 953394.7837 | 798238.3171 | 318533.17   | 361099.5221 | 316239.8616 | HMDB060244 |
| 56-dihydrothymine              | 690279.6983 | 528462.4234 | 804530.8308 | 1704234.273 | 1826112.263 | 1764073.249 | 2256655.975 | 2168120.761 | 3983085.538 | 1145015.991 | 1169480.572 | 1329652.999 | HMDB00079  |
| 2-deoxy-D-ribose               | 38443.42225 | 32855.168   | 44885.0112  | 60300.8054  | 66798.14445 | 77339.61165 | 34354.4004  | 32463.2861  | 41022.1094  | 35219.49075 | 34026.29735 | 47681.31135 | HMDB03224  |
| adenine                        | 65463.2623  | 111585.7405 | 130081.2694 | 103348.2788 | 109680.4979 | 121407.1342 | 148133.8846 | 174631.3293 | 162603.1491 | 138566.6576 | 144295.7721 | 174974.8312 | HMDB00034  |
| Hypoxanthine                   | 186384.815  | 1158490.073 | 138191.6201 | 135749.0904 | 173475.7087 | 150433.14   | 263503.2581 | 168632.6112 | 43998312.13 | 67604.3033  | 93788.4803  | 184690.5253 | HMDB00157  |
| 2-keto-4-methylthiobutyrate    | 44617.41155 | 39424.57845 | 64080.03255 | 111783.5465 | 86247.623   | 82403.2782  | 59739.54475 | 45052.4616  | 74348.7947  | 55352.5149  | 79024.43575 | 83091.3013  | HMDB01553  |
| L-cysteinylglycine             | 13972.346   | 55448.5539  | 1508.98035  | 1632.85785  | 178329.4192 | 224222.6452 | 452722.6632 | 499273.8988 | 555538.7996 | 225110.2791 | 167499.9607 | 182645.1505 | HMDB00078  |
| choline phosphate(1-)          | 2287336.983 | 5228047.556 | 4460712.91  | 7357510.933 | 8017765.819 | 8008405.174 | 16102582.45 | 18162913.23 | 20081839.65 | 19954103.03 | 19917455.12 | 22715529.49 | HMDB01565  |
| Nicotinamide                   | 4436802.213 | 3338050.346 | 5066688.251 | 7403198.362 | 4748095.029 | 4473870.526 | 6444650.104 | 5794064.27  | 6229055.223 | 4232500.204 | 4736108.487 | 4864077.022 | HMDB01406  |
| N-acetylputrescine             | 1045534.38  | 1824830.131 | 2601005.983 | 1816135.02  | 2145739.169 | 2498795.165 | 1693855.571 | 2051822.159 | 2641974.857 | 1832919.682 | 2417884.754 | 2835138.579 | HMDB02064  |
| Urocanate                      | 548680.3424 | 349432.7562 | 872829.4574 | 929552.5272 | 575128.389  | 214075.4208 | 346544.0913 | 183888.6555 | 292064.2131 | 168041.9875 | 308725.4886 | 199614.4469 | HMDB00301  |
| Methylimidazoleacetic acid     | 158369.5358 | 152969.2729 | 193325.8313 | 215606.5645 | 182181.9307 | 182957.9074 | 147058.0804 | 168320.8487 | 263786.4588 | 143458.7343 | 153752.8809 | 179254.9189 | HMDB02820  |
| 4-Imidazolone-5-propanoate     | 162325.3219 | 135519.6418 | 131650.9132 | 262610.7248 | 303088.5063 | 326232.9549 | 340569.1178 | 349274.404  | 290082.5335 | 219922.0335 | 220860.0759 | 216384.5681 | HMDB01014  |
| D-Alanyl-D-alanine             | 94441.7266  | 113599.3022 | 112621.0096 | 66363.79515 | 63388.5139  | 67032.00565 | 31862.8869  | 39670.89825 | 53284.9716  | 54977.48975 | 66558.48775 | 78141.5186  | HMDB03459  |
| N-acetyl-L-asparagine          | 87803.38795 | 61812.2568  | 82617.7111  | 121596.4953 | 78713.1021  | 74595.902   | 78526.62575 | 71938.4897  | 61571.534   | 62666.7765  | 69356.22715 | 70504.72865 | HMDB06028  |
| citr_L[e]                      | 673891.3813 | 565241.2566 | 765611.1199 | 929713.7498 | 544379.9703 | 497891.0584 | 625523.6694 | 527752.8773 | 2450162.516 | 448384.333  | 495492.1841 | 526129.3237 | NA         |
| D-Glucosamine                  | 218065.063  | 189692.136  | 237534.2315 | 395749.1983 | 200811.5083 | 144214.0482 | 164004.063  | 133199.3114 | 106456.1891 | 194842.8651 | 194441.4618 | 205103.1232 | HMDB01514  |
| benzoate                       | 255456.3404 | 183965.9587 | 241799.0092 | 250275.8675 | 207248.8249 | 211090.421  | 186175.5966 | 175980.4556 | 199434.7597 | 167225.693  | 186115.7    | 197709.6806 | HMDB01870  |
| 1-methylnicotinamide           | 13486.4438  | 14456.32825 | 12808.25245 | 11670.79655 | 10106.0683  | 10401.91975 | 10576.8131  | 12004.91475 | 13204.546   | 11398.2189  | 12583.00135 | 10224.11765 | HMDB00699  |
| anthranilate                   | 451721.9077 | 634257.4141 | 487636.2038 | 457429.2164 | 677711.105  | 595567.5182 | 593268.6602 | 666836.442  | 705460.4741 | 630780.8906 | 702554.1089 | 522655.7848 | HMDB01123  |
| 3-methylcrotonoylglycine       | 118886.1887 | 84976.60395 | 153873.5676 | 232024.2925 | 111437.3327 | 85122.3252  | 112839.9788 | 82361.78485 | 104069.1998 | 76990.91015 | 93645.8686  | 103423.4038 | HMDB00459  |
| (R)-carnitine                  | 86556106.34 | 72913771.83 | 65336157.65 | 17808972.68 | 21940452.21 | 21576123.92 | 48869793.51 | 54341367.12 | 67879969.75 | 43223621.01 | 41442142.85 | 35820208.73 | HMDB00062  |

|                                                     |             |             |             |             |             |             |             |             |             |             |             |             |           |
|-----------------------------------------------------|-------------|-------------|-------------|-------------|-------------|-------------|-------------|-------------|-------------|-------------|-------------|-------------|-----------|
| N(2)-acetyl-L-ornithine                             | 563095.8583 | 409942.2027 | 686652.7408 | 667998.6275 | 453699.815  | 404884.7435 | 231869.6773 | 217203.0454 | 264841.1921 | 343676.2694 | 419889.0843 | 455513.4962 | HMDB03357 |
| 2-phenylethanamine                                  | 1031648.449 | 987885.7739 | 802637.0248 | 654519.4888 | 1727441.067 | 1779993.407 | 1808620.182 | 1593764.629 | 974408.0419 | 1759178.246 | 1822947.069 | 1837199.743 | HMDB12275 |
| tyramine                                            | 4964819.644 | 5073529.391 | 3508281.092 | 2270842.465 | 7355768.947 | 7728526.793 | 7154392.194 | 6469076.714 | 5449236.714 | 7331103.359 | 7857224.571 | 8475841.926 | HMDB00306 |
| dopaminochrome                                      | 118734.7305 | 104951.7405 | 93941.8967  | 158381.275  | 154984.2708 | 169216.7468 | 251551.4551 | 275659.1644 | 363611.1928 | 126883.4752 | 124304.8568 | 115356.7463 | NA        |
| Pyridoxal                                           | 80329.43405 | 86204.36335 | 67156.00515 | 136494.6897 | 152068.0202 | 171557.1305 | 240565.0721 | 270428.155  | 363516.1356 | 131281.4974 | 118257.989  | 116025.9934 | HMDB01545 |
| N-acetyl-D-glucosamine                              | 101178.1852 | 60117.4881  | 118110.9012 | 219738.5823 | 237983.5753 | 227146.6486 | 237758.366  | 191542.3247 | 303086.2515 | 78165.11375 | 131966.1657 | 122460.4496 | HMDB00215 |
| sn-Glycero-3-phosphocholine                         | 58105177    | 48159001.27 | 44305549.62 | 108249385.9 | 128097335.3 | 137662949.7 | 116807250.9 | 119641422   | 140367139.8 | 100517443.5 | 99178707.69 | 81286865.12 | HMDB00086 |
| 5-amino-1-(5-phospho-D-ribose)imidazole             | 6057.6565   | 6991.7556   | 1000        | 16488.8732  | 9838.4257   | 22592.0561  | 19237.9781  | 23564.16955 | 7089.92425  | 32061.0419  | 23059.59175 | 18881.53425 | HMDB01235 |
| coumarin                                            | 124903.6732 | 83305.8833  | 121154.1039 | 147817.3785 | 100541.8722 | 125143.2566 | 93819.63585 | 88749.06735 | 91168.37665 | 90375.84275 | 79625.0429  | 85100.33835 | HMDB01218 |
| N6N6N6-Trimethyl-L-lysine                           | 635730.7337 | 462376.7585 | 1023583.101 | 1235718.376 | 1110849.399 | 1187747.353 | 742258.8718 | 732199.0874 | 1251497.925 | 596868.8311 | 854721.0017 | 900524.265  | HMDB01325 |
| L-Alanyl-L-leucine                                  | 92333.894   | 67350.6805  | 99204.8771  | 170316.226  | 168516.3358 | 163055.6314 | 98190.1645  | 104523.2454 | 83145.9722  | 113257.4893 | 112258.5784 | 165506.3174 | HMDB28691 |
| O-acetylcarnitine                                   | 39582344.4  | 34374618.71 | 32210745.72 | 5957270.641 | 7163641.78  | 7282702.216 | 12461986.94 | 12426211.37 | 24530287.59 | 19602799.39 | 20290893.64 | 21182751.16 | HMDB00201 |
| 2-deoxycytidine                                     | 73250.3702  | 35075.8395  | 95226.361   | 144991.8633 | 76639.1617  | 64216.18255 | 63635.61875 | 40152.80125 | 104606.2472 | 36571.5901  | 65368.0097  | 51429.11655 | HMDB00014 |
| C9H13N5O3(4)                                        | 26950642.93 | 22207554.11 | 28540058.1  | 33113127.65 | 25933442.6  | 23383943.09 | 22963415.49 | 19910130.61 | 21147046.44 | 22352420.98 | 24538522.38 | 25044976.06 | NA        |
| naphthalene                                         | 50170.55605 | 48777.3592  | 50815.28035 | 42788.6315  | 51164.3404  | 57788.04595 | 45214.7289  | 44257.3826  | 50445.788   | 49062.48415 | 47928.17395 | 48904.7531  | HMDB29751 |
| perillyl aldehyde                                   | 625449.0741 | 579102.4659 | 585793.7488 | 509223.5846 | 564657.3005 | 553659.7446 | 488929.7575 | 499526.8288 | 548060.4427 | 520737.8349 | 526030.6289 | 576232.55   | HMDB03647 |
| 5-Hydroxyindoleacetate                              | 31074.34245 | 11013.03705 | 38653.0481  | 111152.9689 | 110007.7126 | 112845.5062 | 33915.2138  | 27315.20135 | 47412.4371  | 16527.4709  | 32523.2793  | 24893.9083  | HMDB00763 |
| N-methyl-467-trihydroxy-1234-tetrahydroisoquinoline | 186880.0601 | 161498.229  | 228837.1005 | 484054.9371 | 557527.2992 | 567207.4715 | 321542.1257 | 329301.5764 | 469585.1683 | 394219.8414 | 380239.379  | 392352.9683 | HMDB60065 |
| propionyl-carnitine                                 | 3079793.228 | 2099913.318 | 2395899.298 | 1297819.063 | 927773.321  | 894008.2275 | 1572662.941 | 1449594.425 | 2237700.466 | 1510323.961 | 1682932.355 | 2190703.03  | HMDB00824 |
| 2-deoxyguanosine/adenosine                          | 14369.7748  | 12171.34245 | 34014.45555 | 49231.52375 | 20570.2631  | 22396.1545  | 78271.1983  | 52665.8903  | 54818.38275 | 22233.90295 | 46219.0557  | 41834.25315 | HMDB00050 |
| xanthosine                                          | 19808.9045  | 21501.18775 | 19966.6656  | 31411.66575 | 23407.0782  | 23660.77565 | 30433.3403  | 57605.71025 | 61789.98755 | 19964.956   | 20314.141   | 18719.8451  | HMDB00299 |
| glutathionate(1-)                                   | 1212936.774 | 3975233.085 | 398455.7062 | 292070.9245 | 12120611.59 | 14899430.58 | 30298684.32 | 32183474.73 | 36615452.75 | 15096475.74 | 11592278.96 | 12509130.9  | HMDB00125 |
| beta-carboline                                      | 8858.81065  | 84547.4887  | 8233.5123   | 3622.7048   | 11783.61335 | 13667.4527  | 1000        | 3129.53775  | 1000        | 15706.63965 | 15274.5568  | 17628.60635 | HMDB12897 |
| butyryl carnitine                                   | 2496716.107 | 1593929.489 | 2326311.503 | 2911855.303 | 2107075.317 | 2059862.199 | 5037696.821 | 4453351.611 | 10541875.31 | 1756996.951 | 2069772.037 | 1664423.669 | HMDB02013 |
| 3-Hydroxybutyrylcarnitine                           | 593847.1152 | 472969.487  | 441246.6296 | 119979.7426 | 110317.9433 | 104725.8808 | 207374.1413 | 190860.6627 | 326761.0828 | 198322.318  | 192348.6375 | 179947.1825 | HMDB13127 |
| N-Ribosylnicotinamide                               | 40088.128   | 34289.60385 | 32748.24955 | 32928.90165 | 32699.8921  | 30739.95615 | 38900.77525 | 34491.2954  | 35235.8873  | 38669.81755 | 33841.2464  | 30075.1659  | HMDB00855 |
| succinyl carnitine                                  | 375565.5728 | 306784.8905 | 453086.7811 | 477900.751  | 321075.6531 | 325383.1804 | 300552.018  | 265950.9159 | 322781.467  | 380875.5231 | 418091.5526 | 459064.9212 | NA        |
| 35-dihydroxy-34-dihydro-14-benzothiazine            | 1000        | 1000        | 1818.10645  | 20775.41535 | 16249.7384  | 18045.50175 | 48635.31125 | 38115.3636  | 68058.99495 | 2397.75185  | 6681.20485  | 1727.50785  | NA        |
| 5-Methylthioadenosine                               | 228516.5659 | 137860.8743 | 307284.5659 | 575548.3776 | 212158.5119 | 196525.4683 | 487477.6945 | 356066.4355 | 530131.1732 | 142935.0121 | 154831.8746 | 364923.6028 | HMDB01173 |
| N-acetylneuraminic acid                             | 321344.3495 | 235757.7101 | 365068.1792 | 695115.6302 | 509519.3487 | 472380.9648 | 737362.6129 | 575021.9376 | 652211.9877 | 441985.9024 | 510518.2854 | 521541.3687 | HMDB00230 |

|                                                 |             |             |             |             |             |             |             |             |             |             |             |             |           |
|-------------------------------------------------|-------------|-------------|-------------|-------------|-------------|-------------|-------------|-------------|-------------|-------------|-------------|-------------|-----------|
| NeuNGc                                          | 10988.4971  | 6868.8748   | 12189.70375 | 38527.13885 | 46722.1362  | 46925.59555 | 15652.8195  | 16632.6929  | 11544.1378  | 88255.6127  | 95910.55815 | 53651.3795  | NA        |
| tiglyl carnitine                                | 100482.3284 | 64286.7062  | 96644.1712  | 85976.47165 | 57167.05415 | 47809.75705 | 95308.5441  | 91487.65065 | 107566.6079 | 97657.85395 | 109727.8476 | 115086.586  | HMDB02366 |
| 3-hydroxy-isovaleryl carnitine                  | 174902.2349 | 153935.605  | 122175.5015 | 28859.21315 | 47921.70655 | 38772.30825 | 156675.1936 | 153651.4912 | 211151.6622 | 128196.6914 | 132353.3365 | 123982.0382 | NA        |
| thiamine(1+)                                    | 5644248.623 | 3562392.86  | 6568238.024 | 7631434.324 | 4551548.122 | 4307933.616 | 3976955.196 | 2892077.886 | 3266923.857 | 3258478.43  | 4057395.579 | 4465615.52  | HMDB00235 |
| glutaryl carnitine                              | 550237.1148 | 433755.674  | 874410.3491 | 1129714.979 | 703394.9733 | 696759.8509 | 600854.0068 | 492494.1479 | 557095.5373 | 587273.1735 | 730377.8858 | 792311.047  | HMDB13130 |
| S-(2-Methylpropanoyl)-dihydroliipoamide         | 2101670.709 | 1765677.369 | 2530213.217 | 2948632.718 | 2321006.233 | 2194807.836 | 2230866.727 | 1967547.374 | 2163090.288 | 2081555.326 | 2240512.176 | 2398835.568 | HMDB06868 |
| octenoyl carnitine                              | 47351.7806  | 39100.49115 | 47238.2988  | 32294.7913  | 20317.00385 | 18870.7481  | 21065.07715 | 23558.1524  | 25242.72165 | 26029.2672  | 27198.5663  | 29595.08065 | NA        |
| octanoyl carnitine/L-Octanoylcarnitine          | 56423.7971  | 41748.39795 | 33913.2704  | 20892.5259  | 22273.2948  | 21825.88235 | 57130.35895 | 51924.277   | 37955.863   | 46594.5605  | 48142.09995 | 57017.09785 | HMDB00791 |
| 12S-HHT                                         | 240386.0728 | 216153.0302 | 227548.5336 | 156156.5209 | 228968.2086 | 217990.9262 | 193621.325  | 185218.7165 | 233224.5617 | 181671.7369 | 187261.1955 | 230912.3389 | HMDB12555 |
| decenoyl carnitine                              | 20712.87565 | 18196.48975 | 12572.58655 | 4480.84295  | 2378.19915  | 2745.3451   | 2262.3702   | 4686.40575  | 3849.6177   | 6747.73365  | 5069.0227   | 7872.4823   | NA        |
| decanoyl carnitine                              | 14654.68855 | 6082.4593   | 7322.61625  | 6399.1583   | 4112.1828   | 3396.11885  | 17301.34895 | 17280.4816  | 11594.87395 | 14608.89245 | 14693.4837  | 15922.7561  | HMDB06210 |
| 3(S)10(R)-OH-octadeca-6-trans-412-cis-trienoate | 205970.132  | 185025.1328 | 185295.0869 | 146653.3925 | 192120.903  | 184054.9673 | 176487.4088 | 158022.5918 | 206489.9254 | 153398.8088 | 155424.467  | 178249.4375 | NA        |
| UDP(3-)                                         | 139981.4092 | 121374.4645 | 102219.808  | 238585.3538 | 306291.6041 | 327629.6329 | 439280.0106 | 395562.2856 | 450821.618  | 321746.9324 | 323222.0498 | 381300.3556 | HMDB00295 |
| CMP-2-aminoethylphosphonate                     | 5820.96255  | 4808.8948   | 2696.6979   | 3681.91815  | 1000        | 1399.5533   | 7354.81185  | 3224.70905  | 1000        | 70646.39685 | 74127.10495 | 100450.0138 | HMDB60067 |
| CDP-ethanolamine(1-)                            | 537095.6681 | 421188.1075 | 352548.0496 | 195360.5215 | 244483.9561 | 212907.4479 | 215197.5979 | 262535.638  | 94122.66635 | 453149.8032 | 443656.7969 | 559397.8352 | HMDB01564 |
| beta-1-4-mannose-N-acetylglucosamine            | 12774.8886  | 12785.7069  | 8616.596    | 16543.6989  | 23065.6904  | 21922.35305 | 61022.6732  | 64303.9535  | 91390.0245  | 21005.41445 | 25604.52555 | 16924.71605 | HMDB06535 |
| CMP-N-trimethyl-2-aminoethylphosphonate         | 19725.0963  | 16346.52645 | 15690.0003  | 15122.38125 | 12291.38145 | 15642.3583  | 23936.676   | 19359.74505 | 3362.5934   | 80239.8743  | 77392.33095 | 107067.6494 | HMDB60072 |
| CDPcholine                                      | 346670.5033 | 224599.1959 | 203369.8006 | 188096.7902 | 151837.8877 | 150257.4174 | 188124.9985 | 191011.2935 | 21307.2802  | 750474.0459 | 725794.9547 | 278435.2629 | HMDB01413 |
| GSSG                                            | 853186.6392 | 423703.1609 | 504784.3696 | 2520133.76  | 3141820.674 | 2770194.592 | 3905443.717 | 4320667.296 | 2674852.903 | 3164390.986 | 3696465.435 | 3747916.193 | HMDB03337 |
| CMP-N-acetyl-beta-neuraminate                   | 69310.5043  | 28567.8191  | 40545.7656  | 232522.5756 | 365059.3203 | 315371.1875 | 509119.0362 | 504243.1149 | 346937.2607 | 330068.9625 | 370991.645  | 371123.0495 | NA        |
| tetradecenoyl carnitine                         | 123696.5854 | 110695.8208 | 104897.3692 | 93518.70525 | 109902.5126 | 110115.9106 | 153693.1475 | 171330.9019 | 158944.5997 | 141673.5208 | 119476.8071 | 161348.4378 | HMDB13329 |
| NAD(1-)                                         | 560891.2625 | 401430.6641 | 340394.8254 | 644475.2034 | 1119309.6   | 1132919.237 | 1804694.479 | 1730508.357 | 2551315.398 | 578682.2291 | 582954.2768 | 880136.583  | HMDB00902 |
| NADP+(3-)                                       | 126174.3379 | 108648.9257 | 78422.67835 | 157072.838  | 135126.2503 | 150821.089  | 263172.2324 | 234342.7514 | 312205.2712 | 246132.3175 | 232103.9903 | 198696.6958 | HMDB00217 |
| pendtadenoyl carnitine                          | 29853.97165 | 24412.01355 | 16270.3142  | 36324.3774  | 38167.11505 | 46520.0427  | 71426.05065 | 90041.505   | 44507.378   | 102425.5901 | 92443.2903  | 100242.1545 | NA        |
| L-palmitoylcarnitine                            | 529540.2466 | 366806.1505 | 298815.5804 | 637395.0695 | 768082.6682 | 850210.9902 | 2460806.699 | 2614238.95  | 1075706.883 | 1593915.498 | 1597781.133 | 1859196.879 | HMDB00222 |
| 3-hydroxyhexadecenoylcarnitine                  | 18938.88545 | 17741.63405 | 14608.1878  | 7156.5703   | 15261.15825 | 16081.963   | 15838.0456  | 21761.46925 | 21947.1904  | 15567.05875 | 14282.2005  | 17354.29045 | HMDB13333 |
| 3-hydroxyhexadecanoylcarnitine                  | 15766.0983  | 7957.1416   | 7756.8177   | 3937.8178   | 2808.3873   | 2725.36755  | 11057.60445 | 11284.2446  | 11630.6357  | 23500.59755 | 24004.30775 | 29093.41285 | HMDB13336 |
| heptadecanoyl carnitine                         | 11917.70655 | 10617.00505 | 9191.48745  | 19304.74405 | 20110.41115 | 26930.73225 | 37503.29345 | 46765.65715 | 29072.85985 | 54276.7853  | 57668.9387  | 75708.62665 | HMDB06210 |

|                                                     |             |             |             |             |             |             |             |             |             |             |             |             |           |
|-----------------------------------------------------|-------------|-------------|-------------|-------------|-------------|-------------|-------------|-------------|-------------|-------------|-------------|-------------|-----------|
| stearoylcarnitine                                   | 142318.0386 | 115598.4058 | 102784.6394 | 94633.33035 | 112773.6776 | 119799.5354 | 155512.763  | 182339.6522 | 129522.9603 | 308089.0511 | 317159.1984 | 362427.6508 | HMDB00848 |
| 25-hydroxyvitamin D3-26-23-lactone                  | 11955.9935  | 12910.68005 | 6338.47885  | 5906.98885  | 13993.0703  | 12255.6432  | 3011.5497   | 8383.06665  | 17058.06095 | 4662.6761   | 5259.966    | 13039.35835 | HMDB00969 |
| 24-oxo-1alpha-23-25-trihydroxyvitamin D3            | 1000        | 1000        | 1000        | 6466.76205  | 34082.21965 | 39535.23505 | 10282.6177  | 8475.536    | 25500.79815 | 1323.666    | 2897.9481   | 6471.5584   | HMDB60129 |
| bilirubin(2-)                                       | 52747.45815 | 43136.77855 | 49982.1492  | 6495.3052   | 25307.78145 | 21419.8224  | 4602.9407   | 4221.33725  | 26789.557   | 10683.37035 | 14123.04525 | 1000        | HMDB00054 |
| C4H9NO2(4)                                          | 486080.9656 | 417269.8699 | 436181.6745 | 1032408.038 | 1278707.663 | 1303846.477 | 2954805.286 | 3136613.889 | 5257438.504 | 709197.2857 | 690611.6919 | 717198.5942 | NA        |
| Ureidopropionic acid/Glycylglycine                  | 8269864.866 | 5921243.926 | 9042857.969 | 11755406.67 | 12423909.42 | 12699509.6  | 6841170.598 | 5723291.658 | 7474719.868 | 6574079.167 | 7431288.389 | 8075331.903 | HMDB00026 |
| histamine                                           | 160639.8291 | 159788.4107 | 188681.9898 | 208762.3058 | 134800.6499 | 137250.1452 | 133497.5067 | 129533.2798 | 107443.4675 | 121541.1031 | 129512.2523 | 140869.0039 | HMDB00870 |
| 1-pyrroline-2-carboxylate/1-Pyrroline-5-carboxylate | 463927.2818 | 399012.9524 | 509224.4908 | 578119.7815 | 624147.217  | 640854.8928 | 496878.4602 | 482450.0696 | 751871.2106 | 354906.8041 | 410002.5988 | 477156.6053 | HMDB01301 |
| acetamidopropanal                                   | 38559542.78 | 30575067.61 | 41047074.62 | 51737413.41 | 70087990.65 | 66508301.75 | 64940247.36 | 66381151.05 | 126691787.3 | 44427576.73 | 47001606.16 | 60680666.64 | HMDB12880 |
| thymine/imidazol-4-ylacetate                        | 211655.5127 | 204274.2096 | 243400.4405 | 367462.16   | 362271.4214 | 374901.443  | 696016.4456 | 666242.3606 | 684339.6708 | 401183.1631 | 388963.7548 | 374831.8838 | HMDB00262 |
| Ornithine                                           | 148218.0249 | 140729.4406 | 220879.4508 | 346299.808  | 376057.6413 | 430745.7339 | 443414.1486 | 418070.5569 | 577432.5609 | 269336.6144 | 321187.4939 | 351878.1979 | HMDB00214 |
| 3-Ureidoisobutyrate/Glycylsarcosine                 | 108537862.8 | 77718872.73 | 119870802.1 | 117630203.6 | 95284590.03 | 93590738.79 | 57713639.02 | 45413283.43 | 48434444.86 | 62616132.31 | 72588313.83 | 80474168.98 | HMDB02031 |
| 4-acetamidobutanal-1                                | 414505.2334 | 341905.4328 | 348574.5195 | 352052.5584 | 337683.1153 | 304365.5498 | 311152.8381 | 314917.0436 | 297236.7302 | 334196.5253 | 295763.4752 | 331181.4677 | HMDB00716 |
| L-pipecolic acid-2                                  | 2115584.515 | 1583130.598 | 2443783.854 | 3438842.834 | 2255492.15  | 2248321.56  | 1663664.955 | 1471361.889 | 1659633.636 | 1658755.565 | 1946988.154 | 1955598.437 | HMDB00716 |
| C6H11NO3(4)                                         | 691238.4564 | 605724.3414 | 556274.2195 | 852753.5658 | 1101764.48  | 1084534.413 | 855846.041  | 919747.136  | 982879.3924 | 938820.1301 | 871620.4048 | 828595.8683 | NA        |
| (R)-mevalonate                                      | 683343.3881 | 484950.7728 | 764943.4707 | 705282.5765 | 596784.9752 | 564682.3223 | 346632.3792 | 283956.245  | 288262.2747 | 371234.5839 | 443851.0994 | 502880.1309 | HMDB59629 |
| spermidine dialdehyde-1                             | 435901.6166 | 296114.0573 | 348057.5614 | 1079899.155 | 279973.4013 | 147165.1906 | 168742.86   | 178618.0441 | 174657.2403 | 153827.0794 | 212555.5662 | 162444.9531 | HMDB13076 |
| spermidine dialdehyde-2                             | 190782.8389 | 147859.7643 | 202645.5548 | 308879.5855 | 257304.7293 | 240806.7569 | 324889.2572 | 318857.5779 | 415997.1781 | 341379.814  | 328825.054  | 337539.7678 | HMDB13076 |
| acetylcholine/4-(trimethylammonio)butanoate         | 3522672.096 | 3355403.951 | 2506053.713 | 6389161.609 | 10025972.47 | 10840262.91 | 6718007.55  | 7219744.232 | 8254453.137 | 6356589.067 | 5855177.738 | 4332626.25  | HMDB00895 |
| 2-methylbutrylglycine/isovalerylglycine             | 350924.1578 | 339303.4747 | 277739.6907 | 96131.1255  | 99045.7498  | 104359.8486 | 179316.2729 | 185936.9758 | 215968.9976 | 183266.305  | 174371.8734 | 177250.5699 | HMDB00339 |
| isoputrescine/putrescine                            | 159558.3548 | 115025.8486 | 202840.5806 | 414050.8472 | 344197.1626 | 397979.4432 | 400795.4416 | 413628.0616 | 361388.2523 | 253356.2786 | 320565.2843 | 304928.0765 | HMDB06009 |
| Glycylproline/L-Prolylglycine                       | 51285.42125 | 73417.51055 | 93508.6774  | 88790.6546  | 109730.6735 | 113014.4319 | 97570.4131  | 108626.6558 | 131719.8441 | 64762.16315 | 73752.41575 | 85433.4696  | HMDB00721 |
| N-Acetylmethionine                                  | 34437.971   | 14995.5336  | 43122.0937  | 101504.239  | 52120.5368  | 44589.15025 | 33414.64885 | 26049.1497  | 41970.0544  | 10452.26185 | 22962.5742  | 17301.76155 | HMDB11745 |
| leukoaminochrome/dopamine o-quinone-1               | 1924443.517 | 1319265.721 | 1953201.283 | 2193568.861 | 1917584.601 | 1824706.299 | 1787382.633 | 1381810.177 | 1693229.673 | 1361571.448 | 1649400.475 | 1644056.54  | HMDB12992 |
| leukoaminochrome/dopamine o-quinone-2               | 378156.9368 | 218507.9067 | 436377.5818 | 693922.5131 | 502044.2766 | 416095.0889 | 419773.8241 | 264514.7488 | 486253.7797 | 252132.7002 | 349407.6043 | 342847.2084 | HMDB12992 |
| Pyridoxine/Norepinephrine-1                         | 17987191    | 12613562.11 | 18558256.83 | 20284534.79 | 17107774.38 | 16189505.23 | 16197745.06 | 12332876.41 | 14200901.93 | 12543025.16 | 15583287.99 | 15445382.54 | HMDB00239 |

|                                                                                               |             |             |             |             |             |             |             |             |             |             |             |             |           |
|-----------------------------------------------------------------------------------------------|-------------|-------------|-------------|-------------|-------------|-------------|-------------|-------------|-------------|-------------|-------------|-------------|-----------|
| Glycylleucine                                                                                 | 212289.2666 | 192058.8495 | 224446.0427 | 205145.2921 | 157355.0243 | 158309.4429 | 127554.4517 | 128694.6038 | 131288.8738 | 184294.9876 | 206666.7114 | 216951.6443 | HMDB00759 |
| gama-L-glutamyl-L-alanine/5-L-Glutamyl-L-alanine-1                                            | 20436.17525 | 3220.92105  | 27283.658   | 61958.6414  | 130670.4723 | 79139.1993  | 96487.9867  | 36388.09925 | 175119.5194 | 3456.01165  | 10969.1181  | 17293.2803  | HMDB06248 |
| gama-L-glutamyl-L-alanine/5-L-Glutamyl-L-alanine-2                                            | 332777.174  | 233850.2715 | 409772.0196 | 390920.1608 | 229215.2674 | 218448.0303 | 233470.5747 | 199578.2707 | 397610.3755 | 133090.6539 | 165561.3761 | 184635.5395 | HMDB06248 |
| C9H8O3(3)                                                                                     | 667464.9324 | 520407.8154 | 663897.6786 | 687483.1804 | 604099.6116 | 523487.9445 | 488014.1466 | 488332.7949 | 573527.739  | 448973.2317 | 499420.4576 | 515218.1745 | NA        |
| Adrenaline/L-Normetanephrine                                                                  | 142401.5827 | 98573.6744  | 131881.1166 | 215165.8531 | 253521.6008 | 226673.9087 | 104735.7673 | 88162.9004  | 160209.7587 | 138651.3417 | 176029.0105 | 145853.8341 | HMDB00068 |
| pseudoecgonine/ecgonine                                                                       | 53378.13145 | 53775.3036  | 49191.65985 | 37251.728   | 33847.18005 | 28716.3734  | 41364.02015 | 39131.34905 | 40556.5387  | 42500.24325 | 37685.26005 | 47629.3269  | HMDB06348 |
| N(8)-acetylspermidine/N(1)-acetylspermidine                                                   | 1190767.227 | 3300105.777 | 2081215.32  | 2360177.204 | 2336025.047 | 1473144.493 | 2671453.608 | 2034076.084 | 955057.8947 | 3208488.107 | 2060412.262 | 1088090.802 | HMDB02189 |
| limonene/(+)-alpha-pinene                                                                     | 343276.7045 | 323551.1125 | 313384.3317 | 261781.5305 | 311718.3291 | 321686.0908 | 277307.6398 | 271939.5704 | 310814.4357 | 272678.0335 | 274662.6541 | 342409.3905 | HMDB03375 |
| C10H16O(3)                                                                                    | 352759.1855 | 306875.8029 | 315726.8971 | 278993.5297 | 313918.2582 | 314573.412  | 286736.0302 | 293044.2138 | 301761.5294 | 287133.9751 | 300668.5923 | 317320.8656 | NA        |
| indole-3-acetate/(5-hydroxyindol-3-yl)acetaldehyde                                            | 14567599.46 | 10173336.44 | 16055014.59 | 18257380.15 | 12537416.11 | 11192306.1  | 11927679.97 | 9153007.557 | 9566987.044 | 9853423.223 | 11572421.12 | 11146633.42 | HMDB00197 |
| 5-hydroxytryptophol/12-dehydrosalsolinol/NN-dimethylindoliumolate-1                           | 87352.15095 | 53498.8578  | 35320.99035 | 66438.28925 | 44563.1693  | 25287.56535 | 47930.1288  | 28520.4259  | 15414.7589  | 45595.1185  | 30112.18375 | 22003.68235 | HMDB01855 |
| 5-hydroxytryptophol/12-dehydrosalsolinol/NN-dimethylindoliumolate-2                           | 100105.5635 | 64181.40605 | 46445.96755 | 80215.05565 | 54531.4328  | 38459.8817  | 74884.3378  | 49215.54305 | 30042.8575  | 63490.33465 | 46652.90905 | 32010.8257  | HMDB01855 |
| (-)-Salsolinol/NN-dimethyldopaminequinone-1                                                   | 221960.0276 | 166607.8092 | 240939.4183 | 383451.427  | 386294.3537 | 368659.968  | 332781.8367 | 302870.3784 | 507812.21   | 254932.2833 | 262693.6939 | 262331.6247 | HMDB42012 |
| (-)-Salsolinol/NN-dimethyldopaminequinone-2                                                   | 3074966.162 | 2558533.73  | 3428266.764 | 6010259.815 | 10756549.63 | 10936149.93 | 5997460.812 | 5552187.643 | 7669706.134 | 6215972.269 | 6957706.146 | 6721343.27  | HMDB42012 |
| L-kynurenine/Formyl-5-hydroxykynurenamine                                                     | 155073.2769 | 80346.34655 | 201361.4304 | 444330.7291 | 457709.6844 | 447861.7386 | 159258.6081 | 124933.0359 | 206139.1999 | 92892.3711  | 134352.8461 | 130039.5819 | HMDB00684 |
| methyl indole-3-acetate                                                                       | 165600.1444 | 112330.1889 | 186406.9789 | 228584.1544 | 172457.7635 | 169801.5496 | 156451.8955 | 132730.0789 | 168903.9069 | 117836.5117 | 150078.5272 | 145915.7241 | HMDB29738 |
| 3-oxo-10(R)-hydroxy-octadeca-6E8E12Z-trienoate/3-oxo-10(S)-hydroxy-octadeca-6E8E12Z-trienoate | 588121.2256 | 531911.5916 | 539442.847  | 373685.4663 | 585707.7784 | 610630.3989 | 411445.1049 | 385571.873  | 591285.6534 | 409791.0547 | 406398.4008 | 612417.0632 | NA        |
| C18H32O4(3)                                                                                   | 334324.4211 | 442951.8972 | 386197.8217 | 268434.5331 | 308385.5117 | 245495.0626 | 266707.2751 | 304745.6378 | 250578.2175 | 280490.52   | 284501.1737 | 267141.438  | NA        |
| C20H28O2(7)                                                                                   | 26577.22265 | 28592.73285 | 23638.43115 | 19266.55375 | 35197.34035 | 21092.59435 | 22766.59675 | 26015.5713  | 18505.44975 | 22745.14915 | 23700.9779  | 20647.9009  | NA        |
| ADP/dGDP/PAP                                                                                  | 737762.88   | 613552.1821 | 582902.1346 | 1357889.147 | 1002432.262 | 1057329.138 | 2850855.537 | 1993290.115 | 961186.704  | 1287111.368 | 1361223.599 | 1356937     | HMDB01341 |
| ATP/dGTP                                                                                      | 3570950.858 | 4725251.972 | 2522775.382 | 4657630.883 | 10317668.29 | 7131618.032 | 7467061.86  | 8663605.224 | 7477705.532 | 6142711.25  | 4614728.173 | 3766125.364 | HMDB00538 |
| tetradecanoyl carnitine(myristoyl carnitine)                                                  | 101326.7501 | 52521.6108  | 52798.24925 | 159592.6987 | 210873.4816 | 259707.0156 | 979797.6905 | 1059614.642 | 580100.2827 | 236687.4012 | 236533.889  | 257293.0189 | HMDB05066 |
| trans-Hexadec-2-enoyl carnitine                                                               | 52279.1964  | 43818.284   | 39781.8682  | 106385.5219 | 184169.5922 | 208928.219  | 689951.5522 | 749675.2516 | 377196.9176 | 129523.3995 | 131947.5944 | 149021.1326 | HMDB06317 |



|                                          |             |             |             |             |             |             |             |             |             |             |             |             |           |
|------------------------------------------|-------------|-------------|-------------|-------------|-------------|-------------|-------------|-------------|-------------|-------------|-------------|-------------|-----------|
| Linoleyl carnitine/Linoelaidyl carnitine | 135353.5281 | 102818.463  | 59578.35025 | 31829.57695 | 41449.9363  | 46507.92685 | 56753.6162  | 69675.87505 | 24768.50135 | 67697.11575 | 62956.7195  | 66785.65305 | HMDB06469 |
| Elaidic carnitine/Vaccenyl carnitine     | 278116.44   | 228672.5183 | 168126.5155 | 538750.2732 | 827816.4754 | 918313.17   | 1370505.011 | 1535662.711 | 649696.5091 | 567268.5561 | 566898.7458 | 688814.1655 | HMDB06464 |
| C27H44O2(5)                              | 144462.0716 | 103159.115  | 85067.5253  | 175142.1475 | 234261.1371 | 295017.5537 | 654288.9563 | 720119.114  | 371607.0078 | 432907.5639 | 429567.372  | 487572.164  | NA        |
| C27H44O3(5)                              | 38801.05295 | 43882.4602  | 42012.6642  | 19429.07845 | 41476.49515 | 47747.1664  | 34631.44565 | 47927.4847  | 49192.34    | 37995.3242  | 40982.9258  | 38349.71615 | NA        |
| C27H42O4(3)                              | 1979.1243   | 1878.11975  | 4237.92455  | 3939.1969   | 17765.96585 | 14750.23935 | 8152.38525  | 10409.58365 | 21956.9884  | 3679.4537   | 4666.09035  | 4529.99445  |           |
| imidazole-4-acetaldehyde                 | 141465.9111 | 122447.1975 | 143917.2113 | 148556.0801 | 131023.0782 | 133058.2728 | 140303.4685 | 131076.4451 | 133033.7689 | 131876.2002 | 127953.0816 | 137439.9981 | HMDB03905 |
| 5-guanidino-2-oxopentanoic acid          | 211207.1552 | 299837.5915 | 335916.721  | 292071.2131 | 256357.9593 | 273200.0355 | 224243.0985 | 251730.8432 | 274878.668  | 249086.098  | 263481.6062 | 295608.9204 | HMDB04225 |
| phenylacetaldehyde                       | 16975.18885 | 13492.77415 | 16351.8321  | 14153.7712  | 17654.7251  | 9265.2647   | 13153.65305 | 10557.6005  | 7830.68125  | 15776.65435 | 15408.8991  | 10197.7538  | HMDB06236 |
| Chitobiose                               | 3356.1733   | 1634.2888   | 1786.35765  | 3904.89255  | 3161.2814   | 7418.90585  | 4501.5955   | 1748.95815  | 7361.63835  | 6331.7155   | 1432.65775  | 2806.4361   | HMDB03556 |
| L-cysteine                               | 10652.8297  | 15114.8579  | 14552.99515 | 6373.55725  | 14074.53085 | 12201.8908  | 12450.13295 | 9187.02785  | 10818.33765 | 17669.8902  | 17835.5098  | 24162.6894  | HMDB00574 |
| NN-dimethylglycine                       | 367570.8495 | 320417.6544 | 334992.7376 | 390069.8324 | 362661.5339 | 322046.8443 | 314178.5473 | 276042.9231 | 334607.2937 | 302446.7981 | 293926.3555 | 311028.2999 | HMDB00092 |
| L-asparagine                             | 8268920.156 | 5921061.787 | 9034871.96  | 11744524.1  | 12423909.42 | 12699509.6  | 6840826.039 | 5723291.658 | 7473870.873 | 6573853.852 | 7427886.138 | 8075059.421 | HMDB00168 |
| choline                                  | 1556855.757 | 1420694.497 | 1237633.08  | 1215885.239 | 1365429.782 | 1492743.626 | 1151436.386 | 1432226.361 | 1182574.786 | 1444181.171 | 1410338.422 | 1421642.747 | HMDB00097 |
| L-methionine                             | 6373605.939 | 4292501.322 | 7362884.532 | 7947223.399 | 5576669.365 | 5255978.197 | 4530470.917 | 3653015.566 | 4193960.791 | 3765169.569 | 4800402.961 | 4746143.099 | HMDB00696 |
| Guanine                                  | 7125.9057   | 9280.63195  | 10454.8253  | 20032.7925  | 26809.49185 | 28858.05075 | 41744.4333  | 40535.3449  | 54319.4314  | 20428.13455 | 22279.988   | 12349.76165 | HMDB00132 |
| L-histidine                              | 4226797.086 | 3386917.201 | 6292962.117 | 7634544.023 | 5766146.225 | 6243186.497 | 5060370.458 | 4241065.864 | 5907852.58  | 3624096.311 | 4738652.457 | 5705914.521 | HMDB00177 |
| spermidine(3+)                           | 73473.0983  | 46025.6396  | 74259.2974  | 72883.77585 | 27862.29615 | 35190.1724  | 49573.55325 | 23930.6119  | 19157.85405 | 51234.0107  | 36191.94405 | 56904.15985 | HMDB01257 |
| L-phenylalanine                          | 38996236.33 | 25102718.59 | 44340852.47 | 55992445.51 | 40104488.04 | 38163465.35 | 35684677.1  | 29836305.13 | 37525689.41 | 25902057.16 | 33431889.64 | 33170058.99 | HMDB00159 |
| Biotin                                   | 72074.84855 | 30067.1448  | 84684.89435 | 168121.1847 | 134606.6008 | 120081.4625 | 129154.2778 | 67834.17305 | 158201.0852 | 33028.5236  | 60802.6094  | 52582.6596  | HMDB00030 |
| S-Adenosyl-L-homocysteine                | 1458.0441   | 1000        | 1607.48805  | 7834.45635  | 7734.04375  | 9211.02795  | 31818.2183  | 24854.51735 | 18028.67365 | 5181.7963   | 3092.17925  | 4448.32835  | HMDB00939 |
| S-adenosyl-L-methionine                  | 4205.47035  | 9819.83755  | 5277.1859   | 7564.2617   | 9851.7829   | 7966.16125  | 28171.0593  | 27787.75205 | 28726.89125 | 49879.68935 | 43544.83315 | 49390.0319  | HMDB01185 |
| Riboflavin                               | 301353.9259 | 198535.4269 | 312539.3407 | 275326.0614 | 244867.0865 | 228234.3349 | 225637.6498 | 161533.6564 | 227521.5864 | 192472.841  | 245897.3644 | 243124.9681 | HMDB00244 |
| Folate                                   | 15123.6052  | 12797.20455 | 17584.4319  | 16858.22835 | 9329.87145  | 13051.81265 | 4907.13795  | 2389.94535  | 6660.4994   | 7156.9562   | 7732.42645  | 6734.13025  | HMDB00121 |
| Coenzyme A                               | 1000        | 1000        | 1000        | 1000        | 1463.98395  | 2623.6323   | 3493.79435  | 9938.79235  | 32587.85985 | 3040.9245   | 1000        | 1000        | HMDB01423 |
| L-threonine                              | 3833326.895 | 2632377.558 | 4568312.391 | 6421617.737 | 5955058.533 | 5732782.559 | 2849733.894 | 2485173.209 | 2616447.243 | 3005712.428 | 3653723.028 | 3833952.89  | HMDB00167 |
| glycine betaine                          | 51055831.81 | 39637921.94 | 51950782.88 | 71463489.73 | 74466574.53 | 74509084.6  | 71749244.48 | 68361755.33 | 93068935.28 | 69359983.72 | 75012332.71 | 64931184.32 | HMDB00043 |
| L-valine                                 | 4469939.827 | 5009558.536 | 4498191.16  | 3648090.137 | 4624898.985 | 4552969.891 | 4536577.97  | 4941799.49  | 4346606.583 | 4397433.927 | 4310558.117 | 4849221.2   | HMDB00883 |
| L-glutamine                              | 108424052.7 | 77650167.43 | 119760717.4 | 117267891.2 | 95218698.73 | 93534993.75 | 57682273.9  | 45385526.61 | 48415813.74 | 62569477.71 | 72542619.84 | 80431915.98 | HMDB00641 |
| L-tyrosine                               | 2805391.902 | 2256754.092 | 2914111.96  | 3131794.263 | 2652117.806 | 2418530.843 | 2427694.975 | 2250507.14  | 2639115.508 | 2126505.293 | 2310974.174 | 2375745.919 | HMDB00158 |
| L-alanine                                | 2318442.514 | 1688523.089 | 2254314.613 | 4116290.579 | 7041215.373 | 7034372.697 | 5907194.836 | 5999274.063 | 11828992.93 | 2610654.181 | 2807807.982 | 2795588.041 | HMDB00161 |

|                                  |             |             |             |             |             |             |             |             |             |             |             |             |           |
|----------------------------------|-------------|-------------|-------------|-------------|-------------|-------------|-------------|-------------|-------------|-------------|-------------|-------------|-----------|
| L-proline                        | 38559542.78 | 30575067.61 | 41047074.62 | 51737413.41 | 70087990.65 | 66508301.75 | 64940247.36 | 66381151.05 | 126691787.3 | 44427576.73 | 47001606.16 | 60680666.64 | HMDB00162 |
| IMP                              | 353858.184  | 228351.2157 | 297504.9162 | 319385.1938 | 160188.0938 | 138971.5476 | 371233.6959 | 339110.817  | 161331.5746 | 127801.0567 | 161033.3643 | 177265.8321 | HMDB00175 |
| inosine                          | 106289.4605 | 46714.1254  | 111581.3955 | 540324.0201 | 296924.4834 | 274340.7387 | 875491.21   | 548145.7985 | 7712274.933 | 116896.1976 | 181894.5723 | 130356.2622 | HMDB00195 |
| Acetyl CoA                       | 1415.226    | 2254.171    | 1000        | 1000        | 12866.76595 | 8855.2672   | 16678.4297  | 36714.7142  | 70696.0051  | 9591.6572   | 5394.48315  | 11887.4207  | HMDB01206 |
| glycolate                        | 490873.1869 | 494538.444  | 433029.5972 | 467915.5068 | 437777.4865 | 534260.3046 | 392224.5971 | 478076.9099 | 479600.791  | 445245.0316 | 531971.4651 | 561915.2885 | HMDB00115 |
| oxalate(2-)                      | 1454266.811 | 911892.8149 | 1241761.756 | 721373.1718 | 664956.6103 | 500912.0994 | 415929.672  | 409358.9301 | 262157.5725 | 438255.0906 | 425400.4939 | 487178.5617 | HMDB02329 |
| Hypotaurine                      | 197074.6046 | 100635.2476 | 103099.5177 | 389197.1148 | 530054.1684 | 492849.6966 | 774431.2204 | 793280.7056 | 590989.6459 | 356744.47   | 361897.5053 | 327517.5181 | HMDB00965 |
| Taurine                          | 15885857.93 | 14199744.12 | 9474136.515 | 23211571.83 | 48719306.92 | 52143467.34 | 58010485.86 | 58800395.5  | 63768516.89 | 31508970.21 | 30574249.6  | 29377386.99 | HMDB00251 |
| C3H4O2(3)                        | 3169596.631 | 2445657.78  | 3427527.059 | 3912648.326 | 2710598.557 | 2519461.913 | 2600902.9   | 2128245.832 | 2640249.264 | 2385905.843 | 2615676.104 | 2713795.249 | NA        |
| C3H6O2(4)                        | 606840.446  | 503676.4863 | 546700.5047 | 634423.8814 | 550992.4541 | 493425.587  | 536808.1607 | 493483.5373 | 494183.236  | 510042.0983 | 513958.5466 | 507750.7261 | NA        |
| 3-Sulfino-L-alanine              | 45705.554   | 50006.35955 | 24884.5047  | 36817.8095  | 37769.5344  | 76087.69285 | 29734.75245 | 53437.17875 | 34609.8984  | 40530.70835 | 29492.68575 | 31105.0751  | HMDB00996 |
| (S)-3-sulfonatolactate(2-)       | 17633.0961  | 17759.7745  | 14489.16185 | 17387.7399  | 59188.8589  | 53745.94375 | 38975.95015 | 43143.978   | 134631.0716 | 17281.55695 | 21855.6584  | 20923.78735 | HMDB60176 |
| Glycerol 3-phosphate             | 318519.8275 | 266153.0199 | 257580.0263 | 626462.6377 | 539779.0634 | 525728.4981 | 769608.0261 | 731768.967  | 1181099.893 | 580996.1241 | 592056.2214 | 502094.8644 | HMDB00126 |
| O-Phospho-L-serine               | 1000        | 1000        | 1000        | 3720.4128   | 13339.59355 | 13883.7764  | 2837.30265  | 5248.4218   | 1000        | 7561.83295  | 6085.5978   | 2253.34865  | HMDB01721 |
| L-2-amino-3-oxobutanoic acid     | 95135.66825 | 100186.3085 | 115282.7188 | 181091.0292 | 117215.1313 | 109250.4447 | 89435.93135 | 89871.1374  | 107353.5135 | 87073.77105 | 101867.6394 | 111275.7892 | HMDB06454 |
| 3-(methylthio)propionate         | 165774.9392 | 156430.6521 | 152229.2801 | 171774.7408 | 158091.2789 | 153519.2212 | 151271.3235 | 140107.1163 | 138252.4581 | 142074.1156 | 157746.4644 | 141851.2203 | HMDB01527 |
| L-erythrulose                    | 3096674.792 | 2360942.12  | 3275155.605 | 3690706.579 | 2482793.746 | 2273114.781 | 1980994.071 | 1563912.721 | 1800825.442 | 2192408.712 | 2516456.045 | 2601855.582 | HMDB06293 |
| D-aspartate(1-)                  | 20476160.83 | 14889761.74 | 15791347.23 | 42105990.42 | 52143660.57 | 53923746.3  | 72336989.84 | 67947025.98 | 57263532.06 | 30178458.51 | 30791477.27 | 29688474.54 | HMDB06483 |
| (S)-malate(2-)                   | 12511300.03 | 11257802.94 | 10246186.02 | 15958198.68 | 24005448.5  | 24490012.39 | 42885901.39 | 41615080.89 | 69107296.55 | 16196891.25 | 15707219.9  | 22402817.89 | HMDB00156 |
| L-threonate                      | 11862107.28 | 6823337.451 | 13554058.27 | 14397454.24 | 12092017.2  | 10983528.59 | 12819955.44 | 10472567.54 | 18283539.01 | 5969601.096 | 7000740.428 | 7488726.335 | HMDB00943 |
| D-Erythrose 4-phosphate          | 16971.88235 | 13464.54285 | 13833.04205 | 35641.1459  | 67493.4909  | 67668.11715 | 88821.3733  | 100919.5312 | 198883.6494 | 29928.2902  | 30259.1961  | 41673.14795 | HMDB01321 |
| N-phosphocreatinate(2-)          | 111639.338  | 129939.8967 | 120757.5557 | 1136916.954 | 1089801.503 | 1039638.345 | 223998.3279 | 321699.6218 | 1111280.826 | 525081.3387 | 508273.4678 | 539580.9626 | HMDB01511 |
| 3-methyl-2-oxobutanoate          | 3109945.459 | 2959269.42  | 2578070.522 | 2385705.401 | 2967556.451 | 3048254.1   | 2829061.698 | 3033185.329 | 2976792.663 | 3051448.355 | 2935096.08  | 3180720.972 | HMDB00019 |
| beta-hydroxy-beta-methylbutyrate | 4399957.308 | 5080048.328 | 3601134.786 | 3391923.313 | 4172469.236 | 5251090.538 | 3647163.8   | 5111827.259 | 4043675.251 | 5268961.884 | 4615287.954 | 4686149.787 | HMDB00754 |
| C5H9NO3(5)                       | 5193959.801 | 3486152.444 | 5380837.9   | 8589372.154 | 11642321.04 | 11110199.28 | 8427607.159 | 8252412.885 | 11970820.79 | 3927454.925 | 4604988.607 | 5164886.567 | NA        |
| 2-oxoglutaramate                 | 291250.8239 | 152776.1113 | 452495.1486 | 613902.6435 | 300684.2638 | 258178.9153 | 296122.9832 | 215314.0804 | 443651.2427 | 142452.0453 | 177702.4289 | 225734.8229 | HMDB01552 |
| 2-oxoglutarate(2-)               | 649259.7799 | 430444.2144 | 478981.0616 | 815583.8748 | 868955.8327 | 809096.6966 | 1404530.296 | 1237402.96  | 2252216.793 | 988882.0252 | 1273678.415 | 954226.3595 | HMDB00208 |
| Xanthine                         | 1528444.548 | 1455424.609 | 1576646.562 | 2115702.705 | 1659477.837 | 1701420.353 | 1629805.813 | 1724931.877 | 1550328.37  | 1852605.071 | 1534943.738 | 1615612.245 | HMDB00292 |
| orotate                          | 160564.9185 | 192545.3578 | 246386.8396 | 239681.3757 | 227135.1091 | 227119.1053 | 257023.7899 | 258840.8597 | 397906.4391 | 178349.5472 | 227881.2961 | 227556.2168 | HMDB00226 |
| (S)-dihydroorotate               | 1000        | 1000        | 1000        | 1000        | 1000        | 1000        | 53799.98505 | 44971.66605 | 134798.95   | 1000        | 1000        | 1111.80195  | HMDB03349 |
| N-acetyl-L-cysteine              | 46191.8019  | 42157.3297  | 37509.42265 | 75308.70105 | 85916.9104  | 82489.2921  | 73655.4568  | 71922.82925 | 54518.2608  | 69043.27775 | 71016.72105 | 72378.0003  | HMDB01890 |

|                                      |             |             |             |             |             |             |             |             |             |             |             |             |            |
|--------------------------------------|-------------|-------------|-------------|-------------|-------------|-------------|-------------|-------------|-------------|-------------|-------------|-------------|------------|
| 79-dihydro-1H-purine-2688(3H)-trione | 1953307.32  | 1503025.716 | 1954239.396 | 2079641.453 | 2174252.302 | 2528665.673 | 1044753.129 | 973027.533  | 1092762.616 | 1327738.874 | 1594026.982 | 1234386.72  | NA         |
| N-Carbamoyl-L-aspartate              | 9200.3973   | 6213.5054   | 6179.2905   | 24580.53685 | 31937.50025 | 26020.1596  | 2342315.243 | 2184925.116 | 5908081.722 | 16977.6404  | 16313.26325 | 4906.5052   | HMDB00828  |
| 5-Phospho-beta-D-riboseylamine       | 1929.71105  | 1554.3216   | 7597.44735  | 18119.83105 | 8405.0437   | 6247.8697   | 14469.30415 | 10152.58885 | 10963.34005 | 3177.14065  | 3759.32205  | 4848.1907   | HMDB01128  |
| (R)-2-hydroxy-4-methylpentanoate     | 1798352.952 | 1345791.03  | 1422476.3   | 1406510.427 | 1535689.507 | 1482279.497 | 1437271.645 | 1339921.024 | 1509030.955 | 1371287.494 | 1382627.668 | 1470902.105 | HMDB00624  |
| 4-nitrophenolate                     | 139923.3226 | 135012.6945 | 152360.8381 | 141108.5978 | 149802.9009 | 152052.3993 | 150935.6894 | 147106.5215 | 150426.6623 | 148593.611  | 137644.0777 | 138238.0603 | NA         |
| 2-methylglutaconic acid              | 2189137.374 | 1632280.442 | 2290712.263 | 2581505.864 | 1661656.816 | 1471576.687 | 1433298.195 | 1087395.204 | 1161782.637 | 1554029.552 | 1716863.722 | 1677559.089 | HMDB02266  |
| adipic acid                          | 900747.1622 | 807786.057  | 748883.0611 | 576186.614  | 703885.9952 | 525663.998  | 550729.1538 | 614228.0106 | 684095.8221 | 621169.9277 | 701449.0169 | 678641.6136 | HMDB00448  |
| Lysine                               | 3042769.642 | 1905258.309 | 3548916.325 | 4698373.499 | 3084568.119 | 2990128.363 | 2237019.846 | 1749566.072 | 2065950.389 | 1946175.025 | 2513351.11  | 2508501.842 | HMDB00182  |
| 2-aminomuconate(2-)                  | 20907.28515 | 19318.16805 | 21380.0458  | 43394.61775 | 54555.357   | 60609.285   | 25763.9511  | 39325.38035 | 22186.1399  | 37654.71205 | 36028.6508  | 26415.44035 | HMDB01241  |
| 2-oxoadipate(2-)                     | 164577.609  | 125905.8227 | 102209.7907 | 163004.07   | 123165.8145 | 99235.27845 | 138348.4719 | 106162.9063 | 101738.8995 | 148613.3123 | 117282.8223 | 105371.2643 | HMDB00225  |
| Arginine                             | 8579423.332 | 5692834.607 | 10751444.53 | 12386352.02 | 7387487.14  | 7108670.789 | 5033366.352 | 4196182.329 | 4541271.666 | 5035752.668 | 6466941.913 | 7305798.368 | HMDB00517  |
| L-Fucose 1-phosphate                 | 100076.0504 | 85196.5984  | 64162.82695 | 174890.2239 | 37037.14075 | 32842.68105 | 1067402.708 | 1067715.375 | 480833.8691 | 84675.24315 | 81415.0621  | 34919.04275 | HMDB01265  |
| D-Glucosamine 6-phosphate            | 27706.09215 | 16163.86245 | 19480.1863  | 23229.93195 | 32595.9165  | 31083.7549  | 34148.3414  | 27430.60585 | 52003.4393  | 16302.64855 | 17405.6021  | 14438.19095 | HMDB01254  |
| 6-Phosphogluconic acid               | 73674.7123  | 58598.26125 | 63053.58365 | 171510.3694 | 227658.2421 | 230088.9057 | 282606.0931 | 279267.9291 | 532692.1388 | 164759.7937 | 176538.3326 | 314557.8364 | HMDB01316  |
| 4-hydroxybenzoate/Gentisate aldehyde | 2890837.298 | 1832124.449 | 2089028.411 | 2402204.916 | 2457918.762 | 2252831.828 | 2417337.238 | 2220351.533 | 2345799.309 | 1987601.28  | 2024998.026 | 2167633.905 | HMDB00500  |
| 3-hydroxyanthranilate                | 42845.4131  | 54222.23475 | 54599.02475 | 45505.3749  | 57088.5705  | 42194.3296  | 50942.1569  | 51190.0418  | 50926.84075 | 59513.52    | 57616.4091  | 52404.79835 | HMDB01476  |
| quinolate(2-)                        | 88790.19045 | 73825.82355 | 92025.71455 | 109733.2252 | 94134.4577  | 81855.737   | 80000.80055 | 63801.57615 | 109496.2639 | 71749.17975 | 79326.1414  | 75442.09815 | HMDB00232  |
| 2-acetamido-5-oxopentanoate          | 36724.0975  | 29736.73455 | 44901.4727  | 59005.30375 | 30568.8221  | 34212.4815  | 25988.66155 | 23518.23685 | 29482.54115 | 20698.9886  | 23373.98135 | 28796.95795 | HMDB06488  |
| N-acetyl-L-glutamate(2-)             | 153464.7885 | 124140.3747 | 118295.5047 | 315669.9697 | 715600.5645 | 856436.7222 | 686839.2982 | 773918.5232 | 985501.9134 | 248627.9553 | 199310.419  | 243672.9472 | HMDB01138  |
| L-cystathionine                      | 17479.24125 | 11161.75375 | 19233.84445 | 22115.24645 | 17476.1058  | 18203.38245 | 15771.9707  | 14057.09255 | 20253.67015 | 11044.7561  | 13884.63875 | 13127.85865 | HMDB00099  |
| Sedoheptulose 7-phosphate            | 84648.36935 | 59930.0665  | 32182.8682  | 339927.0619 | 626424.3165 | 615385.8719 | 616739.8552 | 615370.5072 | 1294802.973 | 285031.4653 | 302524.1326 | 283662.2868 | METPA0585  |
| sedoheptulose 17-bisphosphate(4-)    | 8918.07355  | 22519.09125 | 26922.80535 | 49758.2126  | 76607.04805 | 80056.2     | 257081.483  | 277195.3893 | 547262.6265 | 61630.264   | 69511.56175 | 111476.1722 | HMDB06274  |
| dopaminium(1+)                       | 7389.0933   | 6626.01765  | 8240.9232   | 15692.74085 | 19555.7253  | 20137.23755 | 12682.6357  | 12614.5502  | 20961.33495 | 12755.6177  | 16478.54805 | 14739.2042  | HMDB00073  |
| suberic acid                         | 43337.32535 | 40646.39695 | 45004.8937  | 37701.8474  | 41529.21475 | 37203.65865 | 32972.56395 | 39116.10255 | 29190.43215 | 38659.6001  | 38241.99955 | 40008.8073  | HMDB00893  |
| 4-pyridoxate                         | 86310.87795 | 62451.64055 | 93407.23725 | 109679.8422 | 63117.00105 | 76600.47935 | 62545.37495 | 48754.18775 | 52682.12855 | 59229.2171  | 68891.9778  | 60791.96685 | HMDB00017  |
| lipoamide                            | 44264.24195 | 33008.1105  | 39149.9945  | 83143.62865 | 278666.5118 | 299003.9275 | 307920.3062 | 317834.1523 | 514415.3125 | 53246.3305  | 58535.893   | 48682.9908  | HMDB00962  |
| lipoate                              | 106378.2109 | 102026.4163 | 108695.4113 | 181380.6955 | 148483.2734 | 141990.085  | 170766.0165 | 173679.8862 | 185058.3224 | 120569.3109 | 127746.9061 | 131915.0528 | NA         |
| fructoseglycine                      | 7878.4014   | 4764.6801   | 10546.0035  | 41663.2305  | 31165.48305 | 33211.97265 | 25152.2212  | 22952.4535  | 50609.7289  | 6968.9246   | 10275.97275 | 9390.11625  | HMDB060278 |
| Sulfate derivative of norepinephrine | 6080.057    | 5157.40245  | 5452.1508   | 10880.3375  | 32474.6241  | 37015.5022  | 44279.4964  | 40071.75715 | 77845.70095 | 17428.3719  | 17269.2786  | 29776.5597  | NA         |

|                                                        |             |             |             |             |             |             |             |             |             |             |             |             |           |
|--------------------------------------------------------|-------------|-------------|-------------|-------------|-------------|-------------|-------------|-------------|-------------|-------------|-------------|-------------|-----------|
| gamma-L-Glutamyl-L-cysteine                            | 1502.23175  | 1244.3034   | 2219.29775  | 1000        | 14612.9347  | 17637.0402  | 41004.372   | 51103.4413  | 38380.08985 | 22475.9506  | 18395.80565 | 16660.97915 | HMDB01049 |
| N2-Formyl-N1-(5-phospho-D-ribose)glycinamide           | 8636.3631   | 3626.9169   | 3796.14175  | 15296.04835 | 14958.265   | 16061.5708  | 40688.99525 | 37939.91915 | 52411.2916  | 6783.60735  | 8784.4858   | 3780.28695  | METPA0491 |
| nonanoate                                              | 15339805.67 | 9213833.006 | 15106712.5  | 15660595.77 | 14162573.63 | 13614754.85 | 13653953.16 | 12834566.45 | 14206310.86 | 10822989.04 | 11192681.32 | 11640219.7  | HMDB00847 |
| (4-hydroxy-3-methoxyphenyl)acetaldehyde                | 36478.1795  | 35138.2345  | 30070.0984  | 30921.92735 | 33964.88995 | 31834.18685 | 38390.0134  | 36452.8457  | 42363.5221  | 32367.84925 | 33735.31995 | 30764.283   | HMDB05175 |
| 4-hydroperoxy-2-nonenal                                | 2627894.013 | 2336369.956 | 2378866.735 | 2175446.738 | 2469608.878 | 2265351.772 | 2520352.359 | 2282392.132 | 2347323.302 | 2269723.274 | 2143497.841 | 2332578.412 | HMDB60287 |
| Azelaic acid                                           | 837331.7288 | 1399432.326 | 933376.7471 | 397460.8238 | 878164.5875 | 780736.6397 | 779725.5421 | 1389017.854 | 445140.7296 | 1270906.477 | 1296082.125 | 1103690.976 | HMDB00784 |
| (R)-Pantothenate                                       | 3164109.54  | 2436692.313 | 3575120.117 | 4247027.421 | 5660303.028 | 7133762.587 | 9912189.985 | 11788599.29 | 11703213.29 | 7203614.862 | 6858167.04  | 8690807.234 | HMDB00210 |
| Deoxyuridine                                           | 8881.9908   | 26706.82935 | 9406.713    | 7096.70985  | 20828.8693  | 30586.9957  | 17341.77815 | 40887.2246  | 58513.20715 | 27920.89375 | 23932.9457  | 22789.9008  | HMDB00012 |
| gamma-L-glutamyl-L-alpha-aminobutyrate                 | 9371.02045  | 3376.64755  | 7866.56695  | 13172.5429  | 18627.3769  | 26860.84245 | 1000        | 4482.6588   | 15647.6016  | 7082.4305   | 7820.4975   | 11883.05465 | NA        |
| Galactosylglycerol                                     | 113140.1997 | 113064.7016 | 70007.7502  | 36299.3906  | 64153.30325 | 83706.80765 | 49990.1027  | 85644.0663  | 78512.9681  | 51718.3284  | 29268.18905 | 15350.54775 | HMDB06790 |
| S-[2-carboxy-1-(1 H-imidazol-4-yl)ethyl]-L-cysteine    | 46730.679   | 36831.26115 | 62102.30765 | 118297.7878 | 150796.7584 | 172758.4978 | 117341.0912 | 83316.22475 | 107795.1181 | 87270.0892  | 97027.17345 | 124545.1644 | NA        |
| N-acetyl-seryl-aspartate                               | 33889.0961  | 34332.8087  | 26235.198   | 68925.91535 | 147839.639  | 163296.4956 | 93443.04515 | 92203.6895  | 166391.4545 | 55690.03995 | 51344.6586  | 64211.4693  | NA        |
| 3-Deoxy-D-glycero-D-galacto-2-nonulosonic acid         | 123246.5265 | 139153.456  | 133412.1254 | 246643.9527 | 344516.1066 | 380375.1124 | 393897.8447 | 366136.4791 | 487458.1272 | 166271.815  | 182651.3242 | 173451.535  | HMDB00425 |
| CMP(2-)                                                | 9546.02885  | 7944.062    | 6962.23155  | 47103.68845 | 35836.4134  | 37096.0255  | 83632.1662  | 44643.5442  | 41995.8891  | 28226.5961  | 31984.97105 | 22026.1713  | HMDB00095 |
| UMP/3-UMP                                              | 21819.55575 | 9631.36715  | 12169.857   | 74604.7721  | 55493.38705 | 56989.2365  | 285345.0244 | 154265.7332 | 91689.20075 | 59019.09155 | 61572.9359  | 58972.99585 | HMDB00288 |
| 5-Amino-1-(5-Phospho-D-ribose)imidazole-4-carboxamide  | 77290.67225 | 50089.86505 | 80006.49025 | 77597.1058  | 31580.2575  | 27288.08295 | 15822.41655 | 13677.88535 | 4101.773    | 39868.4176  | 45954.78835 | 48341.3314  | HMDB01439 |
| 2-keto-3-deoxy-D-glycero-D-galactonic acid 9-phosphate | 539620.5821 | 334309.5887 | 444376.0644 | 581980.6921 | 347585.7401 | 315930.2462 | 707280.7779 | 587832.7082 | 431627.0253 | 224158.663  | 271922.0256 | 302183.5261 | NA        |
| Perillic acid                                          | 170353.9345 | 158768.1978 | 145399.4391 | 112948.0251 | 147500.7605 | 147175.9572 | 125556.4184 | 124052.354  | 135494.365  | 132960.4252 | 117995.6001 | 137370.6098 | HMDB04586 |
| trans-45-epoxy-2(E)-decenal                            | 65694.344   | 54844.29095 | 61650.0884  | 51949.24175 | 68585.01905 | 66705.0224  | 49877.3896  | 44929.0941  | 56541.5731  | 57531.71365 | 51219.507   | 58614.90825 | NA        |
| caprate                                                | 6341796.03  | 3918361.065 | 6160167.701 | 6258326.689 | 6086253.461 | 5927092.169 | 5803517.395 | 5486385.618 | 6012406.701 | 4665575.64  | 4790900.044 | 5034851.355 | HMDB00511 |
| w-hydroxydecanoic acid                                 | 459575.1814 | 364894.39   | 311599.3627 | 313729.036  | 431373.1579 | 421591.9946 | 400208.2976 | 383967.2535 | 440204.4312 | 371535.0301 | 331556.3346 | 382502.0587 | HMDB02203 |
| kynurenate                                             | 10106.13495 | 7487.02775  | 10196.7848  | 13692.3451  | 12492.14925 | 15419.26675 | 8735.58455  | 9883.63905  | 9152.65565  | 10444.3871  | 12825.26295 | 11737.97855 | HMDB00715 |
| o-methylhippurate                                      | 50581.41135 | 35202.0853  | 50175.1679  | 65625.7139  | 52055.0908  | 66840.3898  | 49563.21105 | 38564.1542  | 52281.80695 | 39526.6924  | 51570.20345 | 42617.74465 | NA        |
| sebacic acid                                           | 51094.32235 | 62871.99405 | 55539.75865 | 35446.08275 | 48501.1213  | 52276.7386  | 47247.69395 | 55705.9726  | 45405.0098  | 57525.30655 | 55473.25275 | 54678.8283  | HMDB00792 |
| Thymidine                                              | 21718.7381  | 16574.5016  | 22710.73255 | 19389.75255 | 24770.39775 | 23117.5294  | 29310.07475 | 33566.92785 | 30935.53845 | 26541.1668  | 21412.50165 | 21163.9948  | HMDB00273 |
| N(omega)-(L-Arginino)succinate                         | 33114.33445 | 25292.5138  | 25053.22015 | 65677.54835 | 128020.0963 | 111947.9613 | 117633.4648 | 130607.3838 | 203503.2085 | 26059.7357  | 30259.6139  | 56214.8847  | HMDB00052 |
| L-tryptophan                                           | 4413940.871 | 2728157.278 | 5193281.527 | 6707537.544 | 5165370.062 | 5045542.167 | 4906216.226 | 4069877.879 | 5410452.186 | 3360794.576 | 4025384.1   | 3981789.616 | HMDB00929 |
| 5-Methoxyindoleacetate                                 | 56509.5788  | 47908.88735 | 60116.0973  | 74561.4294  | 62716.08765 | 61772.7469  | 53872.84345 | 48235.22405 | 56572.37505 | 48472.95845 | 63508.8101  | 65728.6511  | HMDB04096 |

|                                                                                 |             |             |             |             |             |             |             |             |             |             |             |             |           |
|---------------------------------------------------------------------------------|-------------|-------------|-------------|-------------|-------------|-------------|-------------|-------------|-------------|-------------|-------------|-------------|-----------|
| salsolinol 1-carboxylate                                                        | 22065.74735 | 19557.17255 | 30714.05075 | 43946.29685 | 38194.5322  | 44479.3507  | 38493.4444  | 40271.3632  | 43187.3061  | 33077.23025 | 35435.096   | 34582.0298  | HMDB13068 |
| laurate                                                                         | 9682125.519 | 10032378.06 | 10055385.8  | 7839614.053 | 8128440.348 | 7474683.526 | 7836943.007 | 8363855.096 | 7604211.569 | 7014895.793 | 6848710.829 | 7198405.588 | HMDB00638 |
| omega hydroxy dodecanoate (n-C12:0)                                             | 217635.4996 | 185170.7431 | 162473.8399 | 137577.6065 | 189298.4481 | 191226.6626 | 159809.9493 | 160578.3629 | 179578.6087 | 170121.9575 | 156056.9365 | 173974.8082 | NA        |
| Dodecanedioic acid                                                              | 326579.787  | 310844.4996 | 301324.9761 | 262362.6327 | 322294.8766 | 310026.149  | 292510.6909 | 304352.391  | 354087.4175 | 298941.6831 | 275246.02   | 299315.9475 | HMDB00623 |
| fructosyllisine                                                                 | 47076.59795 | 9748.04335  | 64630.4303  | 213840.7075 | 16049.3593  | 9444.06905  | 12763.59025 | 4654.2032   | 6055.61555  | 11377.002   | 10139.0551  | 5910.3526   | NA        |
| tetradecenoate (n-C14:1)                                                        | 329100.4624 | 265441.2502 | 307604.7749 | 259603.7841 | 300689.0986 | 299051.3394 | 313746.6594 | 310024.8239 | 317102.471  | 252619.7658 | 255634.0175 | 283177.5711 | NA        |
| myristate                                                                       | 11885766.61 | 11730799.28 | 9777641.929 | 8510809.487 | 9660791.238 | 9621492.264 | 9328322.035 | 10210863.59 | 10379838.88 | 8999310.694 | 8800016.371 | 10842749.89 | HMDB00806 |
| 6(S)-hydroxy-tetradeca-2E4E8Z-trienoate/6(R)-hydroxy-tetradeca-2E4E8Z-trienoate | 488741.9706 | 439023.9995 | 405761.6432 | 311835.6248 | 399419.0279 | 419922.6374 | 349279.8032 | 374003.6017 | 362096.3309 | 377199.4535 | 353628.7894 | 405958.128  | NA        |
| omega hydroxy tetradecanoate (n-C14:0)                                          | 99402.4555  | 98010.98765 | 80312.4131  | 55658.66875 | 90993.418   | 90523.74265 | 78088.84885 | 74718.89945 | 94879.9833  | 78800.61715 | 72522.3207  | 99822.59205 | NA        |
| 3(S)6(R)-dihydroxy-tetradec-8Z-enoate/3(S)6(S)-dihydroxy-tetradec-8Z-enoate     | 698624.5641 | 515149.8804 | 688132.1454 | 983815.3344 | 974018.7586 | 984685.8463 | 743873.0709 | 638449.4682 | 812830.0032 | 771720.8983 | 760161.7625 | 592173.8358 | NA        |
| pentadecanoate                                                                  | 2643174.09  | 2172565.971 | 2401545.855 | 2249670.673 | 2422887.238 | 2438686.341 | 2335568.151 | 2433653.235 | 2729005.374 | 2287814.458 | 2180146.837 | 2515939.949 | HMDB00826 |
| palmitoleate                                                                    | 707922.807  | 871732.2643 | 712599.1092 | 917974.4481 | 692866.948  | 619382.7755 | 889026.3457 | 968582.4781 | 887743.6527 | 533183.2012 | 555567.8534 | 557814.8191 | HMDB03229 |
| palmitate                                                                       | 61482397.28 | 67036783.29 | 48607815.73 | 47236004.93 | 55973056.07 | 58831357.65 | 76048577.16 | 80000930.97 | 81707970.97 | 68042330.06 | 62072245.19 | 68050587.65 | HMDB00220 |
| omega hydroxy hexadecanoate (n-C16:0)                                           | 1148840.326 | 1061682.211 | 950000.8166 | 736770.5611 | 1098198.784 | 1125348.037 | 937225.3862 | 942974.4198 | 1113883.472 | 933761.415  | 833619.365  | 1068914.22  | HMDB06294 |
| 11'-Carboxy-alpha-chromanol                                                     | 857527.6429 | 753815.1123 | 728726.9484 | 428317.2127 | 692878.0428 | 672546.1253 | 435108.4887 | 435422.6859 | 578744.4515 | 507003.2072 | 505866.5938 | 728834.1811 | HMDB12515 |
| Hexadecanedioic acid                                                            | 324884.1752 | 306277.7118 | 290193.5786 | 216555.2752 | 292498.2495 | 293054.7925 | 271610.2562 | 258622.4127 | 288453.6564 | 266812.1446 | 245270.0207 | 295898.437  | HMDB00672 |
| margarate                                                                       | 408993.0419 | 394577.2737 | 373528.7805 | 358228.4729 | 356858.9889 | 337751.2853 | 357457.3069 | 376241.4406 | 348422.5185 | 380167.0322 | 338304.5444 | 356728.6491 | HMDB02259 |
| stearate                                                                        | 3011910.545 | 4382869.212 | 2739198.898 | 3217624.187 | 4247480.342 | 4764606.491 | 4780425.675 | 5399426.194 | 4378331.478 | 5549348.441 | 4616527.256 | 4593284.32  | HMDB00827 |
| 12,13-epoxy-9-hydroperoxy-10E-octadecenoate                                     | 41065.7074  | 40989.06315 | 42272.7313  | 24186.70475 | 29135.4239  | 31050.8793  | 21063.6211  | 19660.1975  | 22826.23315 | 32439.8831  | 29501.47025 | 44056.7672  | NA        |
| 8,11,14-Eicosatrienoic acid (DGLA)                                              | 53527.07125 | 48468.87225 | 68926.97695 | 103803.6884 | 51044.6825  | 49386.2119  | 31519.69155 | 24799.7457  | 22233.1673  | 41950.27395 | 49446.66445 | 54648.95855 | HMDB02925 |
| Eicosenoic acid                                                                 | 40151.96845 | 53658.892   | 44830.2564  | 65760.6219  | 69483.39585 | 67963.50925 | 41034.2935  | 47797.8776  | 37644.0385  | 23096.0371  | 23382.49035 | 27380.92125 | HMDB02231 |
| CTP(4-)                                                                         | 186915.9992 | 229743.7415 | 164161.2028 | 474150.5228 | 1349998.048 | 995467.6338 | 877767.8484 | 942345.9868 | 1413781.2   | 523482.8772 | 439683.0391 | 397434.9439 | HMDB00082 |
| UTP(4-)                                                                         | 894259.7711 | 1043126.641 | 597615.2665 | 1734325.935 | 4380498.695 | 3068045.083 | 3067397.515 | 3552809.56  | 4830860.286 | 1785043.031 | 1454838.203 | 1462250.382 | HMDB00285 |
| (R)-S-lactoylglutathionate(1-)                                                  | 288419.2294 | 274225.9659 | 110022.4329 | 104300.0138 | 386740.7868 | 419510.0949 | 1076289.945 | 1132215.825 | 1650965.936 | 323508.0389 | 256301.7427 | 309694.6593 | HMDB01066 |
| UDP-alpha-D-xylose(2-)                                                          | 9941.7427   | 6765.7792   | 6114.41695  | 24963.63965 | 38521.5048  | 45329.8255  | 48451.8405  | 46171.3866  | 75397.06285 | 28050.0714  | 32106.5181  | 29487.6216  | HMDB01018 |
| UDP-D-glucuronate                                                               | 19857.4412  | 19217.9132  | 12583.82315 | 29929.17385 | 54027.7793  | 58498.93285 | 91087.6462  | 83606.59135 | 301878.917  | 37971.97195 | 35757.03955 | 36787.77065 | HMDB00935 |
| GDP-D-mannose                                                                   | 26216.3864  | 33795.83345 | 17133.36855 | 59897.9247  | 60522.54125 | 70755.4453  | 108260.6678 | 100348.7532 | 100132.6095 | 79955.8756  | 65513.19915 | 39395.6232  | HMDB01163 |

|                                                                   |             |             |             |             |             |             |             |             |             |             |             |             |           |
|-------------------------------------------------------------------|-------------|-------------|-------------|-------------|-------------|-------------|-------------|-------------|-------------|-------------|-------------|-------------|-----------|
| NADH(2-)                                                          | 19571.4114  | 7611.4946   | 12901.55435 | 39868.14045 | 51544.415   | 56258.45095 | 157981.37   | 140027.436  | 277901.5573 | 21127.3412  | 14341.91995 | 23555.5091  | HMDB01487 |
| docosanedioicacid                                                 | 7940.39365  | 13655.6784  | 6318.33435  | 5186.9806   | 10858.47745 | 6593.7211   | 5649.2772   | 8980.8185   | 6698.2874   | 7088.4214   | 9758.4837   | 9091.6482   | NA        |
| glycochenodeoxycholate                                            | 42153.07335 | 19883.84875 | 45789.23935 | 74597.2281  | 44453.80125 | 37176.37375 | 37006.7309  | 22105.6955  | 34757.4153  | 23912.1834  | 33055.0045  | 45019.73235 | HMDB00637 |
| tauroolithocholate                                                | 27237.1345  | 19671.6952  | 28123.37805 | 37326.5794  | 27231.9432  | 22970.9481  | 19494.2945  | 16763.72195 | 13936.7929  | 21249.41425 | 21360.44675 | 22545.7731  | HMDB00722 |
| taurocholic acid                                                  | 30645.54685 | 21778.29715 | 29372.46715 | 33580.09705 | 25459.6811  | 19250.4488  | 19434.2817  | 14236.0602  | 15976.98385 | 13576.494   | 19954.55905 | 25936.65475 | HMDB00036 |
| cholesterol sulfate                                               | 29570.0738  | 73336.50545 | 17082.87805 | 1671.7653   | 11830.4648  | 13156.8955  | 5424.32295  | 16384.21885 | 12887.7029  | 18051.759   | 5153.41575  | 13248.1948  | HMDB00653 |
| 3-oxopropanoate                                                   | 1139154.707 | 899265.5424 | 1158842.484 | 1320629.31  | 984697.2085 | 928066.1285 | 1308211.327 | 1159105.04  | 1304708.948 | 906505.4829 | 995810.4489 | 971976.4379 | HMDB11111 |
| 3-hydroxypropionate/D-glyceraldehyde/glycerone                    | 7772610.903 | 6028589.319 | 8425536.884 | 9606018.88  | 6593527.956 | 6082640.604 | 6527567.904 | 5437254.695 | 6544632.216 | 5795482.344 | 6631125.323 | 6786208.708 | HMDB00700 |
| Malonate/3-hydroxypyruvate                                        | 115759.5898 | 84463.46205 | 128534.7638 | 60468.06685 | 54386.45725 | 44145.51615 | 50673.0436  | 57103.99935 | 46004.95625 | 59317.2797  | 48550.55995 | 54813.5047  | HMDB00691 |
| D-glycerate                                                       | 493281.394  | 354301.7529 | 656358.0985 | 760578.3416 | 514921.3949 | 415950.7501 | 483802.1212 | 331444.0703 | 401008.0111 | 367452.3787 | 420146.9576 | 492035.7558 | HMDB00139 |
| D-Glycerate 3-phosphate/D-Glycerate 2-phosphate                   | 388643.9531 | 485184.4723 | 527680.9548 | 717668.1092 | 1028931.883 | 1087934.133 | 974402.734  | 2160113.774 | 1019406.641 | 923666.1163 | 1025659.631 | 1090007.77  | HMDB00807 |
| 1,3-diphosphoglycerate /2,3-diphosphoglycerate /(1,3BPG or2,3BPG) | 79086.9809  | 103011.6307 | 97241.0654  | 38150.8816  | 28159.86615 | 24295.4528  | 20424.75955 | 30780.0309  | 26315.5277  | 92299.59535 | 82287.7019  | 58549.48895 | HMDB01270 |
| C4H6O3(3)                                                         | 5018656.139 | 3768380.829 | 4314577.079 | 5532999.074 | 3694668.301 | 3109902.127 | 3688594.185 | 2784468.724 | 2624628.327 | 3831135.164 | 3643191.522 | 3241281.625 |           |
| C4H8O3(3)                                                         | 1717310.701 | 2383814.895 | 1207278.008 | 1501805.724 | 1436015.834 | 3414251.568 | 961802.2964 | 2079065.458 | 1089985.717 | 2598903.86  | 1762416.136 | 1882173.087 |           |
| 5,6-dihydrouracil/L-3-Cyanoalanine                                | 788810.6469 | 535570.5954 | 751862.2051 | 984769.5089 | 1128654.766 | 1124857.976 | 592231.9288 | 504841.7749 | 643551.5132 | 570342.2935 | 604454.1747 | 643882.2513 | HMDB00076 |
| Methylmalonate                                                    | 7283043.537 | 3160919.76  | 7009363.483 | 8275173.493 | 5646668.332 | 2794596.389 | 11199887.44 | 4572810.049 | 13023945    | 2834673.266 | 3171707.738 | 3429917.353 | HMDB00202 |
| 5-oxoproline/L-1-Pyrroline-3-hydroxy-5-carboxylate                | 140326555.2 | 45371995.71 | 151410949   | 315903937   | 195039427.6 | 144119704.4 | 196043087.4 | 99561532.89 | 181021836.9 | 95656899.28 | 154711454.5 | 184561213   | HMDB00267 |
| itaconate/Mesaconate                                              | 592442.1638 | 533515.3447 | 510301.2611 | 699810.7325 | 818253.6607 | 777027.7918 | 1387482.733 | 1505780.742 | 2493801.271 | 743343.0144 | 710666.6095 | 643591.6377 | HMDB02092 |
| L-4-hydroxyglutamate semialdehyde                                 | 12160764.33 | 8724827.85  | 11122351.65 | 25795266.01 | 26093321.86 | 28890792.17 | 59408387.55 | 51254461.39 | 84464872.51 | 15927708.88 | 17265908.43 | 19176794.35 | HMDB06556 |
| C5H10O5(6)                                                        | 734562.6674 | 532024.7526 | 835585.3529 | 969709.3267 | 698603.1098 | 647414.5759 | 578087.9508 | 452443.6156 | 588893.825  | 564426.5845 | 640488.8174 | 683935.4922 | NA        |
| L-arabinitol/xylitol/D-ribitol                                    | 533988.9659 | 408129.3888 | 563943.8907 | 750310.0207 | 603869.1548 | 559465.3377 | 567652.058  | 524125.4584 | 895192.632  | 413677.3612 | 463438.8619 | 483025.1277 | NA        |
| L-xylonate/L-lyxonate                                             | 1081768.496 | 747911.199  | 1153923.172 | 2092773.629 | 2245953.669 | 2241397.366 | 1428035.018 | 1337242.101 | 2245794.738 | 982517.0322 | 1078260.821 | 1064652.658 | HMDB60256 |
| 2-deoxy-D-ribose 5-phosphate/2-Deoxy-D-ribose 1-phosphate         | 9864.6358   | 10335.93145 | 11201.73435 | 156781.9871 | 77806.84355 | 75519.85335 | 169220.5184 | 150633.734  | 88283.83085 | 48255.3852  | 41616.25645 | 23091.20685 | HMDB01031 |
| C5H11O8P(5)                                                       | 138849.0014 | 139833.3483 | 142634.1909 | 443470.8747 | 482135.593  | 464640.3593 | 913719.5854 | 943101.9903 | 2687400.496 | 289185.6084 | 306697.2395 | 408107.09   | NA        |
| 1-piperideine-6-carboxylate/1-piperideine-2-carboxylate           | 41102.83185 | 40721.2429  | 45244.5698  | 44696.3822  | 37677.9834  | 37451.4188  | 46701.65765 | 44974.7044  | 44182.1782  | 39492.9236  | 38177.3175  | 39051.7037  | NA        |
| 3-methyl-2-oxopentanoate/4-methyl-2-oxopentanoate(ketoleucine)    | 20069343.27 | 17207706.44 | 16943436.56 | 16827635.34 | 18943839.41 | 18509624.66 | 17788886.96 | 17577249.5  | 18847918.25 | 18121982.15 | 18144057.66 | 18861387.28 | HMDB00491 |

|                                                                                     |             |             |             |             |             |             |             |             |             |             |             |             |            |
|-------------------------------------------------------------------------------------|-------------|-------------|-------------|-------------|-------------|-------------|-------------|-------------|-------------|-------------|-------------|-------------|------------|
| L-2-aminoadipate(1-)                                                                | 171583.5583 | 126888.4455 | 154094.8876 | 171578.2887 | 126148.4731 | 115082.7816 | 126633.2856 | 117034.7571 | 188825.7438 | 77576.265   | 75537.27585 | 88457.5405  | HMDB00510  |
| L-fucose/L-Fuculose                                                                 | 182204.1329 | 153849.2084 | 191690.6872 | 238589.7764 | 162579.7109 | 150141.702  | 142726.8902 | 119440.063  | 153680.9396 | 114327.2862 | 123360.1807 | 134734.3794 | HMDB00174  |
| cis-aconitate/dehydroascorbate                                                      | 674700.841  | 491367.8866 | 606811.8781 | 1215714.253 | 808701.0485 | 681388.5072 | 1285420.978 | 875672.4214 | 1028023.867 | 962430.7293 | 1137294.764 | 772971.065  | HMDB00072  |
| N-Formimidoyl-L-glutamate                                                           | 15145.71135 | 5763.9146   | 18272.27675 | 17897.2909  | 9541.1741   | 10344.97195 | 1805.81505  | 1484.6188   | 6212.3608   | 2599.72845  | 5015.95335  | 9176.6638   | HMDB00854  |
| N-acetyl-L-aspartate/2-Amino-3-oxoadipate                                           | 968318.2253 | 881883.0924 | 586974.0986 | 4714302.455 | 6365507.902 | 6931197.282 | 3179841.285 | 4253973.702 | 1893126.158 | 3503369.819 | 3188780.233 | 2205140.209 | HMDB00812  |
| D-glucurono-6,3-lactone                                                             | 381830.8107 | 285450.7758 | 153716.9413 | 273224.994  | 359236.2873 | 342653.505  | 1225022.465 | 1136630.033 | 1501966.92  | 206447.9879 | 256928.4488 | 196308.6843 | HMDB06355  |
| 3-Keto-beta-D-galactose/L-Gulonolactone                                             | 140518.2024 | 128815.5201 | 142633.7838 | 152953.0297 | 144397.1626 | 124627.7206 | 126499.7095 | 129395.0234 | 165168.0417 | 127726.4149 | 134893.0209 | 130790.6984 | HMDB01385  |
| C6H12O6(5)                                                                          | 8454741.793 | 6342403.894 | 7194987.015 | 9192579.015 | 8164149.926 | 8060807.166 | 4495972.644 | 4002734.116 | 5953487.402 | 12589196.33 | 12691132.72 | 10303553.1  | NA         |
| L-Iditol/D-glucitol/galactitol                                                      | 1938280.846 | 1451313.326 | 1944392.827 | 2449130.765 | 1978802.96  | 1852189.713 | 2545894.23  | 2319468.192 | 2923313.332 | 1552363.924 | 1699612.874 | 1765226.497 | NA         |
| citrate/isocitrate/Diketogulonic acid                                               | 24357066.4  | 24500124.89 | 27990688.72 | 36928685.51 | 35843704.92 | 35261133.25 | 43794087.38 | 43066646.66 | 40928711.7  | 48060331.02 | 47361939.08 | 38144574.43 | HMDB00094  |
| 3-dehydro-L-gulonate/D-glucuronate/L-iduronate                                      | 110664.6983 | 73051.34065 | 97149.78275 | 126221.0622 | 127148.2545 | 124581.4868 | 130248.9594 | 117501.5247 | 308984.4056 | 57256.06395 | 59004.2589  | 78932.85305 | HMDB06334  |
| L-gulonate                                                                          | 936805.0344 | 723610.4441 | 894310.5521 | 2392318.691 | 3898031.268 | 4103228.377 | 3538478.918 | 3404172.836 | 7847531.366 | 1019673.82  | 1070156.659 | 1143448.491 | HMDB03290  |
| D-gluconate                                                                         | 936805.0344 | 723610.4441 | 894310.5521 | 2392318.691 | 3898031.268 | 4103228.377 | 3538478.918 | 3404172.836 | 7847531.366 | 1019673.82  | 1070156.659 | 1143448.491 | HMDB00625  |
| 5-Methylthio-5-deoxy-D-ribose 1-phosphate/5-Methylthio-5-deoxy-D-ribose 1-phosphate | 1000        | 1000        | 1000        | 1000        | 1937.14985  | 2407.8986   | 11124.58565 | 14887.02985 | 13720.9357  | 1000        | 1000        | 1218.74965  | HMDB01299  |
| G6P/F6P                                                                             | 842045.4639 | 641484.5315 | 510513.1329 | 2881845.268 | 4325835.365 | 4076496.197 | 4714789.199 | 4630301.703 | 8631748.178 | 1893839.843 | 1944780.398 | 1809764.332 | HMDB01401  |
| beta-D-Fructose 1,6-bisphosphate                                                    | 568347.2407 | 606034.5853 | 672151.8541 | 981165.9331 | 1064410.137 | 1067408.168 | 4319595.931 | 4764372.923 | 12810315.6  | 1257948.609 | 1375616.236 | 2673495.119 | HMDB06044  |
| Methylisocitric acid/2-methylcitrate                                                | 106378.2109 | 102026.4163 | 108695.4113 | 181380.6955 | 148483.2734 | 141990.085  | 170766.0165 | 173679.8862 | 185058.3224 | 120569.3109 | 127746.9061 | 131915.0528 | HMDB06471  |
| phenylacetate/(4-hydroxyphenyl)acetaldehyde                                         | 66826260.41 | 57166302.54 | 55047912.15 | 42885133    | 58622859.4  | 56511196.54 | 47254587.53 | 47339888.75 | 52018629.77 | 53636722.51 | 48606488.39 | 58462467.69 | HMDB00209  |
| 4-Hydroxyphenylacetate/2-Hydroxyphenylacetate/3,4-Dihydroxyphenylacetaldehyde       | 514232.8331 | 463667.659  | 437737.2573 | 376699.9138 | 430579.5714 | 423938.1432 | 347725.1699 | 351835.3771 | 381338.0144 | 428268.2197 | 387069.4096 | 425487      | HMDB00020  |
| N-formylanthranilate/noradrenochrome                                                | 20197.28745 | 17571.1114  | 29282.1526  | 26893.4927  | 20523.3973  | 18268.3417  | 14922.73625 | 15139.7903  | 15244.53865 | 15308.4679  | 24533.7829  | 27777.09205 | HMDB04089  |
| C8H16NO9P(4)                                                                        | 59719.58415 | 48368.8389  | 39813.5987  | 478152.5473 | 916414.9838 | 911174.9208 | 691828.6534 | 716346.3568 | 1124028.571 | 360383.4592 | 374792.3119 | 357427.5623 | NA         |
| 4-oxo-2-nonenal                                                                     | 201641.5597 | 177697.3498 | 180070.6833 | 172201.0115 | 207814.4856 | 195364.9202 | 178817.9395 | 166830.2046 | 189721.9947 | 176841.4119 | 166270.7628 | 191219.9334 | HMDB060285 |
| 4-hydroxy-2-nonenal/3,4-epoxynonanal                                                | 3116545.261 | 1946038.149 | 2910267.352 | 2850660.899 | 2792333.208 | 2687220.266 | 2607107.847 | 2414674.285 | 2710946.956 | 2171602.75  | 2175903.27  | 2369495.774 | HMDB04362  |
| adrenochrome/N-benzoylglycinate                                                     | 1199709.827 | 1052266.036 | 1282257.098 | 1705877.71  | 1645317.487 | 1749113.073 | 1488837.227 | 1616868.689 | 2510306.995 | 1438713.649 | 1558005.415 | 1496083.432 | HMDB12884  |

|                                                                                         |             |             |             |             |             |             |             |             |             |             |             |             |           |
|-----------------------------------------------------------------------------------------|-------------|-------------|-------------|-------------|-------------|-------------|-------------|-------------|-------------|-------------|-------------|-------------|-----------|
| trans-caffeate/3-(4-hydroxyphenyl)pyruvate                                              | 21183.2291  | 34476.69305 | 19215.8352  | 17118.73725 | 18036.465   | 22952.85645 | 13087.31045 | 28639.39355 | 14107.8079  | 27500.2944  | 25307.8756  | 25208.18335 | HMDB03501 |
| Homovanillate/3-(4-hydroxyphenyl)lactate/3-Methoxy-4-hydroxyphenylglycolaldehyde        | 147387.3269 | 141293.1011 | 141726.8269 | 179894.4934 | 213100.7927 | 238062.5853 | 196455.8312 | 224770.1823 | 467176.1199 | 158757.9728 | 151043.5554 | 163375.5852 | HMDB00118 |
| 2-Carboxy-2,3-dihydro-5,6-dihydroxyindole/L-dopaquinone                                 | 6480.44125  | 12693.8481  | 10478.72175 | 19660.86995 | 8451.09065  | 47289.2875  | 3390.0561   | 11906.0949  | 2338.3621   | 21588.6108  | 10034.382   | 11963.25645 | HMDB04067 |
| cytidine                                                                                | 201695.883  | 128954.6634 | 199121.2092 | 379118.341  | 496243.4385 | 529067.382  | 471669.5447 | 327528.1583 | 662802.9018 | 185904.4294 | 221429.84   | 209865.2037 | HMDB00089 |
| AMP/dGMP/3-AMP                                                                          | 147217.9723 | 93710.78115 | 113329.7729 | 374088.3998 | 165510.4236 | 189839.7358 | 928046.7183 | 547378.6922 | 161628.4719 | 274166.5955 | 283698.3584 | 289269.7385 | HMDB00045 |
| 4(R)-hydroxy-dodec-6Z-enoate/4(S)-hydroxy-dodec-6Z-enoate                               | 1034044.399 | 890940.0666 | 878316.9681 | 791264.6267 | 1035254.662 | 1094075.067 | 954051.2491 | 965930.3333 | 1081790.067 | 907912.0653 | 802208.8568 | 989052.5741 | NA        |
| C12H22O11(6)                                                                            | 172837.4788 | 146852.3909 | 82374.7859  | 56908.98475 | 48423.5112  | 32543.6091  | 61542.4858  | 94888.76855 | 29587.0511  | 93965.51995 | 44321.0199  | 52410.689   | NA        |
| C14H24O3(4)                                                                             | 131015.7875 | 116630.5595 | 117342.8811 | 83921.85005 | 126835.103  | 130419.9064 | 90753.9916  | 101721.741  | 122101.5353 | 111341.8896 | 99073.2138  | 125945.7689 | NA        |
| 3-oxo-6(R)-hydroxy-tetradec-8-cis-enoate/3-oxo-6(S)-hydroxy-tetradec-8Z-enoate          | 680398.9768 | 614431.6412 | 587689.4446 | 441795.8767 | 597150.1319 | 626030.8834 | 518064.9037 | 537752.3386 | 559681.5962 | 540379.6651 | 518294.0309 | 621452.5488 | NA        |
| 8(R)-hydroxy-hexadeca-2E4E6E10Z-tetraenoate/8(S)-hydroxy-hexadeca-2E4E6E10Z-tetraenoate | 21076.1507  | 20262.18335 | 22931.2365  | 12798.22415 | 24048.4312  | 24339.0216  | 12524.8211  | 15064.84755 | 20856.08535 | 11058.18155 | 13934.73915 | 22639.9288  | NA        |
| C16H26O3(4)                                                                             | 25199.5763  | 21326.40425 | 28034.8791  | 17453.19275 | 36498.67285 | 34372.3582  | 32329.73245 | 23647.8664  | 65776.93915 | 19297.33545 | 23289.5411  | 26197.6549  | NA        |
| 3-oxo-8(R)-hydroxy-hexadeca-6E10Z-dienoate/3-oxo-8(S)-hydroxy-hexadeca-6E10Z-dienoate   | 81299.08125 | 77412.8087  | 69469.0241  | 53686.1112  | 79344.8681  | 84529.7239  | 52753.5633  | 59344.5434  | 60259.03685 | 69685.3592  | 54881.78385 | 67606.0677  | NA        |
| linoleic acid/linoelaidic acid (all trans C18:2)/octadecadienoate (n-C18:2)             | 4286740.937 | 9002440.067 | 6256892.233 | 3722826.711 | 2650358.66  | 1383719.857 | 2492887.262 | 4377315.434 | 1306369.824 | 3228006.845 | 3045549.669 | 1606913.797 | HMDB00673 |
| oleic acid/elaidate/trans-vaccenate                                                     | 2501420.888 | 3822742.741 | 2843482.747 | 2888089.177 | 2394284.147 | 1869920.009 | 2631964.56  | 3149780.53  | 2002833.55  | 1734341.424 | 1641596.574 | 1324810.648 | HMDB00207 |
| 9(10)-EpOME/12(13)-EpOME                                                                | 163023.5644 | 197725.4317 | 158916.9177 | 125285.3227 | 129949.7632 | 117846.6419 | 108948.2366 | 141966.9024 | 117577.1068 | 133418.8269 | 117090.3909 | 135654.8291 | HMDB04701 |
| 9,10-hydroxyoctadec-12(Z)-enoate/12,13-hydroxyoctadec-9(Z)-enoate                       | 296812.2084 | 294006.9406 | 276345.7848 | 185438.3129 | 231810.9572 | 212993.0381 | 192240.863  | 216207.0701 | 222859.4572 | 210681.0799 | 202229.1501 | 245467.2235 | HMDB04704 |
| pristanic acid                                                                          | 120494.698  | 108618.0661 | 117619.457  | 85193.40815 | 90535.8448  | 82052.791   | 77506.4385  | 75668.07265 | 88036.1853  | 83978.9326  | 87301.16445 | 104870.4172 | HMDB00795 |
| C20H30O2(4)                                                                             | 51953.97425 | 34959.7534  | 48993.7165  | 84043.9756  | 47666.4023  | 56586.56175 | 27020.6358  | 28874.9991  | 27529.5098  | 55490.92755 | 49890.7957  | 60966.4223  | NA        |
| arachidonic acid                                                                        | 295578.6344 | 260333.6337 | 382259.1718 | 379499.0384 | 220687.7368 | 185411.4179 | 159942.162  | 140753.9164 | 113635.2694 | 389690.9686 | 395182.9068 | 384444.6455 | HMDB01043 |



|                                                                     |             |             |             |             |             |             |             |             |             |             |             |             |           |
|---------------------------------------------------------------------|-------------|-------------|-------------|-------------|-------------|-------------|-------------|-------------|-------------|-------------|-------------|-------------|-----------|
| phytanic acid/arachidic acid                                        | 79479.05375 | 75872.65785 | 76458.3069  | 59357.05295 | 58450.4207  | 57524.9027  | 48996.31485 | 56358.4265  | 48754.14865 | 64022.58525 | 57886.2397  | 70833.5996  | HMDB00801 |
| C20H32O3(12)                                                        | 13598.90585 | 14371.5134  | 17765.74015 | 16534.3898  | 10245.12645 | 12580.67085 | 7608.8071   | 15928.5204  | 11160.7291  | 12216.26455 | 17678.30735 | 13965.87535 | NA        |
| C20H32O4(21)                                                        | 44155.19175 | 52854.95575 | 51602.4435  | 32137.78395 | 31732.09455 | 23307.32145 | 28311.6851  | 43987.22445 | 57649.15165 | 26269.1629  | 69139.23525 | 74386.79275 | NA        |
| C20H34O4(4)                                                         | 17261.4202  | 25044.0908  | 7450.22055  | 21960.7     | 19357.6478  | 31746.87535 | 29135.35665 | 36171.314   | 44094.92455 | 39729.1049  | 34263.26295 | 27906.91125 | NA        |
| C20H30O5(11)                                                        | 37310.96715 | 27258.3255  | 52027.6492  | 36578.80325 | 16965.5477  | 10210.24095 | 26778.92185 | 70241.14625 | 17437.5924  | 38817.24975 | 49798.0567  | 37355.30835 | NA        |
| C20H32O5(15)                                                        | 46901.674   | 52907.00835 | 44724.05655 | 33868.85445 | 46217.2962  | 26865.8167  | 50544.818   | 65003.767   | 53839.0087  | 47274.40085 | 52804.1286  | 89985.06625 | NA        |
| docosaheptaenoate(DHA)                                              | 234419.2483 | 230647.7685 | 305903.7962 | 354159.8891 | 197299.0567 | 198100.9412 | 155693.4647 | 134669.8195 | 89296.38235 | 289082.5054 | 309715.8402 | 296112.0993 | HMDB02183 |
| clupanodonic acid/docosa-4,7,10,13,16-pentaenoic acid               | 61611.81465 | 71592.002   | 90141.63495 | 156094.2978 | 87888.2718  | 81898.66315 | 66868.14815 | 47238.84395 | 30427.3933  | 133093.4512 | 146168.0293 | 130460.8522 | HMDB06528 |
| UDP-D-glucose/UDP-D-galactose                                       | 276844.8673 | 254923.9811 | 186314.6978 | 563027.9524 | 972054.8096 | 1033353.375 | 1217896.356 | 1130710.434 | 2215780.691 | 721085.0625 | 734568.2377 | 907789.0592 | HMDB00286 |
| ADP-mannose/GDP-L-fucose/ADP alpha-D-glucoside                      | 14347.61525 | 16934.683   | 13576.2107  | 28207.2698  | 33698.40225 | 36341.6305  | 64969.6073  | 56409.29935 | 85875.885   | 38433.76375 | 36900.0996  | 34995.1377  | HMDB06369 |
| UDP-N-acetyl-alpha-D-glucosamine/UDP-N-acetyl-alpha-D-galactosamine | 651420.1697 | 538735.8696 | 419554.9943 | 3014576.234 | 5957082.616 | 6734291.741 | 7447838.324 | 7562955.906 | 11100381.25 | 3389219.143 | 3549323.494 | 3020371.758 | HMDB00290 |
| deoxycholate/chenodeoxycholate                                      | 77772.58635 | 84523.75525 | 53878.0048  | 43919.66995 | 68787.01315 | 64053.4091  | 76105.98735 | 80049.4166  | 75284.99675 | 81737.54595 | 71270.88175 | 74206.37705 | HMDB00626 |
| Taurodeoxycholic acid/taurochenodeoxycholate                        | 417046.0923 | 326505.9529 | 403001.2832 | 465699.2573 | 370180.9254 | 350510.7908 | 271967.5246 | 244122.3796 | 237810.809  | 284838.8085 | 286173.6194 | 396070.1849 | HMDB00896 |
| C27H46O4(3)                                                         | 23035.3272  | 26623.9027  | 32918.92445 | 9662.0996   | 12887.68815 | 10092.4559  | 8273.9271   | 21004.62595 | 16448.0257  | 26091.9004  | 16616.4199  | 20023.5678  |           |
| L-isoleucine/L-leucine                                              | 75227070.58 | 53056186.7  | 83125814.17 | 104084032   | 75138894.15 | 72414727.53 | 65511687.97 | 55460529.11 | 66219442.81 | 53127966.23 | 64053347.11 | 65634908.26 | HMDB00172 |
| thiosulfate(2-)                                                     | 97886.07075 | 129609.4903 | 87009.5934  | 116616.1181 | 146910.5537 | 132385.2591 | 105970.7693 | 124851.5365 | 76825.03635 | 102263.6957 | 109463.7357 | 113344.1029 | HMDB00257 |
| Diphosphate                                                         | 5364364.574 | 3650775.81  | 8240325.537 | 10796939.29 | 5738236.029 | 5550469.323 | 7260810.837 | 5214344.324 | 5638855.157 | 5024338.437 | 6199216.608 | 6175358.646 | HMDB00250 |
| glyoxylate                                                          | 399172.8619 | 313903.2931 | 351343.8349 | 400415.4534 | 339859.6554 | 313211.6156 | 358597.9125 | 330042.2834 | 394096.6178 | 307717.5767 | 306474.8684 | 315586.8658 | HMDB00119 |
| ethamp[c]                                                           | 5782683.376 | 5061124.85  | 5204921.565 | 1824502.202 | 1865408.179 | 1849763.224 | 1270849.406 | 1317165.915 | 603708.1225 | 7466384.273 | 8457046.371 | 6719202.147 | NA        |
| L-cysteate(1-)                                                      | 7218.2025   | 9726.4973   | 5359.4736   | 11619.01815 | 12019.43045 | 11077.5556  | 5190.2411   | 1560.5352   | 7256.85455  | 7478.13835  | 9538.8159   | 8335.94935  | HMDB02757 |
| Oxaloacetate                                                        | 12666.2755  | 15095.9829  | 12471.979   | 12831.36825 | 15648.567   | 12492.4319  | 18260.2221  | 16393.6802  | 13425.9088  | 21204.16635 | 20389.84735 | 16277.8579  | HMDB00223 |
| Picolinic acid/Nicotinate                                           | 142003.1442 | 135331.6777 | 151370.2214 | 170396.9827 | 140784.9042 | 129352.2243 | 143293.3077 | 131279.0062 | 154713.3848 | 129019.6141 | 127052.0944 | 129247.0506 | HMDB02243 |
| D-glucaric acid                                                     | 148685.161  | 115509.3564 | 112272.6323 | 80401.8831  | 84130.2175  | 69405.59885 | 54132.68535 | 46802.5766  | 85380.4991  | 51403.09405 | 48282.1169  | 55102.57465 | HMDB00663 |
| D-Glucuronate 1-phosphate                                           | 1000        | 1000        | 1000        | 1000        | 1000        | 2483.5466   | 83285.4329  | 101417.0656 | 160434.5259 | 1627.07735  | 2492.32535  | 1287.2463   | HMDB03976 |
| dCTP                                                                | 1000        | 1516.71285  | 1049.5861   | 4358.4684   | 11539.8361  | 17763.37845 | 22079.8763  | 28326.27985 | 34683.51505 | 9104.8703   | 11524.8384  | 17615.2338  | HMDB00998 |
| pyruvate                                                            | 2578785.778 | 2183473.189 | 1746934.993 | 1968811.984 | 2888470.422 | 2922614.037 | 4484049.136 | 4382198.225 | 4939935.585 | 2817339.954 | 2858760.541 | 2509406.527 | HMDB00243 |
| sarcosine                                                           | 91122.35385 | 84900.74325 | 78635.246   | 111039.504  | 111775.805  | 110795.5547 | 123790.5137 | 123311.4487 | 147488.081  | 104820.9576 | 96743.2751  | 120573.3724 | HMDB00271 |
| (R,s)-lactate                                                       | 89905872.98 | 60995572.37 | 87304028.96 | 150250622.4 | 112186694.5 | 111638243.4 | 268837097.2 | 231707804.8 | 358296195.1 | 71652143.78 | 78062152.74 | 78447534.12 | HMDB00190 |

|                            |             |             |             |             |             |             |             |             |             |             |             |             |           |
|----------------------------|-------------|-------------|-------------|-------------|-------------|-------------|-------------|-------------|-------------|-------------|-------------|-------------|-----------|
| acetoacetate               | 1335588.213 | 1037966.601 | 827427.2333 | 1228306.479 | 933099.9376 | 767882.7188 | 1115868.212 | 889959.5714 | 759966.5634 | 1011448.424 | 821063.8169 | 682682.2407 | HMDB00060 |
| L-glutamate(1-)            | 12160764.33 | 8724827.85  | 11122351.65 | 25795266.01 | 26093321.86 | 28890792.17 | 59408387.55 | 51254461.39 | 84464872.51 | 15927708.88 | 17265908.43 | 19176794.35 | HMDB00148 |
| alpha-D-glucose            | 16541934.41 | 12173094.35 | 18200401.2  | 19938604.49 | 12459683.03 | 11625381.56 | 10115605.83 | 7677605.029 | 8935231.052 | 11264089.17 | 13326584.34 | 13653230.62 | HMDB03345 |
| myo-inositol               | 8547579.527 | 6409698.432 | 7265332.805 | 9322863.3   | 8214198.188 | 8108382.686 | 4533724.421 | 4040035.374 | 6011305.404 | 12614362.04 | 12702103.97 | 10326763.16 | HMDB00211 |
| uridine                    | 665872.8707 | 404546.0092 | 595566.0958 | 766186.9547 | 761766.2876 | 755631.1098 | 780327.0677 | 590631.492  | 994688.7074 | 437102.4974 | 574028.8614 | 568686.1972 | HMDB00296 |
| uracil                     | 197941.476  | 220272.8178 | 243908.8095 | 276964.3884 | 275159.3497 | 271937.511  | 2222835.447 | 2278224.478 | 6507010.323 | 236768.1895 | 255936.1819 | 255461.0551 | HMDB00300 |
| Fumarate                   | 1652791.06  | 1379680.963 | 1309224.338 | 2494295.696 | 3446241.321 | 3517633.681 | 5658064.279 | 5488108.243 | 8176858.931 | 2162566.799 | 2161509.429 | 2700158.422 | HMDB00134 |
| L-aspartate(1-)            | 20476160.83 | 14889761.74 | 15791347.23 | 42105990.42 | 52143660.57 | 53923746.3  | 72336989.84 | 67947025.98 | 57263532.06 | 30178458.51 | 30791477.27 | 29688474.54 | HMDB00191 |
| L-ascorbate                | 3743411.259 | 1239967.463 | 1146039.953 | 264332.777  | 349884.2412 | 336196.6025 | 1198419.234 | 1145308.055 | 1478550.391 | 197691.2066 | 249035.8745 | 187386.4351 | HMDB00044 |
| glycine                    | 1255573.015 | 1020067.822 | 1124612.439 | 2342242.849 | 3935962.307 | 3860230.895 | 2800772.229 | 2746978.577 | 4346025.824 | 2277009.068 | 2251733.281 | 2235177.015 | HMDB00123 |
| succinate(2-)              | 8040022.418 | 3531080.678 | 9092964.164 | 13748345.72 | 7533494.436 | 6144632.247 | 12348078.76 | 6736877.93  | 13120127.56 | 3965068.79  | 5065316.554 | 5515306.149 | HMDB00254 |
| Dihydroxyacetone phosphate | 93133.0483  | 125836.6654 | 95557.2862  | 197346.4489 | 323006.8344 | 307874.087  | 785594.9911 | 912045.2106 | 2058800.454 | 140735.9686 | 128302.9788 | 247405.7781 | HMDB01473 |
| Phosphoenolpyruvate        | 155013.7819 | 157792.5758 | 184812.6563 | 203837.0407 | 135926.1297 | 91707.46125 | 45946.16    | 107828.5761 | 118873.5889 | 226636.7553 | 198162.4845 | 214624.4575 | HMDB00263 |
| Guanosine                  | 1854.12195  | 1497.6149   | 2438.6538   | 36567.5349  | 93915.8249  | 101066.4012 | 67610.78555 | 52990.38455 | 986536.1289 | 15508.07135 | 15265.6172  | 18090.5362  | HMDB00133 |

Supplemental Table 2. Metabolomics of CD4 T cell subsets for Supplemental Figure 4

| ID                                        | Naïve A      | Naïve B      | Naïve C      | Naïve D      | Naïve E      | Naïve F      | Th17 A       | Th17 B       | Th17 C       | Th17 D       | Th17 E       | Th17 F       | Treg A       | Treg B       | Treg C       | Treg D       | Treg E       | Treg F       | HMD B         |
|-------------------------------------------|--------------|--------------|--------------|--------------|--------------|--------------|--------------|--------------|--------------|--------------|--------------|--------------|--------------|--------------|--------------|--------------|--------------|--------------|---------------|
| 1,2-dipalmitoylglycerol                   | 0.42185<br>2 | 0.42185<br>2 | 0.42185<br>2 | 0.42185<br>2 | 0.42185<br>2 | 0.42185<br>2 | 1.00000<br>0 | 0.42185<br>2 | 1.93268<br>0 | 2.07258<br>7 | 1.33746<br>1 | 1.49112<br>6 | 0.42185<br>2 | 0.42185<br>2 | 0.85984<br>8 | 0.42185<br>2 | 0.42185<br>2 | 0.42185<br>2 | HMDB<br>07098 |
| 1-arachidonoylglycerophosphoethanolamine* | 1.50184<br>9 | 1.26032<br>8 | 1.64900<br>7 | 0.87399<br>4 | 1.33626<br>2 | 1.35297<br>7 | 0.74331<br>3 | 0.59932<br>3 | 0.42691<br>3 | 0.47258<br>5 | 0.97389<br>9 | 1.02610<br>1 | 1.73305<br>2 | 1.43989<br>5 | 1.72613<br>2 | 3.05887<br>9 | 2.44325<br>2 | 2.22480<br>5 | HMDB<br>11517 |
| 1-arachidonoylglycerophosphoinositol*     | 0.93448<br>8 | 0.69782<br>2 | 0.43637<br>0 | 0.79967<br>4 | 0.36448<br>0 | 1.00000<br>0 | 1.18668<br>8 | 1.24477<br>1 | 0.36448<br>0 | 0.63403<br>0 | 1.24977<br>1 | 1.19963<br>9 | 2.71769<br>5 | 3.03398<br>2 | 0.36448<br>0 | 0.46978<br>7 | 1.16535<br>5 | 0.36448<br>0 |               |
| 1-myristoylglycerophosphocholine          | 0.18958<br>7 | 1.17190<br>2 | 1.03559<br>0 | 1.31687<br>9 | 1.13214<br>1 | 0.18958<br>7 | 0.18958<br>7 | 0.18958<br>7 | 0.18958<br>7 | 1.55862<br>4 | 1.68595<br>9 | HMDB<br>10379 |
| 1-oleoylglycerol (1-monolein)             | 0.45787<br>0 | 1.05100<br>3 | 0.45787<br>0 | 0.74788<br>9 | 0.45787<br>0 | 0.45787<br>0 | 0.94899<br>7 | 0.45787<br>0 | 1.10830<br>7 | 1.29696<br>3 | 1.24609<br>3 | 0.91145<br>5 | 0.76677<br>4 | 0.89133<br>6 | 0.45787<br>0 | 0.45787<br>0 | 1.69631<br>3 | 0.45787<br>0 | HMDB<br>11567 |
| 1-oleoylglycerophosphocholine             | 0.06853<br>0 | 0.06853<br>0 | 0.06853<br>0 | 0.06853<br>0 | 0.06853<br>0 | 0.06853<br>0 | 0.08134<br>7 | 0.12673<br>4 | 1.06984<br>6 | 1.00108<br>0 | 1.53129<br>0 | 1.24563<br>8 | 0.06853<br>0 | 0.06853<br>0 | 0.06853<br>0 | 0.06853<br>0 | 0.99892<br>1 | 1.23864<br>7 |               |
| 1-oleoylglycerophosphoethanolamine        | 1.49588<br>7 | 0.90384<br>2 | 0.85657<br>0 | 0.35141<br>3 | 0.35141<br>3 | 0.71818<br>0 | 1.31030<br>1 | 0.80544<br>7 | 0.35141<br>3 | 1.00000<br>0 | 1.70516<br>3 | 0.82450<br>0 | 1.46693<br>1 | 1.03917<br>9 | 0.35141<br>3 | 0.66150<br>4 | 1.16228<br>9 | 1.47002<br>7 | HMDB<br>11506 |
| 1-oleoylglycerophosphoinositol*           | 0.29942<br>4 | 0.29942<br>4 | 0.29942<br>4 | 0.29942<br>4 | 0.29942<br>4 | 0.29942<br>4 | 1.58253<br>9 | 0.99211<br>2 | 1.62521<br>1 | 2.36709<br>9 | 1.98676<br>5 | 1.54572<br>4 | 0.29942<br>4 | 0.29942<br>4 | 0.29942<br>4 | 0.53038<br>3 | 0.29942<br>4 | 0.29942<br>4 |               |
| 1-palmitoleoylglycerophosphocholine*      | 0.52661<br>1 | 1.27022<br>9 | 0.75220<br>6 | 1.23163<br>4 | 1.43904<br>0 | 0.52661<br>1 | 0.52661<br>1 | 0.52661<br>1 | 0.52661<br>1 | 0.52661<br>1 | 0.52661<br>1 |               |
| 1-palmitoylglycerol (1-monopalmitin)      | 1.18504<br>2 | 0.84159<br>4 | 1.22516<br>0 | 0.65133<br>3 | 0.99134<br>5 | 1.32148<br>9 | 0.79287<br>9 | 0.43028<br>0 | 0.67427<br>1 | 1.02716<br>8 | 1.25817<br>7 | 0.66289<br>5 | 0.91182<br>0 | 0.90703<br>3 | 1.10828<br>8 | 1.34980<br>7 | 2.40151<br>3 | 1.40643<br>3 |               |
| 1-palmitoylglycerophosphocholine          | 0.48798<br>8 | 0.52520<br>0 | 1.00000<br>0 | 0.67921<br>9 | 0.93516<br>7 | 0.77246<br>3 | 0.50713<br>2 | 0.59549<br>3 | 6.38104<br>1 | 6.07198<br>2 | 8.64129<br>9 | 7.66921<br>4 | 0.61957<br>1 | 0.32224<br>4 | 0.28700<br>0 | 0.58508<br>7 | 9.22483<br>8 | #####<br>##  |               |
| 1-palmitoylglycerophosphoethanolamine     | 0.20296<br>3 | 0.20296<br>3 | 0.71500<br>8 | 0.84290<br>6 | 0.20296<br>3 | 1.36028<br>1 | 1.13335<br>8 | 1.01750<br>5 | 0.60816<br>4 | 1.31462<br>4 | 0.94991<br>2 | 0.53924<br>9 | 2.01006<br>1 | 1.75348<br>0 | 0.20296<br>3 | 1.05658<br>8 | 0.99114<br>6 | 1.55671<br>2 | HMDB<br>11503 |
| 1-palmitoylglycerophosphoinositol*        | 0.45009<br>6 | 0.45009<br>6 | 0.45009<br>6 | 0.45009<br>6 | 0.45009<br>6 | 0.45009<br>6 | 1.81282<br>2 | 1.30821<br>2 | 1.78474<br>7 | 2.53010<br>8 | 2.13004<br>8 | 1.34721<br>1 | 0.83882<br>7 | 0.56144<br>6 | 0.45009<br>6 | 1.17567<br>3 | 0.45009<br>6 | 0.45009<br>6 |               |
| 1-palmitoylplasmylethanolamine*           | 0.20449<br>1 | 0.20449<br>1 | 0.20449<br>1 | 0.20449<br>1 | 0.20449<br>1 | 0.20449<br>1 | 1.96474<br>4 | 0.87146<br>1 | 0.68084<br>8 | 2.08435<br>6 | 2.64310<br>8 | 2.09614<br>6 | 1.67191<br>9 | 1.84462<br>5 | 0.32678<br>1 | 0.30345<br>6 | 1.00000<br>0 | 1.34095<br>3 |               |
| 1-stearoylglycerol (1-monostearin)        | 1.02624<br>1 | 1.15571<br>1 | 1.30335<br>4 | 0.60092<br>8 | 1.14919<br>7 | 1.06122<br>1 | 0.96120<br>9 | 0.50921<br>0 | 0.86285<br>5 | 0.87343<br>6 | 1.28970<br>6 | 1.02842<br>1 | 1.36337<br>7 | 0.93461<br>8 | 1.15679<br>0 | 0.87831<br>2 | 2.19590<br>5 | 1.75690<br>8 |               |
| 1-stearoylglycerophosphocholine           | 0.10643<br>0 | 0.10643<br>0 | 0.10643<br>0 | 0.26099<br>7 | 0.10643<br>0 | 0.10643<br>0 | 0.10643<br>0 | 0.23030<br>7 | 1.66282<br>5 | 1.45783<br>4 | 2.32355<br>4 | 2.32006<br>3 | 0.20165<br>7 | 0.11992<br>3 | 0.20946<br>6 | 0.10643<br>0 | 4.32155<br>8 | 5.98187<br>0 |               |
| 1-stearoylglycerophosphoethanolamine      | 0.22604<br>0 | 1.12811<br>6 | 0.97304<br>9 | 0.88557<br>2 | 0.88401<br>8 | 0.22604<br>0 | 0.22604<br>0 | 0.22604<br>0 | 0.22604<br>0 | 2.54418<br>4 | 3.30765<br>3 | HMDB<br>11130 |
| 1-stearoylglycerophosphoinositol          | 0.32792<br>6 | 0.37374<br>1 | 0.28551<br>3 | 0.21393<br>5 | 0.20433<br>5 | 0.20433<br>5 | 1.76415<br>5 | 1.41253<br>6 | 1.87199<br>1 | 2.35310<br>1 | 2.78617<br>5 | 1.84568<br>6 | 0.51444<br>0 | 0.67024<br>3 | 0.30087<br>6 | 0.59106<br>4 | 0.82402<br>2 | 0.90650<br>4 |               |
| 10-heptadecenoate (17:1n7)                | 0.65511<br>8 | 0.42611<br>7 | 0.69723<br>5 | 0.28662<br>7 | 0.64271<br>9 | 0.28662<br>7 | 0.87323<br>4 | 0.67038<br>5 | 0.66387<br>7 | 0.69215<br>7 | 0.96040<br>8 | 1.16230<br>9 | 1.00427<br>2 | 1.00653<br>1 | 0.81776<br>4 | 1.01765<br>4 | 1.01348<br>4 | 1.25786<br>0 |               |
| 10-nonadecenoate (19:1n9)                 | 0.33151<br>4 | 0.33151<br>4 | 0.83200<br>0 | 0.33208<br>1 | 0.33151<br>4 | 0.44453<br>9 | 0.91736<br>2 | 0.85167<br>6 | 0.95393<br>3 | 0.85326<br>1 | 1.43634<br>7 | 1.43899<br>6 | 0.72252<br>7 | 0.91858<br>7 | 0.48668<br>2 | 0.69541<br>5 | 0.62046<br>6 | 0.95561<br>2 |               |
| 13-methylmyristic acid                    | 1.53004<br>8 | 1.93786<br>0 | 1.80417<br>4 | 1.40570<br>6 | 2.19175<br>6 | 2.07101<br>2 | 0.59206<br>0 | 0.58216<br>3 | 0.67191<br>4 | 0.62434<br>7 | 1.01049<br>7 | 1.37911<br>9 | 0.98950<br>3 | 0.98409<br>9 | 1.93011<br>3 | 1.62399<br>6 | 1.96130<br>2 | 1.88151<br>5 |               |
| 2'-deoxycytidine                          | 0.45509<br>5 | 0.45509<br>5 | 0.62807<br>2 | 0.45509<br>5 | 0.45509<br>5 | 0.45509<br>5 | 1.08411<br>0 | 0.76181<br>3 | 0.76911<br>0 | 1.11773<br>4 | 1.87198<br>4 | 1.32478<br>8 | 1.43776<br>8 | 2.11448<br>0 | 1.39585<br>7 | 1.80492<br>7 | 1.73607<br>3 | 1.83157<br>6 | HMDB<br>00014 |
| 2'-deoxyinosine                           | 0.44357<br>4 | 0.44357<br>4 | 0.44357<br>4 | 0.44357<br>4 | 0.44357<br>4 | 0.44357<br>4 | 3.29934<br>8 | 2.90472<br>5 | 0.70165<br>3 | 0.90309<br>6 | 1.16356<br>3 | 0.44357<br>4 | 2.47753<br>0 | 2.34916<br>2 | 0.44357<br>4 | 0.44357<br>4 | 0.44357<br>4 | 0.44357<br>4 | HMDB<br>00071 |
| 2-arachidonoylglycerophosphocholine*      | 0.15003<br>0 | 0.15003<br>0 | 0.15003<br>0 | 0.15003<br>0 | 0.37397<br>5 | 0.15003<br>0 | 0.15003<br>0 | 0.29224<br>0 | 1.82439<br>6 | 1.09572<br>0 | 2.65647<br>6 | 3.47389<br>8 | 0.15003<br>0 | 0.15003<br>0 | 0.15003<br>0 | 0.15003<br>0 | 7.56454<br>3 | 8.75881<br>2 |               |
| 2-arachidonoylglycerophosphoethanolamine* | 0.64230<br>8 | 1.01076<br>2 | 0.79818<br>6 | 0.81672<br>6 | 0.40654<br>6 | 0.53518<br>1 | 0.13874<br>0 | 0.24241<br>2 | 6.09633<br>9 | 3.82114<br>7 | 9.14556<br>3 | #####<br>##  | 0.22665<br>8 | 0.13375<br>5 | 0.38428<br>2 | 0.29191<br>9 | #####<br>##  | #####<br>##  |               |

|                                               |              |              |              |              |              |              |              |              |              |              |              |              |              |              |              |              |              |              |               |  |
|-----------------------------------------------|--------------|--------------|--------------|--------------|--------------|--------------|--------------|--------------|--------------|--------------|--------------|--------------|--------------|--------------|--------------|--------------|--------------|--------------|---------------|--|
| 2-docosaenoylglycerophosphocholine*           | 0.14477<br>5 | 1.10774<br>5 | 0.78717<br>2 | 1.34687<br>0 | 1.40729<br>2 | 0.14477<br>5 | 0.45504<br>5 | 0.14477<br>5 | 0.14477<br>5 | 3.15115<br>6 | 3.66195<br>1  |  |
| 2-docosaenoylglycerophosphoethanolamine*      | 0.45225<br>0 | 0.60824<br>6 | 0.33538<br>6 | 0.42259<br>0 | 0.27378<br>0 | 0.26341<br>7 | 0.07424<br>4 | 0.12277<br>7 | 3.51259<br>1 | 2.49449<br>7 | 4.33116<br>2 | 5.92300<br>4 | 0.05935<br>7 | 0.05935<br>7 | 0.05935<br>7 | 0.12938<br>8 | 4.89655<br>3 | 5.72720<br>2 |               |  |
| 2-docosapentaenoylglycerophosphoethanolamine* | 0.29199<br>7 | 0.36687<br>5 | 0.24867<br>0 | 0.14807<br>7 | 0.04954<br>0 | 0.04954<br>0 | 0.04954<br>0 | 0.07769<br>1 | 2.73518<br>3 | 1.66309<br>8 | 3.18559<br>2 | 4.42042<br>5 | 0.15488<br>0 | 0.04954<br>0 | 0.04954<br>0 | 0.26015<br>0 | 4.69586<br>3 | 4.14118<br>3 |               |  |
| 2-hydroxyglutarate                            | 1.10650<br>0 | 0.28968<br>1 | 0.42894<br>3 | 0.49406<br>9 | 0.48445<br>5 | 0.64933<br>7 | 1.55984<br>7 | 0.78265<br>9 | 1.98090<br>9 | 2.15385<br>4 | 1.70790<br>0 | 0.75587<br>8 | 0.64603<br>9 | 0.50847<br>9 | 0.99051<br>4 | 0.44446<br>8 | 0.28968<br>1 | 0.28968<br>1 | HMDB<br>00606 |  |
| 2-hydroxypalmitate                            | 1.00380<br>9 | 0.96177<br>3 | 1.43801<br>1 | 0.58998<br>6 | 1.25865<br>0 | 1.35348<br>0 | 1.13376<br>5 | 0.87147<br>6 | 0.78493<br>6 | 0.49317<br>4 | 1.74668<br>7 | 2.79919<br>6 | 0.98372<br>3 | 1.08938<br>6 | 1.24276<br>3 | 1.17294<br>5 | 1.94313<br>5 | 2.16589<br>0 |               |  |
| 2-myristoylglycerophosphocholine*             | 0.23772<br>1 | 0.24488<br>4 | 2.42488<br>0 | 1.68702<br>8 | 2.58183<br>0 | 2.79316<br>2 | 0.23772<br>1 | 0.23772<br>1 | 0.96566<br>5 | 0.23772<br>1 | 1.16473<br>8 | 1.07047<br>5 |               |  |
| 2-oleoylglycerophosphocholine*                | 0.07842<br>4 | 0.07842<br>4 | 0.07842<br>4 | 0.07842<br>4 | 0.07842<br>4 | 0.07842<br>4 | 0.08209<br>7 | 0.23820<br>7 | 1.63930<br>8 | 1.15570<br>8 | 2.08090<br>1 | 1.92855<br>2 | 0.07842<br>4 | 0.07842<br>4 | 0.07842<br>4 | 0.07842<br>4 | 0.80745<br>6 | 0.87690<br>8 |               |  |
| 2-oleoylglycerophosphoethanolamine*           | 0.05497<br>9 | 0.05497<br>9 | 0.05497<br>9 | 0.11679<br>0 | 0.05497<br>9 | 0.31393<br>0 | 0.05497<br>9 | 0.09552<br>5 | 1.81255<br>9 | 1.40552<br>8 | 2.69283<br>2 | 3.09183<br>9 | 0.05497<br>9 | 0.05497<br>9 | 0.05497<br>9 | 0.05497<br>9 | 0.67770<br>7 | 0.72689<br>4 |               |  |
| 2-palmitoleoylglycerophosphocholine*          | 0.24595<br>5 | 0.24595<br>5 | 0.24595<br>5 | 0.24595<br>5 | 0.24595<br>5 | 0.24595<br>5 | 0.30322<br>3 | 0.51127<br>7 | 2.63772<br>7 | 1.69021<br>1 | 2.49991<br>8 | 2.33855<br>8 | 0.24595<br>5 | 0.24595<br>5 | 0.24595<br>5 | 0.24595<br>5 | 0.24595<br>5 | 1.00000<br>0 |               |  |
| 2-palmitoleoylglycerophosphoethanolamine*     | 0.19660<br>5 | 1.76270<br>9 | 1.18826<br>7 | 1.60195<br>2 | 2.00979<br>6 | 0.19660<br>5 | 0.19660<br>5 | 1.00000<br>0 | 0.19660<br>5 | 0.57815<br>7 | 0.79296<br>1 |               |  |
| 2-palmitoylglycerophosphocholine*             | 0.08966<br>3 | 0.08966<br>3 | 0.08966<br>3 | 0.08966<br>3 | 0.08966<br>3 | 0.08966<br>3 | 0.14411<br>2 | 0.16721<br>0 | 2.01070<br>9 | 1.40285<br>9 | 2.68890<br>4 | 2.65265<br>0 | 0.08966<br>3 | 0.08966<br>3 | 0.08966<br>3 | 0.35589<br>5 | 2.51306<br>4 | 2.68740<br>4 |               |  |
| 2-palmitoylglycerophosphoethanolamine*        | 0.60543<br>1 | 0.60543<br>1 | 0.60543<br>1 | 0.60543<br>1 | 0.60543<br>1 | 0.60543<br>1 | 0.76266<br>2 | 0.83456<br>6 | 1.00000<br>0 | 0.97334<br>1 | 0.60543<br>1 | 0.60543<br>1 | 0.60543<br>1 | 1.36946<br>3 | 0.60543<br>1 | 2.55174<br>4 | 3.21654<br>9 | 2.34078<br>6 |               |  |
| 2-stearoylglycerophosphoinositol*             | 0.58114<br>9 | 0.58114<br>9 | 0.58114<br>9 | 0.58114<br>9 | 0.58114<br>9 | 0.58114<br>9 | 1.34793<br>2 | 0.87421<br>0 | 1.20384<br>4 | 1.36008<br>7 | 1.68830<br>1 | 1.45118<br>8 | 0.58114<br>9 | 0.58114<br>9 | 0.58114<br>9 | 0.58114<br>9 | 0.58114<br>9 | 0.58114<br>9 |               |  |
| 3'-dephosphocoenzyme A                        | 0.27924<br>3 | 0.32042<br>8 | 0.74392<br>3 | 0.94288<br>4 | 1.50519<br>7 | 1.02724<br>1 | 0.57369<br>7 | 1.05013<br>9 | 0.27924<br>3 | 0.27924<br>3 | 0.27924<br>3 | 0.27924<br>3 | HMDB<br>01373 |  |
| 3-(4-hydroxyphenyl)lactate                    | 0.35204<br>3 | 0.35204<br>3 | 0.35204<br>3 | 0.35204<br>3 | 0.35204<br>3 | 0.35204<br>3 | 0.40077<br>2 | 0.35204<br>3 | 0.91383<br>5 | 0.91168<br>5 | 1.10550<br>8 | 1.38679<br>8 | 0.35204<br>3 | 0.35204<br>3 | 0.35204<br>3 | 0.35204<br>3 | 0.35204<br>3 | 0.35204<br>3 | HMDB<br>00755 |  |
| 3-dehydrocarnitine*                           | #####<br>### | #####<br>### | #####<br>### | 8.70845<br>6 | #####<br>### | #####<br>### | 0.68930<br>4 | 0.95766<br>1 | 1.04233<br>9 | 0.53785<br>2 | 0.87644<br>9 | 1.17453<br>2 | 0.70529<br>3 | 1.08595<br>8 | 1.23174<br>6 | 1.96776<br>2 | 1.66354<br>8 | 1.13916<br>6 | HMDB<br>12154 |  |
| 3-phosphoglycerate                            | 3.68827<br>2 | 1.91479<br>1 | 3.44687<br>6 | 1.68809<br>9 | 2.26974<br>2 | 3.86524<br>6 | 0.50174<br>5 | 0.39010<br>4 | 1.52652<br>0 | 0.99544<br>5 | 2.19682<br>7 | 1.78627<br>1 | 0.65547<br>5 | 0.85462<br>3 | 1.27286<br>7 | 0.72582<br>8 | 0.75845<br>9 | 0.79421<br>6 | HMDB<br>00807 |  |
| 4-guanidinobutanoate                          | 0.81887<br>7 | 0.57129<br>0 | 1.12368<br>8 | 0.91306<br>9 | 1.44933<br>9 | 0.59874<br>4 | 1.26941<br>6 | 0.87967<br>6 | 0.90810<br>0 | 0.90694<br>6 | 2.37713<br>6 | 2.65511<br>9 | 1.00000<br>0 | 1.13681<br>2 | 3.42463<br>0 | 2.10601<br>2 | 5.98658<br>9 | 5.67318<br>5 | HMDB<br>03464 |  |
| 5-hydroxymethylfurfural                       | 0.51114<br>7 | 0.74664<br>3 | 0.88735<br>9 | 0.51114<br>7 | 0.51114<br>7 | 1.16872<br>1 | 1.75531<br>7 | 2.83174<br>2 | 0.51114<br>7 | 0.51114<br>7 | 0.51114<br>7 |               |  |
| 5-methylcytosine                              | 0.37748<br>5 | 0.41622<br>4 | 0.37748<br>5 | 0.37748<br>5 | 0.37748<br>5 | 0.37748<br>5 | #####<br>##  | 0.37748<br>5 | 0.37748<br>5 | 0.37748<br>5 | 0.37748<br>5 | 0.37748<br>5 | HMDB<br>02894 |  |
| 5-methylthioadenosine (MTA)                   | 2.36322<br>8 | 2.26078<br>0 | 1.70197<br>1 | 1.51446<br>8 | 2.42237<br>0 | 2.12371<br>4 | 1.62324<br>0 | 1.67211<br>3 | 1.04868<br>6 | 0.91012<br>7 | 1.03978<br>2 | 1.35246<br>3 | 1.38435<br>3 | 1.44073<br>7 | 2.35034<br>7 | 1.88433<br>9 | 0.89877<br>3 | 0.80268<br>6 | HMDB<br>01173 |  |
| 5-oxoproline                                  | 1.04913<br>4 | 1.08656<br>8 | 0.99688<br>1 | 0.66548<br>4 | 1.28015<br>1 | 1.11475<br>1 | 0.26427<br>5 | 0.23493<br>0 | 0.55743<br>4 | 0.69491<br>2 | 1.17470<br>0 | 1.35840<br>1 | 0.29577<br>1 | 0.43412<br>9 | 2.48266<br>9 | 1.07620<br>2 | 1.56527<br>2 | 1.47227<br>8 | HMDB<br>00267 |  |
| 5-phosphoribosyl diphosphate (PRPP)           | 0.89342<br>5 | 1.03951<br>6 | 0.96048<br>3 | 0.70403<br>6 | 1.40130<br>2 | 1.46867<br>1 | 0.70403<br>6 | HMDB<br>00280 |  |
| 6'-sialyllactose                              | 0.33031<br>1 | 1.07306<br>3 | 0.33031<br>1 | 0.33031<br>1 | 0.75346<br>2 | 0.33031<br>1 | 1.00000<br>0 | 0.80813<br>4 | 0.80902<br>9 | 0.65106<br>7 | 1.05891<br>9 | 0.96170<br>6 | 1.01526<br>3 | 0.50594<br>6 | 1.17435<br>5 | 0.33031<br>1 | 0.98809<br>5 | 1.01816<br>0 | HMDB<br>06562 |  |
| 7-alpha-hydroxycholesterol                    | 0.87236<br>0 | 0.33469<br>5 | 0.33469<br>5 | 0.33469<br>5 | 0.33469<br>5 | 0.33469<br>5 | 1.59235<br>8 | 0.38433<br>4 | 1.00000<br>0 | 0.82034<br>2 | 1.63829<br>8 | 1.63241<br>2 | 1.12060<br>5 | 1.08750<br>4 | 0.33469<br>5 | 1.29825<br>5 | 2.42360<br>6 | 0.98789<br>4 | HMDB<br>01496 |  |



|                                    |              |              |              |              |              |              |              |              |              |              |              |              |              |              |              |              |              |              |               |
|------------------------------------|--------------|--------------|--------------|--------------|--------------|--------------|--------------|--------------|--------------|--------------|--------------|--------------|--------------|--------------|--------------|--------------|--------------|--------------|---------------|
| caprylate (8:0)                    | 2.26598<br>4 | 2.45979<br>9 | 0.27046<br>0 | 1.54902<br>6 | 0.27046<br>0 | 2.68562<br>4 | 0.37726<br>2 | 0.45617<br>3 | 0.47329<br>9 | 0.41728<br>6 | 1.30780<br>5 | 1.44089<br>2 | 1.00440<br>4 | 1.46749<br>7 | 0.27046<br>0 | 2.47483<br>0 | 0.27046<br>0 | 1.79777<br>2 | HMDB<br>00482 |
| carnitine                          | #####<br>##  | #####<br>##  | #####<br>##  | 9.85514<br>1 | #####<br>##  | #####<br>##  | 1.47609<br>0 | 1.23052<br>2 | 0.89251<br>5 | 0.74742<br>5 | 1.47059<br>8 | 1.55504<br>8 | 1.48030<br>9 | 1.31935<br>1 | 1.29590<br>2 | 0.93205<br>1 | 0.94348<br>6 | 1.08487<br>1 |               |
| cholesterol                        | 0.98230<br>2 | 1.19864<br>0 | 0.82700<br>2 | 0.65018<br>2 | 1.07190<br>2 | 0.99047<br>5 | 0.86740<br>9 | 0.56739<br>6 | 0.53534<br>6 | 0.66004<br>2 | 0.99960<br>9 | 1.02244<br>6 | 1.34206<br>8 | 1.16683<br>4 | 1.24762<br>3 | 1.58327<br>5 | 2.36107<br>3 | 2.24733<br>9 | HMDB<br>00067 |
| choline                            | 2.33502<br>2 | 2.09242<br>3 | 2.12888<br>9 | 1.32749<br>0 | 2.68658<br>2 | 2.78477<br>5 | 0.94227<br>7 | 0.83141<br>1 | 0.56000<br>5 | 0.52527<br>7 | 0.98221<br>0 | 1.18794<br>5 | 1.33553<br>6 | 1.46117<br>0 | 1.80103<br>2 | 1.48397<br>0 | 1.96546<br>4 | 2.28762<br>3 |               |
| choline phosphate                  | 3.67181<br>8 | 3.77000<br>9 | 3.74431<br>5 | 2.55624<br>4 | 5.29892<br>2 | 4.37149<br>7 | 1.63720<br>4 | 1.51510<br>5 | 0.58487<br>2 | 0.52360<br>6 | 0.86644<br>6 | 0.93563<br>0 | 1.48728<br>4 | 1.61431<br>9 | 1.52282<br>3 | 1.06437<br>0 | 0.64093<br>8 | 0.67872<br>1 |               |
| cis-aconitate                      | 2.06003<br>2 | 3.61675<br>0 | 2.03449<br>9 | 2.00729<br>0 | 3.83389<br>1 | 2.66975<br>2 | 0.51519<br>5 | 0.50670<br>6 | 0.72274<br>7 | 0.76408<br>5 | 1.09695<br>0 | 0.93931<br>7 | 0.81738<br>4 | 1.07756<br>4 | 2.55720<br>1 | 1.65301<br>5 | 0.84337<br>2 | 0.89035<br>5 | HMDB<br>00072 |
| cis-vaccenate (18:1n7)             | 0.78632<br>7 | 0.94175<br>0 | 0.33665<br>6 | 0.84786<br>3 | 0.62499<br>6 | 1.06316<br>9 | 0.73812<br>8 | 0.53418<br>3 | 1.08707<br>9 | 1.37398<br>4 | 1.81721<br>7 | 1.50603<br>5 | 0.40041<br>9 | 0.42707<br>7 | 0.65393<br>4 | 0.91269<br>2 | 1.59758<br>3 | 1.23730<br>3 |               |
| citrate                            | 2.13154<br>0 | 3.00245<br>7 | 2.07390<br>9 | 1.72913<br>5 | 3.64784<br>7 | 2.08017<br>2 | 0.63476<br>2 | 0.52466<br>1 | 1.08464<br>7 | 1.20429<br>6 | 1.15480<br>6 | 1.14511<br>4 | 0.63779<br>9 | 0.87577<br>4 | 2.23741<br>1 | 1.26007<br>0 | 1.02882<br>6 | 0.93657<br>7 | HMDB<br>00094 |
| coenzyme A                         | 2.05075<br>5 | 1.55006<br>9 | 2.25171<br>5 | 1.60349<br>5 | 2.39337<br>1 | 2.69478<br>9 | 1.73159<br>4 | 1.28201<br>0 | 1.10404<br>2 | 0.92207<br>0 | 1.05101<br>9 | 1.51339<br>6 | 0.65113<br>7 | 1.55048<br>5 | 0.77886<br>2 | 0.68489<br>4 | 0.36307<br>8 | 0.36909<br>3 | HMDB<br>01423 |
| creatine                           | 1.24038<br>7 | 1.29958<br>3 | 1.42275<br>6 | 0.87433<br>8 | 1.65105<br>2 | 1.55841<br>7 | 0.83934<br>6 | 0.80189<br>4 | 0.69886<br>8 | 0.70658<br>8 | 1.32709<br>1 | 1.40345<br>9 | 0.95193<br>6 | 1.06120<br>6 | 1.74953<br>9 | 1.10991<br>5 | 1.18639<br>7 | 1.34594<br>2 | HMDB<br>00064 |
| cysteine                           | 1.09770<br>2 | 0.85080<br>1 | 0.89378<br>4 | 0.81326<br>2 | 1.16707<br>9 | 1.64155<br>3 | 2.17639<br>7 | 0.31211<br>9 | 0.42973<br>6 | 0.34874<br>2 | 1.51992<br>4 | 0.97642<br>8 | 0.93654<br>7 | 1.71551<br>4 | 0.82651<br>3 | 0.45143<br>4 | 0.82850<br>3 | 0.85846<br>2 | HMDB<br>00574 |
| cysteine-glutathione disulfide     | 1.00000<br>0 | 2.15909<br>6 | 1.18356<br>2 | 0.66346<br>2 | 1.96133<br>6 | 1.36391<br>2 | 0.41514<br>2 | 0.44063<br>1 | 0.17993<br>5 | 0.17993<br>5 | 0.80474<br>1 | 0.93817<br>1 | 0.98505<br>5 | 0.99844<br>5 | 2.66180<br>4 | 2.18047<br>6 | 2.94181<br>2 | 3.22980<br>5 | HMDB<br>00656 |
| cytidine                           | 0.77814<br>8 | 0.69411<br>5 | 0.88312<br>0 | 0.58476<br>4 | 1.01404<br>9 | 0.87580<br>9 | 1.57020<br>2 | 1.28512<br>0 | 1.42930<br>7 | 1.24764<br>6 | 1.49862<br>1 | 1.85696<br>0 | 0.98595<br>1 | 1.22402<br>7 | 1.76733<br>2 | 1.45146<br>0 | 1.10743<br>0 | 1.29542<br>3 | HMDB<br>00089 |
| cytidine 5'-diphosphocholine       | 1.75015<br>2 | 1.00000<br>0 | 2.15588<br>5 | 1.08462<br>1 | 1.37546<br>6 | 2.34761<br>9 | 2.07715<br>4 | 2.06943<br>1 | 0.50551<br>2 | 0.26124<br>5 | 0.80704<br>5 | 0.72108<br>3 | 2.04222<br>0 | 2.15451<br>2 | 0.17794<br>4 | 0.17794<br>4 | 0.24425<br>9 | 0.30015<br>6 |               |
| cytidine 5'-monophosphate (5'-CMP) | 5.27691<br>7 | 4.79609<br>1 | 5.53179<br>5 | 3.50349<br>3 | 6.93642<br>6 | 5.89090<br>5 | 0.68467<br>1 | 0.61223<br>0 | 0.62788<br>3 | 0.53325<br>8 | 0.71854<br>2 | 0.88957<br>6 | 0.61476<br>4 | 0.70880<br>3 | 1.02878<br>3 | 0.70837<br>1 | 0.74450<br>5 | 0.97121<br>7 | HMDB<br>00095 |
| cytidine-5'-diphosphoethanolamine  | 1.93203<br>5 | 2.19221<br>5 | 2.47865<br>5 | 1.73534<br>9 | 2.96007<br>4 | 2.53052<br>1 | 0.68872<br>0 | 0.60352<br>0 | 0.57727<br>2 | 0.89650<br>5 | 1.13603<br>5 | 1.01741<br>1 | 1.04345<br>9 | 1.36893<br>2 | 1.45807<br>0 | 1.28268<br>5 | 1.05970<br>5 | 1.01040<br>5 | HMDB<br>01564 |
| cytosine                           | 0.09863<br>5 | 0.09863<br>5 | 0.09863<br>5 | 0.09863<br>5 | 2.40734<br>4 | 0.09863<br>5 | 5.30754<br>5 | 1.19048<br>9 | 0.15206<br>6 | 0.09863<br>5 | 0.09863<br>5 | 0.09863<br>5 | #####<br>##  | 0.09863<br>5 | 0.09863<br>5 | 0.45736<br>5 | 0.09863<br>5 | 0.09863<br>5 | HMDB<br>00630 |
| deoxycarnitine                     | 2.34035<br>2 | 2.20493<br>3 | 3.03296<br>9 | 1.82860<br>2 | 3.65504<br>7 | 3.14857<br>4 | 0.73585<br>3 | 0.55957<br>6 | 0.59070<br>2 | 0.51753<br>0 | 1.14182<br>2 | 1.51173<br>5 | 0.85559<br>9 | 0.95361<br>9 | 1.97407<br>0 | 1.15716<br>3 | 1.88621<br>6 | 1.47969<br>2 | HMDB<br>01161 |
| desmosterol                        | 0.43111<br>8 | HMDB<br>02719 |
| dihomo-linoleate (20:2n6)          | 1.36331<br>0 | 1.63667<br>7 | 1.31160<br>3 | 1.03805<br>0 | 0.83628<br>8 | 1.28471<br>2 | 0.97054<br>1 | 0.76324<br>9 | 0.85352<br>0 | 0.76377<br>6 | 0.99000<br>8 | 1.00999<br>2 | 0.82151<br>9 | 0.90039<br>4 | 0.36775<br>5 | 0.73429<br>6 | 0.78647<br>3 | 0.88302<br>4 |               |
| dihomo-linolenate (20:3n3 or n6)   | 0.85847<br>0 | 0.98440<br>6 | 0.78011<br>5 | 0.66890<br>5 | 0.69288<br>9 | 0.88018<br>2 | 1.01559<br>4 | 0.94212<br>7 | 0.67378<br>6 | 0.73404<br>9 | 0.83051<br>7 | 1.07753<br>0 | 1.74651<br>9 | 1.63689<br>0 | 0.37555<br>9 | 0.93684<br>1 | 1.35339<br>9 | 1.49312<br>1 | HMDB<br>02925 |
| dihydrocholesterol                 | 0.85230<br>4 | 0.94277<br>2 | 0.48959<br>2 | 0.32378<br>0 | 0.42605<br>6 | 0.85008<br>5 | 0.32378<br>0 | 0.73359<br>5 | 0.42443<br>3 | 0.40383<br>3 | 1.03112<br>6 | 1.25368<br>6 | 1.20566<br>4 | 1.12512<br>0 | 0.96887<br>4 | 1.54949<br>8 | 2.77275<br>6 | 2.54568<br>3 | HMDB<br>00908 |
| dihydroxyacetone phosphate (DHAP)  | 0.32132<br>0 | 0.32132<br>0 | 0.32132<br>0 | 0.32132<br>0 | 0.32132<br>0 | 0.32132<br>0 | 1.89125<br>6 | 1.00072<br>3 | 4.09125<br>6 | 3.93558<br>1 | 3.48088<br>7 | 3.26554<br>2 | 0.84447<br>3 | 0.67260<br>6 | 1.93042<br>8 | 1.35723<br>4 | 1.21624<br>6 | 2.14695<br>5 | HMDB<br>01473 |
| docosadienoate (22:2n6)            | 1.03708<br>6 | 1.18587<br>5 | 0.94573<br>2 | 0.91097<br>2 | 1.17798<br>0 | 0.34922<br>2 | 1.11138<br>2 | 0.64372<br>8 | 0.64840<br>7 | 0.54289<br>4 | 0.60499<br>3 | 1.28953<br>6 | 0.56886<br>8 | 1.07806<br>9 | 0.34922<br>2 | 0.92755<br>6 | 0.68915<br>2 | 0.34922<br>2 |               |
| docosahexaenoate (DHA; 22:6n3)     | 1.21039<br>5 | 1.32917<br>1 | 0.80282<br>6 | 0.66834<br>1 | 0.88425<br>4 | 0.96957<br>3 | 0.78961<br>4 | 0.81949<br>5 | 0.54906<br>0 | 0.61104<br>2 | 1.03042<br>7 | 1.13317<br>4 | 1.86023<br>7 | 1.88699<br>8 | 0.32786<br>1 | 1.39553<br>9 | 1.83769<br>4 | 1.95627<br>7 | HMDB<br>02183 |
| docosapentaenoate (n3 DPA; 22:5n3) | 0.97955<br>7 | 0.94496<br>5 | 0.75970<br>4 | 0.78193<br>9 | 0.87725<br>7 | 0.70595<br>4 | 1.01177<br>6 | 0.98822<br>4 | 0.64368<br>5 | 0.67708<br>5 | 1.12402<br>9 | 1.33530<br>2 | 2.72145<br>3 | 2.69578<br>4 | 0.73895<br>2 | 1.83623<br>5 | 2.54451<br>7 | 2.63540<br>0 | HMDB<br>01976 |
| docosapentaenoate (n6 DPA; 22:5n6) | 0.18565<br>2 | 0.18565<br>2 | 0.18565<br>2 | 0.18565<br>2 | 0.18565<br>2 | 0.18565<br>2 | 0.99944<br>3 | 0.40731<br>4 | 0.44042<br>7 | 0.61249<br>4 | 0.35783<br>4 | 1.78581<br>0 | 1.00055<br>7 | 1.45323<br>8 | 0.18565<br>2 | 0.69592<br>8 | 1.00345<br>0 | 1.66218<br>2 | HMDB<br>13123 |
| eicosenoate (20:1n9 or 11)         | 0.57215<br>0 | 0.62891<br>9 | 0.67969<br>8 | 0.49669<br>0 | 0.50351<br>1 | 0.74198<br>8 | 1.02376<br>8 | 0.86738<br>6 | 0.97623<br>2 | 0.73259<br>0 | 1.15133<br>3 | 1.53650<br>2 | 0.33003<br>7 | 0.60001<br>6 | 0.23805<br>5 | 0.41741<br>4 | 0.49192<br>6 | 0.38851<br>5 | HMDB<br>02331 |
| ergothioneine                      | 0.67639<br>6 | 2.49280<br>1 | 0.84732<br>3 | 1.15267<br>7 | 3.05268<br>8 | 0.44276<br>1 | HMDB<br>03045 |
| erythritol                         | 2.28644<br>5 | 1.74577<br>2 | 1.65876<br>1 | 1.11180<br>7 | 2.38013<br>0 | 2.39358<br>3 | 0.49611<br>6 | 0.62891<br>9 | 0.89872<br>5 | 1.15927<br>1 | 1.49051<br>3 | 1.67996<br>7 | 0.67061<br>6 | 0.88298<br>2 | 2.73414<br>8 | 1.13175<br>7 | 1.64793<br>2 | 1.58793<br>4 | HMDB<br>02994 |

|                                      |              |              |              |              |              |              |              |              |              |              |              |              |              |              |              |              |              |              |               |
|--------------------------------------|--------------|--------------|--------------|--------------|--------------|--------------|--------------|--------------|--------------|--------------|--------------|--------------|--------------|--------------|--------------|--------------|--------------|--------------|---------------|
| erythronate*                         | 0.38695<br>7 | 0.71884<br>9 | 0.31533<br>7 | 0.31533<br>7 | 0.90895<br>1 | 0.66660<br>6 | 1.12863<br>0 | 1.07264<br>9 | 1.20502<br>3 | 1.25289<br>7 | 1.24978<br>6 | 1.02954<br>1 | 0.43123<br>9 | 0.60148<br>1 | 0.31533<br>7 | 0.46630<br>8 | 0.36958<br>3 | 0.61680<br>9 | HMDB<br>00613 |
| ethanolamine                         | 2.62501<br>6 | 1.93149<br>3 | 1.87554<br>2 | 1.33248<br>2 | 3.86134<br>3 | 3.55578<br>6 | 1.32487<br>0 | 1.01329<br>5 | 0.53768<br>8 | 0.64711<br>6 | 0.98670<br>5 | 0.74637<br>8 | 0.71662<br>7 | 1.06562<br>7 | 0.63485<br>8 | 1.06902<br>2 | 1.09575<br>6 | 1.45180<br>8 | HMDB<br>00149 |
| flavin adenine dinucleotide (FAD)    | 0.35608<br>2 | 0.71674<br>7 | 0.89989<br>0 | 1.35185<br>4 | 0.35608<br>2 | HMDB<br>01248 |
| fructose                             | 2.57809<br>8 | 3.05418<br>5 | 2.34406<br>5 | 1.42400<br>3 | 4.28955<br>1 | 2.17311<br>4 | 0.14569<br>6 | 0.19012<br>3 | 0.64648<br>4 | 0.75688<br>5 | 1.17124<br>4 | 1.65466<br>9 | 0.29796<br>0 | 0.50215<br>0 | 3.87963<br>9 | 3.63704<br>2 | 2.17311<br>4 | 2.21403<br>0 | HMDB<br>00660 |
| fructose-6-phosphate                 | 0.37866<br>7 | 0.25844<br>0 | 0.37068<br>1 | 0.12544<br>1 | 0.45944<br>3 | 0.32664<br>5 | 1.30019<br>3 | 1.36794<br>8 | 1.19093<br>7 | 2.07325<br>5 | 1.14339<br>6 | 1.42559<br>8 | 0.66665<br>1 | 0.75836<br>1 | 0.77724<br>1 | 0.61669<br>5 | 0.86248<br>9 | 0.68247<br>3 | HMDB<br>00124 |
| fumarate                             | 1.44806<br>6 | 1.52216<br>1 | 2.17555<br>7 | 1.02975<br>2 | 1.80760<br>9 | 1.71017<br>8 | 1.62762<br>4 | 0.92575<br>0 | 0.83683<br>5 | 0.97024<br>8 | 1.14853<br>9 | 0.82570<br>0 | 1.20170<br>7 | 0.96599<br>6 | 0.73875<br>8 | 0.61977<br>1 | 0.45104<br>5 | 0.44765<br>7 | HMDB<br>00134 |
| gamma-glutamylglutamate              | 1.24843<br>1 | 1.50624<br>4 | 1.33631<br>8 | 0.77352<br>6 | 1.43331<br>6 | 1.24862<br>3 | 1.37085<br>4 | 1.03124<br>3 | 0.80112<br>0 | 0.68809<br>7 | 1.24745<br>2 | 1.41322<br>3 | 0.74646<br>8 | 0.95120<br>9 | 0.67358<br>0 | 0.80450<br>5 | 0.62994<br>2 | 0.96875<br>7 |               |
| gamma-glutamylglutamine              | 1.13001<br>2 | 1.87453<br>8 | 1.00762<br>0 | 0.27105<br>0 | 0.27105<br>0 | 0.27105<br>0 | 0.27105<br>0 | 0.63746<br>0 | 0.33927<br>0 | 0.86658<br>0 | 1.62995<br>5 | 1.51500<br>4 | 0.27105<br>0 | 0.52349<br>2 | 2.51376<br>9 | 1.57339<br>0 | 1.65395<br>4 | 1.81838<br>1 | HMDB<br>11738 |
| gamma-glutamylleucine                | 0.38350<br>7 | 0.38350<br>7 | 0.38350<br>7 | 0.38350<br>7 | 0.38350<br>7 | 0.38350<br>7 | 1.03812<br>6 | 0.42759<br>6 | 0.59648<br>8 | 0.38350<br>7 | 0.71121<br>0 | 0.79948<br>0 | 0.38350<br>7 | 0.38350<br>7 | 0.38350<br>7 | 1.12090<br>7 | 0.88721<br>8 | 0.38350<br>7 | HMDB<br>11171 |
| glucose                              | 6.53446<br>1 | 8.91656<br>2 | 5.33900<br>5 | 3.19504<br>5 | #####<br>#   | 5.45484<br>4 | 0.16866<br>4 | 0.14007<br>0 | 0.24320<br>6 | 0.37095<br>9 | 0.67266<br>7 | 1.66867<br>2 | 0.36334<br>8 | 0.66387<br>2 | #####<br>#   | 3.11325<br>4 | 6.17637<br>1 | 5.62179<br>7 | HMDB<br>00122 |
| glucose 1-phosphate                  | 0.30432<br>9 | 0.30432<br>9 | 0.30432<br>9 | 0.30432<br>9 | 0.30432<br>9 | 0.30432<br>9 | 1.16974<br>7 | 0.97421<br>7 | 1.21419<br>7 | 1.36568<br>7 | 1.48703<br>1 | 1.09035<br>3 | 0.56206<br>0 | 0.64799<br>0 | 0.30432<br>9 | 1.00000<br>0 | 0.30432<br>9 | 0.30432<br>9 | HMDB<br>01586 |
| glucose-6-phosphate (G6P)            | 0.45336<br>9 | 0.32689<br>2 | 0.44192<br>8 | 0.18422<br>0 | 0.61565<br>9 | 0.30172<br>0 | 1.13919<br>3 | 1.00260<br>6 | 1.19694<br>6 | 2.29185<br>3 | 1.52260<br>5 | 1.52749<br>2 | 0.90708<br>5 | 1.01977<br>8 | 0.87731<br>3 | 0.94131<br>7 | 0.97662<br>2 | 1.07654<br>3 | HMDB<br>01401 |
| glutamate                            | 0.94644<br>1 | 0.99726<br>1 | 1.04069<br>6 | 0.68523<br>2 | 1.25582<br>9 | 1.10536<br>3 | 1.47197<br>2 | 1.37922<br>9 | 0.73212<br>0 | 0.62171<br>6 | 0.95769<br>8 | 1.08590<br>2 | 2.00250<br>8 | 1.91931<br>8 | 1.48836<br>0 | 1.01388<br>4 | 1.00273<br>9 | 1.15223<br>8 | HMDB<br>03339 |
| glutamate, gamma-methyl ester        | 0.30409<br>5 | 0.30409<br>5 | 2.39442<br>0 | 0.30409<br>5 | 2.92238<br>0 | 0.30409<br>5 | 1.66381<br>3 | 1.32340<br>0 | 0.49776<br>1 | 0.71215<br>1 | 0.74138<br>9 | 0.30409<br>5 | 0.94363<br>7 | 0.91440<br>6 | 0.30409<br>5 | 0.30409<br>5 | 0.30409<br>5 | 0.30409<br>5 |               |
| glutamine                            | 1.10237<br>2 | 1.37863<br>7 | 1.04628<br>4 | 0.73417<br>8 | 1.59009<br>7 | 1.16551<br>7 | 0.59265<br>0 | 0.67458<br>8 | 0.31159<br>2 | 0.41798<br>3 | 0.58403<br>1 | 0.59124<br>4 | 1.05670<br>2 | 1.22697<br>5 | 3.07986<br>0 | 1.65064<br>9 | 1.59741<br>1 | 1.55790<br>4 | HMDB<br>00641 |
| glutathione, oxidized (GSSG)         | 3.10634<br>8 | 3.40979<br>9 | 3.48595<br>6 | 2.07327<br>7 | 5.13067<br>7 | 3.22519<br>4 | 0.80837<br>2 | 0.83438<br>3 | 0.97171<br>4 | 0.78576<br>0 | 1.43608<br>4 | 1.55349<br>7 | 2.48816<br>6 | 2.87429<br>4 | 8.36846<br>3 | 6.27663<br>5 | 5.44547<br>0 | 6.86375<br>9 | HMDB<br>03337 |
| glutathione, reduced (GSH)           | 1.84905<br>6 | 1.42885<br>6 | 1.94647<br>9 | 1.15944<br>4 | 2.39775<br>6 | 2.33683<br>2 | 1.16056<br>0 | 1.09517<br>2 | 0.86153<br>2 | 0.66998<br>6 | 0.88404<br>0 | 1.02684<br>6 | 1.75950<br>6 | 2.03382<br>8 | 1.90861<br>7 | 1.25399<br>6 | 1.01145<br>3 | 0.95238<br>2 | HMDB<br>00125 |
| glycerol 2-phosphate                 | 2.00446<br>8 | 1.65744<br>7 | 1.95418<br>0 | 1.27133<br>0 | 2.15510<br>8 | 2.77372<br>9 | 1.19945<br>3 | 0.86414<br>9 | 0.89251<br>4 | 1.12129<br>0 | 1.68199<br>6 | 1.54316<br>8 | 0.80470<br>4 | 0.52445<br>3 | 1.06958<br>6 | 0.79970<br>1 | 1.53816<br>8 | 1.89499<br>7 | HMDB<br>02520 |
| glycerol 3-phosphate (G3P)           | 1.55706<br>3 | 1.49290<br>6 | 1.66332<br>8 | 0.96756<br>4 | 1.92202<br>3 | 1.75176<br>8 | 1.47991<br>0 | 1.01936<br>6 | 0.96392<br>2 | 1.08712<br>4 | 2.58619<br>4 | 2.16225<br>1 | 0.68875<br>9 | 0.62666<br>3 | 0.63037<br>7 | 0.66702<br>0 | 1.93284<br>3 | 1.72706<br>4 | HMDB<br>00126 |
| glycerophosphorylcholine (GPC)       | 2.02242<br>7 | 1.96562<br>6 | 2.27392<br>9 | 1.38149<br>3 | 2.73659<br>3 | 2.47656<br>6 | 1.25876<br>1 | 1.17403<br>4 | 0.95372<br>7 | 0.86002<br>1 | 2.11033<br>2 | 2.40110<br>7 | 0.72841<br>2 | 0.74549<br>7 | 1.04627<br>3 | 0.84246<br>4 | 2.13272<br>1 | 2.30984<br>0 | HMDB<br>00086 |
| glycine                              | 0.88391<br>9 | 0.88063<br>4 | 0.89506<br>6 | 0.54570<br>2 | 1.17175<br>1 | 0.91071<br>9 | 1.24302<br>8 | 0.99771<br>9 | 0.64350<br>9 | 0.65270<br>1 | 1.28382<br>5 | 1.06138<br>4 | 0.98699<br>7 | 1.22719<br>8 | 0.86537<br>3 | 0.87962<br>1 | 1.00228<br>1 | 0.95402<br>0 | HMDB<br>00123 |
| glycylleucine                        | 1.00000<br>0 | 1.35804<br>3 | 2.48195<br>6 | 0.72633<br>3 | 1.57329<br>2 | 1.19964<br>8 | 1.09339<br>6 | 0.77593<br>2 | 0.57321<br>2 | 0.56642<br>8 | 0.58191<br>0 | 0.76818<br>0 | 1.10383<br>8 | 0.53949<br>9 | 0.50615<br>5 | 1.19510<br>6 | 1.56684<br>7 | 2.85429<br>5 | HMDB<br>00759 |
| guanine                              | 0.45828<br>1 | 0.35483<br>3 | 0.93779<br>1 | 0.40026<br>9 | 0.77589<br>6 | 0.64233<br>6 | 2.74255<br>6 | 2.45476<br>7 | 1.27045<br>0 | 0.95068<br>0 | 2.04150<br>1 | 2.29622<br>2 | 0.81874<br>3 | 0.98851<br>9 | 1.39109<br>0 | 0.64660<br>5 | 0.50110<br>3 | 1.12389<br>2 | HMDB<br>00132 |
| guanosine                            | 0.45881<br>7 | 0.32587<br>6 | 0.41607<br>2 | 0.22040<br>0 | 0.37950<br>5 | 0.45179<br>3 | 2.16885<br>4 | 2.07054<br>0 | 1.86317<br>9 | 1.31567<br>1 | 1.72962<br>2 | 2.23138<br>3 | 0.87832<br>8 | 0.97128<br>0 | 1.44209<br>6 | 0.74886<br>1 | 0.82560<br>5 | 0.84334<br>9 | HMDB<br>00133 |
| guanosine 5'- monophosphate (5'-GMP) | 6.45144<br>8 | 5.51071<br>3 | 6.18065<br>4 | 3.78921<br>6 | 8.81091<br>5 | 7.89701<br>2 | 0.10861<br>5 | 0.07257<br>4 | 0.03755<br>7 | 0.03755<br>7 | 0.04768<br>2 | 0.03755<br>7 | 0.12131<br>0 | 0.09164<br>9 | 0.03755<br>7 | 0.03755<br>7 | 0.03755<br>7 | 0.03755<br>7 |               |
| gulono-1,4-lactone                   | 0.09621<br>9 | 0.09621<br>9 | 0.09621<br>9 | 0.09621<br>9 | 0.09621<br>9 | 0.09621<br>9 | 0.49449<br>4 | 0.63155<br>0 | 0.09621<br>9 | 0.60229<br>9 | 0.09621<br>9 | 0.24912<br>8 | 0.09621<br>9 | 0.09621<br>9 | 0.09621<br>9 | 0.09621<br>9 | 0.09621<br>9 | 0.09621<br>9 | HMDB<br>03466 |
| HEPES                                | 2.20921<br>8 | 2.34825<br>7 | 2.36226<br>5 | 1.53740<br>7 | 3.04228<br>1 | 2.79321<br>1 | 0.60502<br>0 | 0.53907<br>3 | 0.82039<br>0 | 0.74502<br>7 | 1.33818<br>8 | 1.56963<br>3 | 0.59479<br>5 | 0.79663<br>1 | 3.19510<br>9 | 1.47263<br>5 | 1.98862<br>0 | 2.05152<br>5 |               |
| hippurate                            | 1.60021<br>7 | 1.84569<br>8 | 0.39093<br>4 | 1.10410<br>7 | 0.39093<br>4 | 2.55686<br>6 | 0.39093<br>4 | 0.39093<br>4 | 0.59479<br>3 | 0.49527<br>8 | 1.25937<br>6 | 1.27366<br>7 | 0.39093<br>4 | 0.39093<br>4 | 3.67641<br>6 | 0.39093<br>4 | 0.39093<br>4 | 1.68422<br>5 | HMDB<br>00714 |
| histidine                            | 0.93371<br>1 | 1.15695<br>1 | 1.11322<br>0 | 0.92362<br>7 | 1.56079<br>8 | 1.31409<br>1 | 0.80156<br>2 | 0.63883<br>9 | 0.66229<br>5 | 0.60142<br>2 | 0.92762<br>8 | 1.07970<br>1 | 0.71242<br>8 | 0.75379<br>7 | 1.58810<br>2 | 1.20355<br>2 | 1.36116<br>6 | 1.46999<br>3 | HMDB<br>00177 |

|                                                                                                |              |              |              |              |              |              |              |              |              |              |              |              |              |              |              |              |              |              |               |               |
|------------------------------------------------------------------------------------------------|--------------|--------------|--------------|--------------|--------------|--------------|--------------|--------------|--------------|--------------|--------------|--------------|--------------|--------------|--------------|--------------|--------------|--------------|---------------|---------------|
| hydroxyisovaleroyl carnitine                                                                   | 3.42666<br>1 | 3.14372<br>3 | 1.93624<br>8 | 1.00000      | 3.10538<br>3 | 3.61590<br>3 | 0.31220<br>3 | 0.62450<br>0 | 0.31220<br>3 | 0.49337<br>9 | 0.31220<br>3 | 1.08563<br>9 | 0.31220<br>3 | 0.60466<br>2 | 1.19210<br>9 | 0.31220<br>3 | 0.31220<br>3 | 0.31220<br>3 |               |               |
| hypotaurine                                                                                    | 0.56341<br>0 | 0.61031<br>7 | 0.42458<br>4 | 0.41727<br>6 | 1.07450<br>7 | 0.61541<br>3 | 2.22986<br>8 | 1.49596<br>7 | 1.18227<br>2 | 1.66765<br>5 | 2.41589<br>6 | 1.48858<br>1 | 0.59434<br>9 | 0.92549<br>3 | 1.12436<br>8 | 1.45291<br>2 | 1.66592<br>6 | 1.41417<br>5 | HMDB<br>00965 |               |
| hypoxanthine                                                                                   | 0.73915<br>6 | 0.58002<br>2 | 0.72143<br>0 | 0.43863<br>9 | 0.76671<br>0 | 0.80523<br>8 | 1.27372<br>7 | 1.07775<br>9 | 1.03013<br>9 | 1.04394<br>1 | 1.65899<br>0 | 1.63759<br>0 | 0.99710<br>1 | 1.17966<br>5 | 1.71581<br>9 | 1.29097<br>8 | 1.42561<br>1 | 1.55310<br>8 | HMDB<br>00157 |               |
| inosine                                                                                        | 0.43166<br>6 | 0.38411<br>6 | 0.43552<br>4 | 0.24311<br>9 | 0.41313<br>0 | 0.48280<br>2 | 1.24774<br>0 | 1.01302<br>8 | 1.22412<br>9 | 1.12547<br>8 | 1.18999<br>6 | 1.41326<br>2 | 0.92371<br>0 | 1.07601<br>6 | 1.76129<br>0 | 1.16121<br>7 | 1.12045<br>9 | 1.15779<br>5 |               |               |
| inosine 5'-monophosphate (IMP)                                                                 | 2.37607<br>9 | 2.38587<br>2 | 2.37141<br>4 | 1.70910<br>8 | 3.41447<br>6 | 2.61949<br>0 | 0.09400<br>7  | HMDB<br>00175 |
| inositol 1-phosphate (IIP)                                                                     | 0.67533<br>6 | 0.98321<br>2 | 0.61677<br>6 | 0.48670<br>1 | 0.89782<br>3 | 0.62194<br>8 | 2.53350<br>1 | 1.83085<br>6 | 0.52977<br>9 | 0.69966<br>3 | 0.78745<br>4 | 1.00044<br>0 | 3.67099<br>5 | 2.90534<br>6 | 0.91751<br>0 | 1.66072<br>9 | 1.72402<br>7 | 1.46960<br>5 | HMDB<br>00213 |               |
| Isobar: 2-propylpentanoate, 2-ethylhexanoate                                                   | 0.39037<br>1 | 3.22592<br>3 | 0.39037<br>1 | 0.39037<br>1 | 0.39037<br>1 | 0.39037<br>1 | 0.90437<br>8 | 0.86190<br>8 | 0.39037<br>1 | 0.56415<br>0 | 0.39037<br>1 | 0.39037<br>1 | 1.00246<br>6 | 1.67872<br>7 | 2.77846<br>6 | 1.20681<br>3 | 1.95695<br>7 | 1.69607<br>2 |               |               |
| Isobar: fructose 1,6-diphosphate, glucose 1,6-diphosphate, myo-inositol 1,4 or 1,3-diphosphate | 0.71103<br>0 | 0.98186<br>6 | 1.10453<br>4 | 0.68071<br>0 | 1.21182<br>9 | 0.87471<br>4 | 1.03302<br>1 | 0.79852<br>0 | 5.32147<br>4 | 3.25207<br>9 | 2.15664<br>5 | 3.55318<br>4 | 0.83922<br>9 | 1.15740<br>8 | 1.51342<br>9 | 1.62196<br>7 | 0.86435<br>4 | 0.97969<br>4 |               |               |
| Isobar: ribulose 5-phosphate, xylulose 5-phosphate                                             | 1.48558<br>1 | 1.72788<br>8 | 1.02649<br>7 | 0.48864<br>1 | 0.97350<br>3 | 1.27576<br>7 | 0.96251<br>0 | 0.66459<br>4 | 2.04621<br>1 | 1.92904<br>9 | 1.62124<br>4 | 3.23122<br>2 | 0.62860<br>1 | 0.90897<br>8 | 5.95318<br>7 | 1.69263<br>4 | 2.56822<br>5 | 2.48985<br>1 |               |               |
| Isobar: UDP-acetylglucosamine, UDP-acetylgalactosamine                                         | 1.12955<br>2 | 1.17254<br>3 | 1.46284<br>6 | 0.76796<br>6 | 1.50803<br>0 | 1.57359<br>4 | 0.07901<br>8 | 0.08246<br>4 | 1.09687<br>3 | 1.46234<br>7 | 1.08930<br>2 | 1.30606<br>8 | 0.06926<br>2 | 0.20781<br>5 | 0.82568<br>3 | 0.45224<br>4 | 0.61182<br>3 | 0.52531<br>1 |               |               |
| isoleucine                                                                                     | 1.34963<br>7 | 1.35599<br>3 | 1.26935<br>5 | 0.81836<br>9 | 1.72584<br>0 | 1.39319<br>2 | 0.56940<br>0 | 0.50516<br>8 | 0.60703<br>9 | 0.67078<br>6 | 1.01449<br>7 | 1.23150<br>4 | 0.44314<br>5 | 0.56827<br>4 | 1.92207<br>8 | 0.98550<br>3 | 1.44877<br>3 | 1.51163<br>3 | HMDB<br>00172 |               |
| isoleucylglycine                                                                               | 2.54770<br>2 | 0.48943<br>7 | 1.55832<br>0 | 2.81733<br>6 | 4.66710<br>2 | 0.48943<br>7 | 1.08374<br>2 | 0.69081<br>2 | 0.82485<br>7 | 0.75932<br>6 | 0.48943<br>7 | 0.48943<br>7 | 0.98768<br>2 | 0.76266<br>9 | 0.48943<br>7 | 2.50481<br>5 | 2.71357<br>9 | 2.31609<br>1 |               |               |
| isoleucylleucine                                                                               | 0.19895<br>5 | 0.19895<br>5 | 0.94745<br>5 | 0.64171<br>9 | 0.19895<br>5 | 0.89550<br>9 | 1.53108<br>5 | 1.44070<br>4 | 0.19895<br>5 | 0.19895<br>5 | 0.19895<br>5 | 0.19895<br>5 | 1.05254<br>6 | 1.16921<br>9 | 0.19895<br>5 | 0.19895<br>5 | 0.19895<br>5 | 0.19895<br>5 | 0.62104<br>5  |               |
| kynurenine                                                                                     | 0.37442<br>6 | 0.37442<br>6 | 0.37442<br>6 | 0.37442<br>6 | 0.37442<br>6 | 0.37442<br>6 | 1.31117<br>4 | 0.75476<br>1 | 0.37442<br>6 | 0.46480<br>3 | 0.49694<br>5 | 0.37442<br>6  | HMDB<br>00684 |
| lactate                                                                                        | 1.21733<br>7 | 1.45612<br>3 | 1.05762<br>3 | 0.89669<br>3 | 1.62981<br>9 | 1.36218<br>1 | 0.86654<br>7 | 0.72606<br>2 | 0.91039<br>4 | 1.41318<br>2 | 1.79638<br>1 | 1.58305<br>4 | 0.51543<br>6 | 0.74690<br>2 | 1.68862<br>2 | 0.79358<br>2 | 0.93543<br>3 | 0.98627<br>9 | HMDB<br>00190 |               |
| laurate (12:0)                                                                                 | 1.96754<br>7 | 2.08528<br>2 | 2.04388<br>5 | 1.38672<br>2 | 2.42198<br>0 | 2.19532<br>0 | 0.42545<br>9 | 0.40190<br>5 | 0.50377<br>0 | 0.57434<br>9 | 0.96943<br>2 | 1.19857<br>5 | 0.96269<br>5 | 1.29559<br>7 | 2.25674<br>7 | 1.53834<br>4 | 1.68607<br>0 | 1.63572<br>9 | HMDB<br>00638 |               |
| leucine                                                                                        | 1.22103<br>5 | 1.30429<br>0 | 1.05268<br>9 | 0.77677<br>0 | 1.64370<br>2 | 1.34791<br>6 | 0.83390<br>3 | 0.75207<br>2 | 0.53998<br>8 | 0.61994<br>8 | 0.86221<br>4 | 1.10290<br>2 | 0.60065<br>2 | 0.80048<br>5 | 1.67363<br>1 | 0.98410<br>2 | 1.37158<br>5 | 1.48506<br>6 | HMDB<br>00687 |               |
| leucylaspartate                                                                                | 0.26195<br>0 | 1.47378<br>9 | 0.26195<br>0 | 0.26195<br>0 | 0.26195<br>0 | 0.26195<br>0 | 2.26063<br>2 | 1.86536<br>7 | 0.26195<br>0 | 0.26195<br>0 | 0.26195<br>0 | 0.26195<br>0 | 1.00000<br>0 | 0.90243<br>3 | 0.26195<br>0 | 0.26195<br>0 | 0.26195<br>0 | 0.26195<br>0 |               |               |
| leucylglycine                                                                                  | 1.07349<br>5 | 0.20083<br>7 | 1.10776<br>1 | 1.34191<br>8 | 4.26692<br>6 | 0.20083<br>7 | 1.00000<br>0 | 0.59673<br>8 | 0.20083<br>7 | 0.20083<br>7 | 0.20083<br>7 | 0.20083<br>7 | 1.58285<br>1 | 0.68574<br>7 | 0.20083<br>7 | 1.54616<br>5 | 1.14888<br>3 | 0.20083<br>7 |               |               |
| leucylleucine                                                                                  | 0.47778<br>6 | 0.47778<br>6 | 0.47778<br>6 | 0.47778<br>6 | 0.47778<br>6 | 0.47778<br>6 | 4.15440<br>7 | 2.80570<br>6 | 0.52631<br>5 | 0.47778<br>6 | 0.54821<br>1 | 0.47778<br>6 | 0.47778<br>6 | 0.47778<br>6 | 4.15412<br>3 | 0.47778<br>6 | 2.35168<br>4 | 4.11757<br>2 |               |               |
| leucylphenylalanine                                                                            | 0.43262<br>9 | 0.43262<br>9 | 1.00000<br>0 | 0.43262<br>9 | 0.43262<br>9 | 0.43262<br>9 | 1.69574<br>2 | 1.28065<br>7 | 0.43262<br>9 | 0.43262<br>9 | 0.43262<br>9 | 0.43262<br>9 | 0.43262<br>9 | 1.41617<br>6 | 0.43262<br>9 | 0.43262<br>9 | 0.43262<br>9 | 0.43262<br>9 |               |               |
| lignocerate (24:0)                                                                             | 1.13302<br>0 | 1.07326<br>9 | 0.75954<br>1 | 0.95344<br>6 | 0.39005<br>5 | 0.55492<br>9 | 0.58767<br>2 | 0.49645<br>1 | 0.39005<br>5 | 1.05193<br>9 | 1.31851<br>6 | 0.72971<br>4 | 1.10689<br>3 | 0.39005<br>5 | 0.86672<br>7 | 0.39005<br>5 | 1.56074<br>8 | 0.89795<br>6 | HMDB<br>02003 |               |
| linoleate (18:2n6)                                                                             | 1.14360<br>8 | 1.47927<br>5 | 1.28880<br>2 | 0.91474<br>9 | 1.12978<br>5 | 1.32437<br>5 | 0.74594<br>2 | 0.63105<br>8 | 0.63258<br>1 | 0.69060<br>7 | 1.02188<br>2 | 0.77750<br>6 | 1.15881<br>0 | 1.12414<br>2 | 0.42780<br>1 | 0.81295<br>9 | 0.98601<br>5 | 1.01398<br>5 | HMDB<br>00673 |               |
| lysine                                                                                         | 1.80136<br>4 | 2.22300<br>9 | 1.02165<br>5 | 1.47028<br>8 | 1.75620<br>2 | 1.99792<br>3 | 0.50308<br>3 | 0.44062<br>5 | 0.42139<br>7 | 0.44597<br>4 | 0.92887<br>0 | 1.12951<br>2 | 0.54707<br>9 | 1.91332<br>5 | 2.53854<br>1 | 1.40185<br>6 | 1.66759<br>7 | 1.81497<br>9 | HMDB<br>00182 |               |
| malate                                                                                         | 2.19242<br>8 | 1.95607<br>9 | 2.08540<br>2 | 1.15503<br>2 | 2.59376<br>0 | 2.48313<br>0 | 1.09281<br>8 | 0.84685<br>5 | 1.04424<br>4 | 1.16548<br>4 | 1.50024<br>6 | 1.19642<br>3 | 0.62440<br>0 | 0.86165<br>2 | 0.76053<br>7 | 0.57297<br>6 | 0.31024<br>5 | 0.28300<br>5 | HMDB<br>00156 |               |
| maltotetraose                                                                                  | 0.30424<br>2 | 0.30424<br>2 | 0.30424<br>2 | 0.30424<br>2 | 0.30424<br>2 | 0.30424<br>2 | 0.76981<br>8 | 0.74140<br>9 | 0.31955<br>7 | 0.30424<br>2 | 1.48994<br>6 | 0.87006<br>1 | 0.30424<br>2  | HMDB<br>01296 |
| mannose-6-phosphate                                                                            | 0.52593<br>4 | 0.39604<br>0 | 0.47892<br>7 | 0.21813<br>1 | 0.68106<br>6 | 0.36077<br>6 | 1.32884<br>5 | 0.96524<br>1 | 1.16670<br>5 | 1.74214<br>9 | 1.64069<br>2 | 1.56178<br>7 | 0.83364<br>5 | 1.07550<br>3 | 0.75397<br>4 | 0.91252<br>1 | 0.97611<br>9 | 1.09517<br>0 | HMDB<br>01078 |               |
| mead acid (20:3n9)                                                                             | 0.49330<br>1 | 0.49330<br>1 | 0.49330<br>1 | 0.49330<br>1 | 0.49330<br>1 | 0.49330<br>1 | 0.73220<br>4 | 0.77720<br>9 | 0.75315<br>5 | 0.75609<br>5 | 1.63648<br>0 | 0.86001<br>2 | 0.96798<br>1 | 0.55053<br>0 | 0.49330<br>1 | 0.96618<br>8 | 1.30699<br>3 | 1.16903<br>0 | HMDB<br>10378 |               |



|                                                            |              |              |              |              |              |              |              |              |              |              |              |              |              |              |              |              |              |              |               |
|------------------------------------------------------------|--------------|--------------|--------------|--------------|--------------|--------------|--------------|--------------|--------------|--------------|--------------|--------------|--------------|--------------|--------------|--------------|--------------|--------------|---------------|
| methionine                                                 | 2.05956<br>0 | 2.40039<br>9 | 2.01241<br>6 | 1.46281<br>7 | 2.93569<br>5 | 2.60353<br>0 | 0.88172<br>9 | 0.77462<br>7 | 0.68853<br>2 | 0.60047<br>8 | 1.00343<br>1 | 1.36778<br>6 | 0.90705<br>5 | 1.05816<br>7 | 2.62411<br>9 | 1.64270<br>3 | 2.03362<br>0 | 2.04958<br>7 | HMDB<br>00696 |
| methyl palmitate (15 or 2)                                 | 1.63910<br>1 | 1.87053<br>2 | 1.70063<br>8 | 1.33449<br>3 | 1.94839<br>5 | 1.97217<br>0 | 0.55490<br>3 | 0.51556<br>2 | 0.66262<br>1 | 0.60352<br>1 | 1.01743<br>1 | 1.31214<br>4 | 1.04529<br>3 | 0.95145<br>0 | 2.21985<br>1 | 1.55508<br>6 | 1.85302<br>5 | 2.00979<br>3 |               |
| methylphosphate                                            | 1.36624<br>8 | 1.88462<br>8 | 0.79195<br>5 | 1.00000<br>0 | 1.81272<br>2 | 1.43813<br>7 | 1.10536<br>7 | 0.69902<br>0 | 0.86315<br>0 | 1.00838<br>6 | 1.48863<br>0 | 1.02925<br>0 | 0.60651<br>7 | 0.47561<br>5 | 0.47561<br>5 | 1.01195<br>2 | 2.14980<br>1 | 1.63527<br>0 |               |
| myo-inositol                                               | 7.02074<br>0 | 5.28586<br>9 | 5.79242<br>2 | 2.43099<br>6 | 9.29877<br>1 | 5.17657<br>1 | 0.61905<br>9 | 0.47976<br>1 | 0.62794<br>2 | 0.81003<br>6 | 0.71592<br>7 | 1.14501<br>1 | 1.35738<br>5 | 1.73968<br>7 | 2.75303<br>7 | 1.90220<br>1 | 3.27271<br>4 | 3.62287<br>2 | HMDB<br>00211 |
| myo-inositol pentakisphosphate<br>(1,2,4,5,6 or 1,3,4,5,6) | 0.53935<br>7 | 0.53935<br>7 | 0.53935<br>7 | 0.53935<br>7 | 0.53935<br>7 | 0.53935<br>7 | 1.00000<br>0 | 1.12396<br>7 | 0.53935<br>7 |               |
| myristate (14:0)                                           | 1.36617<br>2 | 1.61593<br>8 | 1.68324<br>1 | 1.17446<br>5 | 1.55982<br>8 | 1.48541<br>5 | 0.59626<br>8 | 0.50122<br>5 | 0.59203<br>5 | 0.61178<br>3 | 1.06312<br>0 | 1.20748<br>6 | 0.95095<br>7 | 0.95041<br>6 | 1.65296<br>3 | 1.04904<br>2 | 1.35266<br>1 | 1.71932<br>1 | HMDB<br>00806 |
| myristoleate (14:1n5)                                      | 1.37241<br>2 | 1.54119<br>9 | 1.96033<br>5 | 1.08013<br>1 | 2.61619<br>9 | 1.84564<br>3 | 0.57350<br>6 | 0.51097<br>7 | 0.56932<br>0 | 0.54860<br>9 | 1.14757<br>7 | 0.95200<br>4 | 0.90867<br>1 | 1.00490<br>5 | 1.47156<br>9 | 1.12897<br>0 | 1.13307<br>1 | 1.40083<br>0 | HMDB<br>02000 |
| N-acetyllalanine                                           | 0.41335<br>0 | 0.41335<br>0 | 0.41335<br>0 | 0.41335<br>0 | 0.41335<br>0 | 0.41335<br>0 | 1.20984<br>6 | 1.04380<br>6 | 0.82559<br>2 | 0.74811<br>3 | 1.28353<br>8 | 1.00000<br>0 | 0.41335<br>0 | 0.67025<br>1 | 0.41335<br>0 | 0.41335<br>0 | 0.41335<br>0 | 0.41335<br>0 | HMDB<br>00766 |
| N-acetylmethionine                                         | 0.66098<br>7 | 0.60230<br>9 | 0.62150<br>7 | 0.48150<br>2 | 0.77349<br>2 | 0.48150<br>2 | 1.09981<br>8 | 0.87492<br>7 | 1.08874<br>2 | 1.01715<br>4 | 1.91639<br>7 | 1.59090<br>1 | 0.72583<br>8 | 1.00798<br>0 | 0.83266<br>3 | 1.00000<br>0 | 1.17885<br>0 | 1.42152<br>6 | HMDB<br>11745 |
| N-acetylneuramate                                          | 0.24288<br>9 | 0.24288<br>9 | 0.24288<br>9 | 0.24288<br>9 | 0.24288<br>9 | 0.24288<br>9 | 1.91455<br>2 | 2.08410<br>5 | 0.87651<br>9 | 0.97353<br>0 | 1.40694<br>0 | 1.44045<br>2 | 1.52462<br>9 | 1.54172<br>5 | 0.58130<br>0 | 1.10284<br>1 | 1.16914<br>5 | 0.24288<br>9 | HMDB<br>00230 |
| N-acetylmethionine                                         | 2.99477<br>4 | 2.76696<br>3 | 3.34892<br>0 | 2.27865<br>8 | 3.94844<br>9 | 4.27329<br>2 | 0.33628<br>2 | 0.33628<br>2 | 0.68608<br>3 | 0.66005<br>1 | 1.24075<br>8 | 1.59189<br>2 | 0.47767<br>6 | 0.33628<br>8 | 2.53455<br>8 | 1.17288<br>8 | 0.33628<br>2 | 1.65451<br>6 | HMDB<br>03357 |
| N-acetylserine                                             | 1.25699<br>1 | 1.12876<br>4 | 1.18592<br>3 | 0.61404<br>8 | 1.81702<br>6 | 1.66692<br>4 | 0.80563<br>7 | 0.70440<br>3 | 0.80560<br>0 | 0.96522<br>7 | 1.00016<br>7 | 1.18375<br>2 | 0.43827<br>1 | 0.71091<br>2 | 1.01190<br>3 | 0.99983<br>3 | 0.88364<br>9 | 0.43827<br>1 | HMDB<br>02931 |
| N-acetylthreonine                                          | 0.59407<br>9 | 0.59407<br>9 | 0.59407<br>9 | 0.59407<br>9 | 0.59407<br>9 | 0.59407<br>9 | 1.12464<br>2 | 1.04091<br>7 | 0.97900<br>1 | 0.77717<br>1 | 1.25895<br>0 | 1.04500<br>1 | 0.59407<br>9 | 0.67896<br>2 | 0.59407<br>9 | 0.59407<br>9 | 0.59407<br>9 | 0.59407<br>9 |               |
| N-carbamoylaspartate                                       | 0.40004<br>1 | 3.63726<br>2 | 2.31159<br>0 | 0.86204<br>0 | 0.40004<br>1 | HMDB<br>00828 |
| N-glycolylneuramate                                        | 0.43265<br>1 | 0.43265<br>1 | 0.43265<br>1 | 0.43265<br>1 | 0.58965<br>0 | 0.43265<br>1 | 2.56348<br>4 | 2.19426<br>5 | 0.92267<br>5 | 1.89130<br>7 | 2.09694<br>7 | 0.43265<br>1 | 1.41915<br>6 | 0.43265<br>1 | 0.43265<br>1 | 1.58443<br>5 | 0.43265<br>1 | 2.75799<br>8 | HMDB<br>00833 |
| NI-methyladenosine                                         | 4.11383<br>4 | 1.85319<br>7 | 2.21209<br>0 | 2.07095<br>2 | 4.19856<br>3 | 4.18606<br>4 | 0.34497<br>2 | 0.79754<br>6 | 0.55043<br>9 | 1.00000<br>0 | 1.03942<br>7 | 0.34497<br>2 | 0.86379<br>4 | 0.34497<br>2 | 0.34497<br>2 | 0.34497<br>2 | 0.34497<br>2 | 0.34497<br>2 | HMDB<br>03331 |
| nicotinamide                                               | 1.89289<br>3 | 1.74259<br>8 | 1.79944<br>3 | 1.22100<br>2 | 2.61424<br>0 | 2.39391<br>9 | 1.19206<br>1 | 1.11568<br>2 | 0.70028<br>3 | 0.64299<br>9 | 1.00526<br>2 | 1.18348<br>4 | 0.80362<br>5 | 1.07802<br>9 | 1.22467<br>9 | 0.92814<br>4 | 1.08747<br>9 | 0.99473<br>8 | HMDB<br>01406 |
| nicotinamide adenine dinucleotide<br>(NAD+)                | 0.49082<br>2 | 0.49082<br>2 | 1.31492<br>1 | 1.05101<br>3 | 0.49082<br>2 | 0.49082<br>2 | 1.31979<br>5 | 1.06163<br>1 | 1.10384<br>8 | 1.16941<br>9 | 1.64675<br>2 | 0.90486<br>0 | 0.98550<br>5 | 1.08633<br>8 | 0.49082<br>2 | 0.49082<br>2 | 0.49082<br>2 | 0.49082<br>2 | HMDB<br>00902 |
| oleate (18:1n9)                                            | 0.77915<br>4 | 1.11037<br>6 | 0.62083<br>8 | 1.58515<br>3 | 1.15853<br>3 | 0.73445<br>4 | 0.86923<br>8 | 0.50071<br>4 | 1.07815<br>9 | 1.51278<br>2 | 1.75544<br>9 | 1.17202<br>9 | 0.37297<br>3 | 0.37981<br>7 | 0.58985<br>7 | 0.61421<br>1 | 0.92319<br>9 | 0.82160<br>5 | HMDB<br>00207 |
| ornithine                                                  | 0.75887<br>1 | 1.74666<br>1 | 0.76092<br>0 | 0.66849<br>9 | 1.01229<br>1 | 0.95958<br>9 | 0.70907<br>9 | 0.72809<br>9 | 1.34482<br>7 | 1.65673<br>3 | 1.71581<br>3 | 2.16415<br>0 | 0.50115<br>7 | 0.96572<br>7 | 2.37522<br>1 | 1.82726<br>1 | 1.91175<br>8 | 1.69996<br>9 | HMDB<br>03374 |
| orotate                                                    | 0.15995<br>5 | 0.52636<br>6 | 1.23534<br>9 | 0.15995<br>5 | 1.00456<br>9 | 1.36610<br>7 | 1.35341<br>0 | 0.91758<br>0 | 2.67885<br>3 | 2.73142<br>8 | 0.40364<br>5 | 0.99543<br>1 | 1.21980<br>6 | 0.31780<br>2 | 1.30512<br>2 | 0.72316<br>4 | 0.15995<br>5 | 0.15995<br>5 | HMDB<br>00226 |
| palmitate (16:0)                                           | 1.33979<br>8 | 1.48499<br>1 | 2.10167<br>4 | 1.05213<br>3 | 1.78778<br>6 | 1.61697<br>5 | 0.59989<br>0 | 0.52111<br>9 | 0.57180<br>0 | 0.63520<br>5 | 0.85686<br>8 | 1.06011<br>8 | 1.01381<br>0 | 1.03154<br>2 | 1.92818<br>2 | 1.33616<br>7 | 1.35934<br>5 | 1.51173<br>6 | HMDB<br>00220 |
| palmitoleate (16:1n7)                                      | 0.79791<br>8 | 1.68653<br>9 | 1.08930<br>4 | 0.78370<br>1 | 1.50258<br>9 | 1.36108<br>1 | 0.79455<br>1 | 0.68651<br>3 | 0.65003<br>9 | 0.77955<br>6 | 1.02345<br>2 | 1.01413<br>5 | 0.76241<br>0 | 0.81562<br>9 | 1.07135<br>6 | 1.06302<br>4 | 1.19548<br>2 | 0.97618<br>7 | HMDB<br>03229 |
| palmitoyl sphingomyelin                                    | 0.80289<br>7 | 1.10486<br>0 | 0.72172<br>3 | 0.54076<br>1 | 0.89514<br>0 | 0.78418<br>4 | 0.67465<br>6 | 0.43077<br>0 | 0.39954<br>7 | 0.44495<br>1 | 0.82104<br>3 | 0.65036<br>3 | 1.59422<br>4 | 1.29306<br>5 | 0.83513<br>9 | 1.73271<br>0 | 3.19662<br>8 | 2.44513<br>2 |               |
| pantothenate                                               | 0.82404<br>3 | 1.05445<br>4 | 0.96855<br>5 | 0.66142<br>8 | 1.26843<br>5 | 1.10405<br>4 | 1.56722<br>1 | 1.23036<br>7 | 1.28640<br>3 | 1.14324<br>2 | 0.79030<br>3 | 1.07987<br>8 | 2.01241<br>7 | 2.37353<br>7 | 2.20341<br>9 | 1.75939<br>6 | 1.40798<br>8 | 1.52728<br>0 | HMDB<br>00210 |
| pelargonate (9:0)                                          | 1.63056<br>1 | 2.12834<br>3 | 1.55376<br>9 | 1.59383<br>0 | 2.13514<br>0 | 1.84355<br>7 | 0.65436<br>1 | 0.55052<br>4 | 0.52714<br>9 | 0.36614<br>7 | 0.93444<br>4 | 1.22250<br>9 | 0.89044<br>4 | 1.30544<br>6 | 1.56577<br>2 | 1.42196<br>9 | 1.56952<br>2 | 1.79631<br>4 | HMDB<br>00847 |
| penicillin G                                               | 5.18405<br>0 | 5.90082<br>0 | 5.85872<br>7 | 3.84393<br>4 | 7.49033<br>2 | 6.62924<br>4 | 0.33722<br>0 | 0.32008<br>6 | 1.18180<br>9 | 1.16152<br>0 | 0.78647<br>8 | 0.83848<br>0 | 0.46946<br>9 | 0.77582<br>3 | 6.29200<br>3 | 2.33692<br>8 | 1.06668<br>8 | 1.60270<br>6 |               |
| pentadecanoate (15:0)                                      | 1.39382<br>9 | 1.67955<br>3 | 1.53945<br>4 | 1.05828<br>0 | 1.84687<br>8 | 1.76728<br>2 | 0.50831<br>2 | 0.44541<br>0 | 0.51889<br>6 | 0.53388<br>7 | 1.05992<br>4 | 1.18395<br>9 | 0.97676<br>1 | 1.02323<br>9 | 1.19700<br>2 | 1.54431<br>3 | 1.98263<br>7 | 1.78879<br>5 | HMDB<br>00826 |
| phenol red                                                 | 2.24587<br>0 | 2.17011<br>1 | 2.11819<br>8 | 1.53513<br>8 | 2.80363<br>5 | 2.64998<br>1 | 0.11456<br>1 | 0.12742<br>6 | 0.50787<br>9 | 0.51504<br>5 | 0.87640<br>9 | 1.12359<br>0 | 0.27461<br>9 | 0.50177<br>0 | 2.99836<br>0 | 1.23307<br>1 | 2.12705<br>1 | 2.32642<br>2 |               |

|                              |              |              |              |              |              |              |              |              |              |              |              |              |              |              |              |              |              |              |               |
|------------------------------|--------------|--------------|--------------|--------------|--------------|--------------|--------------|--------------|--------------|--------------|--------------|--------------|--------------|--------------|--------------|--------------|--------------|--------------|---------------|
| phenylacetyl glycine         | 0.34532<br>9 | 0.34532<br>9 | 0.34532<br>9 | 0.34532<br>9 | 0.34532<br>9 | 0.34532<br>9 | 0.52234<br>7 | 0.47718<br>8 | 0.72259<br>7 | 0.66725<br>1 | 2.17454<br>8 | 2.87298<br>7 | 0.34993<br>7 | 0.60908<br>6 | 1.91042<br>0 | 1.11727<br>0 | 3.39439<br>0 | 3.45789<br>7 | HMDB<br>00821 |
| phenylalanine                | 0.94308<br>0 | 1.04714<br>3 | 0.97147<br>5 | 0.67207<br>5 | 1.30705<br>7 | 1.03315<br>2 | 1.18859<br>3 | 1.01208<br>4 | 0.58568<br>5 | 0.56309<br>0 | 0.94549<br>5 | 1.06666<br>4 | 0.81969<br>2 | 1.03096<br>1 | 1.18293<br>4 | 1.05888<br>4 | 1.25043<br>7 | 1.33410<br>3 | HMDB<br>00159 |
| phosphate                    | 3.36240<br>7 | 3.89973<br>9 | 2.79766<br>2 | 2.20201<br>5 | 4.50755<br>5 | 3.91700<br>1 | 0.55410<br>7 | 0.42349<br>6 | 0.84021<br>7 | 0.87351<br>3 | 1.47813<br>5 | 1.81223<br>2 | 0.65433<br>2 | 0.77827<br>7 | 3.75177<br>2 | 1.87701<br>9 | 2.68009<br>7 | 2.55712<br>9 | HMDB<br>01429 |
| phosphoenolpyruvate (PEP)    | 7.46427<br>2 | 0.22739<br>0 | 5.48528<br>3 | 1.75714<br>9 | 3.83947<br>1 | 4.95910<br>4 | 0.95533<br>4 | 0.66890<br>3 | 2.72350<br>8 | 1.76891<br>2 | 2.86319<br>3 | 3.49938<br>6 | 0.90479<br>7 | 0.99800<br>7 | 0.22739<br>0 | 0.32414<br>6 | 0.88976<br>2 | 0.22739<br>0 | HMDB<br>00263 |
| phosphoethanolamine          | 6.38709<br>8 | 5.48399<br>8 | 6.78378<br>3 | 4.11138<br>8 | 8.36891<br>8 | 7.51334<br>4 | 0.53898<br>0 | 0.50143<br>4 | 0.09530<br>3 | 0.15022<br>5 | 0.25147<br>2 | 0.43543<br>9 | 4.38971<br>2 | 4.52685<br>7 | 3.07387<br>9 | 2.93962<br>3 | 2.56655<br>0 | 2.77200<br>9 | HMDB<br>00224 |
| phosphopantetheine           | 0.42666<br>2 | 0.42666<br>2 | 0.42666<br>2 | 0.42666<br>2 | 0.42666<br>2 | 0.42666<br>2 | 1.58300<br>7 | 1.14358<br>0 | 1.27007<br>2 | 1.00599<br>0 | 0.99401<br>0 | 1.36204<br>6 | 0.98449<br>0 | 1.06153<br>0 | 0.42666<br>2 | 0.92603<br>7 | 0.42666<br>2 | 0.94347<br>6 | HMDB<br>01416 |
| proline                      | 0.91396<br>5 | 0.73898<br>1 | 1.15285<br>9 | 0.74537<br>9 | 1.24921<br>0 | 1.00912<br>0 | 1.01080<br>0 | 0.86826<br>5 | 1.06386<br>9 | 1.11861<br>1 | 1.39493<br>1 | 1.38579<br>2 | 0.75150<br>7 | 0.89825<br>2 | 0.95737<br>1 | 0.65852<br>6 | 0.70505<br>4 | 0.76944<br>9 | HMDB<br>00162 |
| propionylcarnitine           | #####<br>##  | #####<br>##  | #####<br>##  | 9.06589<br>3 | #####<br>##  | #####<br>##  | 0.55022<br>9 | 0.44661<br>1 | 0.68977<br>5 | 0.64063<br>4 | 0.95223<br>9 | 1.62624<br>8 | 1.25322<br>2 | 1.16015<br>7 | 2.96843<br>0 | 2.05371<br>3 | 2.70977<br>1 | 2.49528<br>5 | HMDB<br>00824 |
| pseudouridine                | 1.62730<br>8 | 0.46057<br>3 | 2.34539<br>6 | 1.24654<br>0 | 2.75346<br>4 | 0.46057<br>3 | 0.60172<br>9 | 0.65430<br>2 | 0.93749<br>7 | 0.74757<br>0 | 1.19790<br>8 | 2.30028<br>3 | 0.74208<br>6 | 1.09820<br>2 | 1.54403<br>1 | 1.98894<br>2 | 1.32849<br>4 | 1.47211<br>2 | HMDB<br>00767 |
| putrescine                   | 1.32505<br>7 | 2.30952<br>9 | 1.18018<br>7 | 1.03718<br>9 | 3.01620<br>8 | 2.67260<br>3 | 4.67029<br>5 | 4.31498<br>8 | 2.82557<br>0 | 3.59259<br>9 | 1.71664<br>3 | 1.82674<br>2 | 0.49352<br>8 | 1.14387<br>3 | 1.36555<br>9 | 0.93046<br>6 | 0.17143<br>8 | 0.41107<br>7 | HMDB<br>01414 |
| pyroglutamine*               | 0.56058<br>8 | 1.57859<br>3 | 0.56058<br>8 | 2.29917<br>4 | 0.56058<br>8 | 2.41865<br>0 | 0.92979<br>0 | 0.56058<br>8 | 0.66000<br>8 | 0.76063<br>7 | 1.65414<br>6 | 1.59261<br>6 | 0.56058<br>8 | 1.06314<br>7 | 3.00424<br>6 | 0.56058<br>8 | 1.70313<br>5 | 2.10265<br>3 |               |
| pyrophosphate (PPi)          | 1.54230<br>7 | 3.52187<br>9 | 2.51364<br>4 | 3.68084<br>0 | 8.93022<br>7 | 2.51449<br>2 | 0.80981<br>7 | 0.53769<br>0 | 0.89219<br>7 | 0.61935<br>7 | 1.16635<br>2 | 0.76302<br>7 | 2.43944<br>4 | 0.65165<br>8 | 1.07631<br>5 | 1.84465<br>4 | 3.73766<br>2 | 1.64855<br>6 | HMDB<br>00250 |
| ribitol                      | 0.65411<br>7 | 2.15756<br>0 | 0.15079<br>7 | 1.29696<br>5 | 3.23617<br>2 | 1.50614<br>3 | 1.22428<br>8 | 1.17212<br>4 | 1.05683<br>8 | 1.44124<br>2 | 1.27175<br>3 | 1.59020<br>8 | 0.15079<br>7 | 0.15079<br>7 | 0.15079<br>7 | 0.15079<br>7 | 0.15079<br>7 | 0.15079<br>7 | HMDB<br>00508 |
| riboflavin (Vitamin B2)      | 0.63842<br>3 | 0.63842<br>3 | 0.63842<br>3 | 0.63842<br>3 | 0.63842<br>3 | 0.63842<br>3 | 1.24337<br>7 | 1.03855<br>7 | 0.69450<br>0 | 0.80543<br>6 | 1.83846<br>3 | 1.07191<br>3 | 1.22076<br>2 | 1.15466<br>0 | 0.63842<br>3 | 0.63842<br>3 | 2.42314<br>7 | 1.43418<br>1 | HMDB<br>00244 |
| ribose                       | 0.43873<br>6 | 0.43873<br>6 | 0.43873<br>6 | 0.43873<br>6 | 0.43873<br>6 | 0.43873<br>6 | 1.53797<br>0 | 1.02536<br>2 | 1.53694<br>2 | 2.38974<br>0 | 0.80618<br>3 | 1.44169<br>3 | 0.61057<br>2 | 1.33551<br>2 | 1.00000<br>0 | 0.43873<br>6 | 1.79106<br>6 | 0.43873<br>6 | HMDB<br>00283 |
| ribose 5-phosphate           | 1.24471<br>7 | 1.65259<br>2 | 0.97883<br>0 | 0.84279<br>8 | 2.05213<br>9 | 1.21714<br>4 | 0.68059<br>6 | 0.34693<br>1 | 1.71660<br>1 | 1.78905<br>0 | 1.61030<br>4 | 2.94279<br>9 | 0.75035<br>9 | 1.02117<br>0 | 4.96500<br>7 | 1.52407<br>8 | 2.36720<br>9 | 1.86935<br>8 | HMDB<br>00618 |
| S-adenosylhomocysteine (SAH) | 1.58586<br>7 | 1.20086<br>5 | 1.18899<br>3 | 0.89697<br>1 | 1.58887<br>1 | 1.53308<br>1 | 0.93943<br>9 | 0.77167<br>4 | 0.89523<br>6 | 0.61023<br>6 | 0.97485<br>3 | 1.35793<br>2 | 0.75752<br>5 | 1.02256<br>5 | 1.36195<br>3 | 1.28667<br>8 | 1.00397<br>3 | 0.83143<br>7 | HMDB<br>00939 |
| S-lactoylglutathione         | 0.17401<br>5 | 2.20737<br>5 | 1.22295<br>1 | 0.86755<br>7 | 1.00000<br>0 | 2.70867<br>6 | 3.27931<br>4 | 0.17401<br>1 | 1.41017<br>1 | 0.17401<br>5 | 0.17401<br>5 | HMDB<br>01066 |
| scyllo-inositol              | #####<br>##  | 7.95524<br>4 | 8.12903<br>1 | 3.64927<br>6 | #####<br>##  | 5.52198<br>3 | 0.82591<br>7 | 0.62381<br>8 | 0.52427<br>8 | 0.90227<br>3 | 0.70639<br>8 | 0.95895<br>0 | 1.00000<br>0 | 2.20061<br>7 | 1.66778<br>5 | 0.11660<br>2 | 2.89583<br>6 | 2.88614<br>0 | HMDB<br>06088 |
| sedoheptulose-7-phosphate    | 0.26162<br>4 | 0.26162<br>4 | 0.26162<br>4 | 0.26162<br>4 | 0.26162<br>4 | 0.26162<br>4 | 1.00000<br>0 | 0.72942<br>3 | 1.07632<br>7 | 1.13569<br>8 | 0.46599<br>7 | 1.54118<br>8 | 0.26162<br>4 | 0.60235<br>1 | 0.26162<br>4 | 0.84315<br>1 | 1.26418<br>9 | 1.07466<br>3 | HMDB<br>01068 |
| serine                       | 0.56394<br>5 | 1.01316<br>6 | 0.65162<br>6 | 0.41031<br>2 | 0.92230<br>1 | 0.53264<br>3 | 0.98683<br>3 | 0.74610<br>2 | 0.63680<br>7 | 0.83157<br>6 | 1.13615<br>3 | 0.88622<br>6 | 0.65020<br>3 | 0.94675<br>2 | 1.27826<br>0 | 1.11692<br>1 | 1.05696<br>2 | 1.10954<br>2 | HMDB<br>03406 |
| serotonin (5HT)              | 1.17389<br>2 | 1.77951<br>6 | 1.37488<br>5 | 0.68223<br>2 | 1.39343<br>9 | 1.74347<br>0 | 1.00396<br>8 | 0.71107<br>7 | 0.57256<br>8 | 0.55746<br>2 | 0.93695<br>8 | 1.13406<br>8 | 1.76368<br>3 | 2.22436<br>0 | 4.25371<br>6 | 4.66260<br>3 | 8.23003<br>3 | 7.55619<br>7 | HMDB<br>00259 |
| serylleucine                 | 2.10053<br>9 | 2.54252<br>7 | 2.95806<br>1 | 1.00000<br>0 | 2.22392<br>5 | 0.18277<br>7 | 1.40248<br>2 | 1.22457<br>3 | 0.18277<br>7 | 0.18277<br>7 | 0.18277<br>7 | 0.18277<br>7 | 1.03536<br>9 | 1.01753<br>6 | 0.18277<br>7 | 0.18277<br>7 | 0.18277<br>7 | 0.18277<br>7 |               |
| sorbitol                     | 1.74686<br>8 | 1.43527<br>4 | 1.39124<br>6 | 0.77230<br>5 | 3.29409<br>2 | 1.02401<br>9 | 2.98181<br>1 | 3.68107<br>2 | 2.60823<br>9 | 4.03207<br>7 | 0.97598<br>0 | 3.18552<br>4 | 0.95722<br>4 | 1.38034<br>2 | 1.99850<br>4 | 1.09036<br>8 | 0.93896<br>4 | 0.54101<br>4 | HMDB<br>00247 |
| spermidine                   | 1.56852<br>9 | 1.73716<br>7 | 1.14579<br>5 | 1.05808<br>2 | 2.45279<br>7 | 1.84917<br>7 | 9.57088<br>7 | 9.32497<br>3 | 0.61900<br>5 | 0.31846<br>0 | 0.40470<br>4 | 0.70719<br>0 | 4.99290<br>2 | 5.03627<br>6 | 1.47324<br>9 | 0.94191<br>8 | 0.38697<br>4 | 0.50210<br>7 | HMDB<br>01257 |
| spermine                     | 0.27007<br>8 | 0.27007<br>8 | 0.27007<br>8 | 0.27007<br>8 | 0.27007<br>8 | 0.27007<br>8 | 1.22042<br>3 | 1.24006<br>4 | 0.27007<br>8 | 0.27007<br>8 | 0.27007<br>8 | 0.27007<br>8 | 1.48510<br>7 | 1.41851<br>8 | 0.27007<br>8 | 0.27007<br>8 | 0.27007<br>8 | 0.27007<br>8 | HMDB<br>01256 |
| sphingosine                  | 0.21071<br>4 | 0.94326<br>1 | 0.49030<br>8 | 1.44893<br>8 | 1.13753<br>0 | 0.21071<br>4 | 0.21071<br>4 | 0.21071<br>4 | 0.21071<br>4 | 1.05673<br>9 | 1.11301<br>6 | HMDB<br>00252 |
| stearate (18:0)              | 1.60944<br>0 | 1.96617<br>7 | 2.68780<br>6 | 1.14798<br>3 | 2.36027<br>1 | 1.86579<br>5 | 0.67446<br>1 | 0.44667<br>7 | 0.68852<br>1 | 0.91978<br>5 | 1.62003<br>9 | 1.08021<br>4 | 0.77649<br>1 | 0.88257<br>3 | 2.74621<br>4 | 1.87011<br>9 | 2.37478<br>6 | 1.90340<br>5 | HMDB<br>00827 |
| stearyl sphingomyelin        | 1.92635<br>0 | 2.13213<br>6 | 1.05254<br>2 | 1.17584<br>9 | 1.32739<br>2 | 1.89682<br>4 | 0.39936<br>4 | 0.30365<br>4 | 0.22483<br>8 | 0.28042<br>6 | 0.61472<br>0 | 0.41928<br>5 | 1.58750<br>3 | 0.94745<br>8 | 0.59384<br>8 | 1.16944<br>7 | 1.91395<br>3 | 0.77290<br>0 | HMDB<br>01348 |
| streptomycin                 | 0.76277<br>3 | 0.76277<br>3 | 0.76277<br>3 | 0.76277<br>3 | 0.76277<br>3 | 0.76277<br>3 | 1.04347<br>1 | 0.95652<br>9 | 0.76277<br>3 | 0.76277<br>3 | 0.76277<br>3 | 0.76277<br>3 | 1.78464<br>9 | 1.82537<br>1 | 0.76277<br>3 | 0.76277<br>3 | 0.76277<br>3 | 0.76277<br>3 |               |



Supplemental Table 3: Glucose Metabolism qPCR Array Ct values for Figure 5A

| Gene Symbol | Naïve        | Naïve        | Naïve        | Th17         | Th17         | Th17         | Treg         | Treg         | Treg         |
|-------------|--------------|--------------|--------------|--------------|--------------|--------------|--------------|--------------|--------------|
| Acly        | 25.5130005   | 25.4979992   | 25.3199997   | 23.073       | 23.559       | 23.2649994   | 23.6210003   | 23.6009998   | 23.1930008   |
| Aco1        | 28.3640003   | 28.1509991   | 28.1389999   | 26.3390007   | 26.5440006   | 26.8619995   | 26.2390003   | 26.2140007   | 26.3460007   |
| Aco2        | 26.5179996   | 26.3600006   | 26.2420006   | 24.9659996   | 25.2619991   | 25.3010006   | 24.7199993   | 24.4920006   | 24.6669998   |
| Agl         | 31.0990009   | 31.3069992   | 30.7549992   | 27.3689995   | 27.7350006   | 27.1700001   | 28.8649998   | 28.7049999   | 28.4029999   |
| Aldoa       | 23.2600002   | 23.2670002   | 23.2479992   | 18.4349995   | 18.7439995   | 18.2320004   | 20.5629997   | 20.0370007   | 19.9829998   |
| Aldob       | 37.1409988   | 32.3730011   | Undetermined | 37.6549988   | 32.598999    | Undetermined | Undetermined | 37.4290009   | 35.4430008   |
| Aldoc       | 31.2049999   | 31.3519993   | 30.8729992   | 22.6760006   | 22.5860004   | 21.9890003   | 27.1060009   | 25.9960003   | 25.9220009   |
| Bpgm        | 28.2970009   | 28.3799992   | 28.0599995   | 26.9599991   | 26.7290001   | 26.4309998   | 26.1170006   | 25.6790009   | 25.4979992   |
| Cs          | 31.3069992   | 31.7299995   | 30.8710003   | 28.3269997   | 29.0849991   | 29.2679996   | 29.1599998   | 28.8339996   | 28.8719997   |
| Dlat        | 28.2919998   | 28.0450001   | 28.1089993   | 26.5839996   | 26.7950001   | 26.4500008   | 26.5620003   | 26.2970009   | 26.0300007   |
| Dld         | 27.3110008   | 27.2889996   | 26.7800007   | 25.5170002   | 25.3169994   | 25.2989998   | 25.3080006   | 24.9109993   | 24.7719994   |
| Dlst        | 26.2059994   | 26.0310001   | 25.8239994   | 24.8150005   | 25.177       | 24.8470001   | 24.4239998   | 24.5359993   | 24.4169998   |
| Eno1        | 23.2099991   | 23.1119995   | 23.0499992   | 19.2819996   | 19.4400005   | 19.3150005   | 20.4209995   | 19.9920006   | 20.1240005   |
| Eno2        | 35.7280006   | 34.0680008   | 33.5750008   | 29.9960003   | 28.9839993   | 29.3369999   | 30.7380009   | 29.7460003   | 29.8850002   |
| Eno3        | 29.0109997   | 28.7159996   | 28.7280006   | 28.8859997   | 28.3719997   | 27.9279995   | 27.1049995   | 26.6790009   | 26.2660007   |
| Fbp1        | 34.3330002   | 34.8709984   | 34.4350014   | 34.5419998   | 32.8330002   | 33.5849991   | 32.6689987   | 33.4420013   | 34.2529984   |
| Fbp2        | Undetermined |
| Fh1         | 27.6049995   | 27.2889996   | 27.4029999   | 25.5079994   | 25.7460003   | 25.8400002   | 25.6210003   | 25.4470005   | 25.2649994   |
| G6pc        | 34.8540001   | 39.6080017   | 37.5489998   | Undetermined | 38.0410004   | 35.6529999   | Undetermined | 36.8740005   | 33.3829994   |
| G6pc3       | 27.8859997   | 28.0219994   | 27.9200001   | 27.0380001   | 26.8600006   | 26.8789997   | 26.9729996   | 26.9160004   | 26.882       |
| G6pdx       | 27.3080006   | 27.2420006   | 27.0760002   | 25.4659996   | 25.5830002   | 25.0650005   | 25.9799995   | 25.5109997   | 25.1340008   |
| Galm        | 28.9029999   | 28.9419994   | 28.7479992   | 25.9920006   | 25.9209995   | 25.8059998   | 25.5620003   | 25.0849991   | 25.125       |
| Gapdhs      | 33.1730003   | 33.5880013   | 33.4620018   | 35.1650009   | 34.3660011   | 34.3139992   | 35.1559982   | 34.8359985   | 34.8959999   |
| Gbe1        | 27.7029991   | 27.9619999   | 27.4589996   | 25.4729996   | 25.9599991   | 25.2849998   | 28.5389996   | 28.4009991   | 28.0620003   |
| Gck         | Undetermined |
| Gpi1        | 24.3600006   | 24.2509995   | 24.0219994   | 21.1509991   | 21.1879997   | 20.7199993   | 22.3649998   | 21.8129997   | 21.7229996   |
| Gsk3a       | 25.9899998   | 25.9039993   | 25.8299999   | 24.9349995   | 25.4150009   | 24.7579994   | 24.9379997   | 24.5990009   | 24.3360004   |

Supplemental Table 3: Glucose Metabolism qPCR Array Ct values for Figure 5A

|       |              |              |              |              |              |              |              |              |              |
|-------|--------------|--------------|--------------|--------------|--------------|--------------|--------------|--------------|--------------|
| Gsk3b | 26.3059998   | 26.0629997   | 25.9139996   | 24.7539997   | 25.2019997   | 24.9689999   | 24.5610008   | 24.823       | 24.5349998   |
| Gys1  | 29.2789993   | 29.3349991   | 28.9279995   | 24.9710007   | 24.9349995   | 24.9750004   | 27.1919994   | 26.6490002   | 26.9559994   |
| Gys2  | Undetermined | Undetermined | 33.4599991   | Undetermined | Undetermined | Undetermined | Undetermined | Undetermined | Undetermined |
| H6pd  | 27.1459999   | 27.1270008   | 26.8600006   | 25.9920006   | 26.2339993   | 26.1030006   | 25.9950008   | 25.9629993   | 25.8719997   |
| Hk2   | 32.118       | 32.2169991   | 31.8810005   | 25.1280003   | 25.3309994   | 25.3250008   | 26.1730003   | 26.2380009   | 26.4659996   |
| Hk3   | 32.0289993   | 32.2599983   | 31.2609997   | 32.9990005   | 33.980999    | 32.5130005   | 32.3370018   | 32.8110008   | 32.1679993   |
| Idh1  | 29.6149998   | 29.4290009   | 29.1030006   | 26.9060001   | 26.7549992   | 26.9370003   | 28.1830006   | 27.5869999   | 27.5909996   |
| Idh2  | 26.0839996   | 26.1040001   | 25.9629993   | 25.5949993   | 25.5629997   | 25.1049995   | 25.5799999   | 25.3799992   | 25.1369991   |
| Idh3a | 26.6189995   | 26.5559998   | 26.3810005   | 25.698       | 25.2679996   | 25.1079998   | 25.2840004   | 24.2719994   | 24           |
| Idh3b | 25.2989998   | 25.2049999   | 24.9309998   | 23.6210003   | 23.9330006   | 23.5130005   | 23.5419998   | 23.3980007   | 23.1560001   |
| Idh3g | 25.0650005   | 25.0620003   | 24.8780003   | 23.2140007   | 23.9139996   | 23.1429996   | 23.2110004   | 23.5970001   | 23.1299992   |
| Mdh1  | 25.9009991   | 25.7810001   | 25.5440006   | 23.9669991   | 23.8859997   | 23.4920006   | 24.0820007   | 23.5119991   | 23.2520008   |
| Mdh1b | Undetermined | 38.362999    | Undetermined |
| Mdh2  | 24.9470005   | 24.8470001   | 24.7299995   | 23.0799999   | 23.1639996   | 23.007       | 23.0279999   | 22.6940002   | 22.5249996   |
| Ogdh  | 24.9190006   | 25.0160007   | 24.6539993   | 24.9619999   | 24.1200008   | 23.8139992   | 24.8659992   | 23.6720009   | 23.3990002   |
| Pck1  | Undetermined | Undetermined | Undetermined | Undetermined | 37.9959984   | 31.7959995   | Undetermined | 34.3050003   | Undetermined |
| Pck2  | 27.7709999   | 27.9349995   | 28.0960007   | 25.6259995   | 25.4169998   | 25.0230007   | 26.5699997   | 26.0240002   | 25.8290005   |
| Pcx   | 30.2900009   | 30.7420006   | 30.3470001   | 25.7259998   | 25.868       | 25.2150002   | 28.1690006   | 27.7929993   | 27.3239994   |
| Pdha1 | 25.9050007   | 25.9080009   | 25.7169991   | 24.2900009   | 24.2560005   | 24.2180004   | 23.9969997   | 23.6800003   | 23.8199997   |
| Pdhb  | 26.3379993   | 26.1930008   | 26.0960007   | 24.8869991   | 24.9549999   | 24.7140007   | 24.6130009   | 24.316       | 24.1599998   |
| Pdk1  | 25.6079998   | 25.5990009   | 25.0569992   | 24.5680008   | 24.0489998   | 24.3339996   | 26.2749996   | 25.3199997   | 25.9559994   |
| Pdk2  | 32.512001    | 33.7179985   | 33.3950005   | 30.0060005   | 32.0530014   | 31.3059998   | 31.382       | 32.118       | 31.0680008   |
| Pdk3  | 28.2059994   | 28.2099991   | 28.0569992   | 24.4990005   | 25.2579994   | 25.0349998   | 25.0639992   | 25.4640007   | 25.2310009   |
| Pdk4  | 32.7519989   | 34.3880005   | 32.1660004   | 32.2019997   | 32.973999    | 34.6310005   | 34.8320007   | 32.7599983   | 34.269001    |
| Pdp2  | 28.1159992   | 28.1060009   | 27.9769993   | 26.9169998   | 27.1410007   | 26.9650002   | 27.9619999   | 27.6900005   | 27.6100006   |
| Pdpr  | 29.3010006   | 28.934       | 28.8939991   | 27.7700005   | 27.4669991   | 27.2670002   | 27.0550003   | 26.9330006   | 26.5949993   |
| Pfkl  | 26.4440002   | 26.3110008   | 26.1459999   | 22.9839993   | 22.8040009   | 22.6359997   | 24.7390003   | 23.6800003   | 23.9829998   |
| Pgam2 | 29.0319996   | 28.4069996   | 28.6590004   | 28.5389996   | 28.5459995   | 28.2749996   | 27.5380001   | 27.9029999   | 27.941       |

Supplemental Table 3: Glucose Metabolism qPCR Array Ct values for Figure 5A

|        |              |              |              |              |              |              |              |              |              |
|--------|--------------|--------------|--------------|--------------|--------------|--------------|--------------|--------------|--------------|
| Pgk1   | 25.1800003   | 24.8490009   | 24.6019993   | 19.0879993   | 19.4650002   | 19.1790009   | 21.0680008   | 20.7630005   | 20.9020004   |
| Pgk2   | Undetermined |
| Pgm1   | 26.8239994   | 27.177       | 26.9220009   | 24.809       | 24.9090004   | 25.1229992   | 24.9650002   | 24.9979992   | 24.9680004   |
| Pgm2   | 28.4899998   | 28.4169998   | 28.198       | 24.0249996   | 24.5009995   | 24.1089993   | 26.4050007   | 26.2870007   | 26.1940002   |
| Pgm3   | 29.5610008   | 29.4720001   | 29.4960003   | 29.1259995   | 28.8449993   | 28.2730007   | 28.0480003   | 27.8560009   | 27.7689991   |
| Phka1  | 32.2050018   | 32.6650009   | 31.6049995   | 34.2809982   | 33.4480019   | 35.9780006   | 34.9729996   | 34.4370003   | 32.7669983   |
| Phkb   | 29.1049995   | 29.0119991   | 29.0020008   | 28.066       | 27.8360004   | 27.4209995   | 27.5230007   | 27.3260002   | 26.9230003   |
| Phkg1  | 31.4139996   | 30.9500008   | 30.2740002   | 33.7200012   | 33.5950012   | 32.2869987   | 31.5149994   | 30.5139999   | 31.1200008   |
| Phkg2  | 26.5400009   | 26.4349995   | 26.2770004   | 25.7800007   | 25.6860008   | 25.2999992   | 25.8050003   | 25.3850002   | 25.1350002   |
| Pklr   | 27.6399994   | 27.8460007   | 28.8889999   | Undetermined | 34.4980011   | Undetermined | 34.1119995   | Undetermined | 34.0009995   |
| Prps1  | 25.6110001   | 25.8659992   | 25.4850006   | 24.3999996   | 24.4500008   | 24.3129997   | 24.2929993   | 24.2040005   | 23.9669991   |
| Prps11 | 34.2529984   | Undetermined | 34.5089989   | Undetermined | Undetermined | Undetermined | Undetermined | Undetermined | Undetermined |
| Prps2  | 26.1159992   | 26.2169991   | 26.0499992   | 25.493       | 25.8889999   | 25.3910007   | 24.9920006   | 24.9279995   | 24.8269997   |
| Pygl   | 31.0690002   | 31.2180004   | 31.7679996   | 27.4050007   | 27.9060001   | 27.0569992   | 29.9810009   | 29.8969994   | 29.8050003   |
| Pygm   | 29.0310001   | 29.1229992   | 28.8269997   | 30.882       | 30.9810009   | 30.2560005   | 29.8439999   | 30.1229992   | 29.2709999   |
| Rbks   | 28.6970005   | 28.3349991   | 28.4009991   | 27.5380001   | 27.507       | 27.3889999   | 27.4519997   | 27.1709995   | 27.0189991   |
| Rpe    | 26.3959999   | 26.3400002   | 26.1000004   | 25.0249996   | 25.5020008   | 25.2749996   | 24.8050003   | 24.9939995   | 24.7959995   |
| Rpia   | 26.8169994   | 26.8799992   | 26.6040001   | 25.4419994   | 25.6200008   | 25.7240009   | 25.1580009   | 25.0799999   | 25.1620007   |
| Sdha   | 25.4169998   | 25.4009991   | 25.1340008   | 24.2390003   | 24.4120007   | 24.2180004   | 24.0459995   | 23.684       | 23.4729996   |
| Sdhb   | 26.2560005   | 26.2240009   | 26.1369991   | 24.5170002   | 24.6329994   | 24.8209991   | 24.2950001   | 24.132       | 24.1879997   |
| Sdhc   | 25.6599998   | 25.8929996   | 25.6310005   | 24.0849991   | 24.5820007   | 24.0739994   | 24.2789993   | 24.1270008   | 23.9109993   |
| Sdhd   | 30.9330006   | 30.7619991   | 30.2299995   | 28.7539997   | 28.9920006   | 28.9400005   | 28.6259995   | 28.2670002   | 28.1480007   |
| Sucla2 | 27.6749992   | 27.9370003   | 27.5610008   | 25.9200001   | 25.8999996   | 25.5580006   | 25.6159992   | 25.3600006   | 25.0189991   |
| Suclg1 | 28.7929993   | 29.0540009   | 28.3899994   | 27.3139992   | 26.5949993   | 26.3929996   | 27.4260006   | 25.618       | 25.9750004   |
| Suclg2 | 26.9029999   | 26.9169998   | 26.5970001   | 26.6459999   | 26.8759995   | 26.6790009   | 26.4029999   | 26.2380009   | 26.0559998   |
| Taldo1 | 28.1679993   | 28.1270008   | 28.4190006   | 27.1119995   | 28.2730007   | 27.3309994   | 26.9239998   | 28.1439991   | 26.6879997   |
| Tkt    | 24.7439995   | 24.7709999   | 24.7849998   | 22.3220005   | 22.2600002   | 22.0410004   | 22.9790001   | 22.3209991   | 22.3400002   |
| Tpi1   | 27.0709991   | 27.1450005   | 27.5489998   | 21.1140003   | 20.9729996   | 21.2600002   | 23.0130005   | 22.4510002   | 22.9440002   |

Supplemental Table 3: Glucose Metabolism qPCR Array Ct values for Figure 5A

|          |              |              |              |              |            |              |              |            |              |
|----------|--------------|--------------|--------------|--------------|------------|--------------|--------------|------------|--------------|
| Ugp2     | 27.5949993   | 27.0709991   | 26.9419994   | 25.5410004   | 25.309     | 25.2630005   | 25.493       | 25.1380005 | 25.0510006   |
| Actb     | 19.0370007   | 19.1490002   | 18.5909996   | 17.8610001   | 18.0919991 | 17.7000008   | 17.6200008   | 17.2010002 | 17.0400009   |
| B2m      | 21.1580009   | 21.0440006   | 20.8250008   | 20.2819996   | 20.5760002 | 20.2719994   | 20.4230003   | 20.2900009 | 20.191       |
| Gapdh    | 22.934       | 22.9890003   | 22.8339996   | 18.5779991   | 18.052     | 17.7490005   | 20.2619991   | 18.9610004 | 19.2910004   |
| Gusb     | 27.9360008   | 27.9979992   | 27.882       | 26.9850006   | 27.316     | 27.2719994   | 26.5419998   | 26.4769993 | 26.2870007   |
| Hsp90ab1 | 22.2329998   | 22.1380005   | 22.118       | 20.3460007   | 20.4009991 | 20.2150002   | 20.7070007   | 20.3430004 | 20.3840008   |
| MGDC     | Undetermined | Undetermined | Undetermined | Undetermined | 39.3790016 | Undetermined | Undetermined | 39.1310005 | Undetermined |
| RTC      | 23.2199993   | 23.3059998   | 22.7819996   | 22.5860004   | 22.5680008 | 22.2530003   | 22.6389999   | 22.1429996 | 22.4029999   |
| RTC      | 23.1879997   | 23.0949993   | 22.7280006   | 22.7439995   | 22.3500004 | 22.2520008   | 22.5879993   | 22.1459999 | 22.3540001   |
| Tbp      | 26.9150009   | 26.9039993   | 26.9080009   | 26.2479992   | 25.9720001 | 26.2019997   | 26.1259995   | 25.618     | 25.8040009   |
| PPC      | 20.1560001   | 20.7119999   | 20.4699993   | 20.7800007   | 20.9209995 | 21.0039997   | 20.7450008   | 21.0020008 | 20.7299995   |
| PPC      | 20.4860001   | 20.7639999   | 20.4750004   | 20.6130009   | 21.2789993 | 20.6940002   | 20.4990005   | 21.0820007 | 20.5550003   |
| PPC      | 20.3540001   | 20.6809998   | 20.8010006   | 20.7250004   | 21.5620003 | 20.7859993   | 20.6590004   | 21.0440006 | 20.5930004   |

Supplemental Table 4: Mitochondrial Metabolism qPCR Array Ct values for Figure 5D

| Gene Symbol | Naive        | Naive        | Naive        | Naive        | Th17         | Th17         | Th17         | Treg         | Treg         | Treg         |
|-------------|--------------|--------------|--------------|--------------|--------------|--------------|--------------|--------------|--------------|--------------|
| Atp12a      | Undetermined |
| Atp4a       | 33.8269997   | 33.8619995   | 33.1520004   | Undetermined | 34.3089981   | 31.8999996   | 34.2070007   | 34.9949989   | 34.6469994   | Undetermined |
| Atp4b       | 34.8689995   | 34.7939987   | 35.8880005   | 38.9280014   | 34.4480019   | 35.4980011   | 31.8460007   | 35.2169991   | 34.9959984   | 33.8889999   |
| Atp5a1      | 23.6919994   | 23.9060001   | 23.2520008   | 39.3110008   | 22.5990009   | 22.5410004   | 22.8619995   | 22.302       | 22.3080006   | 21.9029999   |
| Atp5b       | 23.368       | 23.1620007   | 22.9869995   | 38.1599998   | 22.1749992   | 22.0610008   | 22.4190006   | 21.9370003   | 21.9039993   | 21.3490009   |
| Atp5c1      | 24.6849995   | 24.4860001   | 24.2649994   | 38.4700012   | 23.1359997   | 23.1599998   | 23.1410007   | 23.0130005   | 23.1030006   | 22.5629997   |
| Atp5d       | 24.9589996   | 24.8320007   | 24.7329998   | Undetermined | 23.0820007   | 22.9729996   | 22.9780006   | 23.4890003   | 23.2390003   | 22.8430004   |
| Atp5f1      | 24.125       | 23.9860001   | 23.677       | 39.6619987   | 22.5960007   | 22.5249996   | 22.9519997   | 22.4519997   | 22.2539997   | 21.9510002   |
| Atp5g1      | 24.9419994   | 24.7439995   | 24.7269993   | 37.9290009   | 24.2350006   | 23.9680004   | 24.3470001   | 23.5049992   | 23.3659992   | 23.125       |
| Atp5g2      | 24.5559998   | 24.3810005   | 23.9969997   | Undetermined | 23.0450001   | 23.0690002   | 23.073       | 22.7059994   | 22.8519993   | 22.4020004   |
| Atp5g3      | 24.4029999   | 23.9130001   | 23.8649998   | Undetermined | 22.1779995   | 22.1499996   | 22.6959991   | 21.9109993   | 21.9640007   | 21.7029991   |
| Atp5h       | 23.7399998   | 23.3990002   | 23.0699997   | 37.0159988   | 22.3209991   | 22.2089996   | 22.1790009   | 21.9890003   | 21.8810005   | 21.191       |
| Atp5j       | 24.5900002   | 24.2029991   | 23.9880009   | Undetermined | 22.8799992   | 22.0139999   | 22.8479996   | 22.4619999   | 21.9519997   | 21.9960003   |
| Atp5j2      | 24.493       | 24.5389996   | 24.2350006   | Undetermined | 22.7789993   | 22.6450005   | 22.9440002   | 22.5160007   | 22.2849998   | 21.9659996   |
| Atp5o       | 25.2229996   | 25.0489998   | 24.6040001   | Undetermined | 23.7929993   | 23.8610001   | 23.9839993   | 23.6790009   | 23.6639996   | 23.1760006   |
| Atp6v0a2    | 26.059       | 25.7630005   | 25.2849998   | Undetermined | 25.7719994   | 25.7210007   | 25.9650002   | 25.0020008   | 25.0459995   | 24.6949997   |
| Atp6v0d2    | 32.6549988   | 32.1300011   | 31.8990002   | Undetermined | 24.3369999   | 24.3980007   | 24.7929993   | 26.2940006   | 26.0900002   | 26.4650002   |
| Atp6v1c2    | 32.9609985   | 31.9069996   | 32.3199997   | Undetermined | 32.6269989   | 32.9939995   | 34.0449982   | 31.9419994   | 34.8610001   | 33.9959984   |
| Atp6v1e2    | Undetermined | 34.7340012   | Undetermined |
| Atp6v1g3    | 35.4090004   | 36.1809998   | 34.2900009   | Undetermined | 35.4529991   | 35.5139999   | 35.6329994   | 34.6860008   | 38.1020012   | 31.7399998   |
| Bcs1l       | 28.5410004   | 28.5760002   | 28.2549992   | Undetermined | 27.8780003   | 27.9570007   | 27.8959999   | 28.1340008   | 28.0380001   | 27.4810009   |
| Cox11       | 29.9839993   | 29.7940006   | 29.3059998   | Undetermined | 29.8339996   | 29.3799992   | 29.6520004   | 29.9820004   | 29.6459999   | 29.2099991   |
| Cox4i1      | 23.6299992   | 23.4829998   | 23.1450005   | Undetermined | 22.1189995   | 22.2150002   | 22.3659992   | 22.0270004   | 22.1849995   | 21.7080002   |
| Cox4i2      | Undetermined | 32.4830017   | 34.5289993   | Undetermined | 28.7099991   | 28.8129997   | 28.2679996   | 33.7550011   | 32.8440018   | 31.5799999   |
| Cox5a       | 25.5189991   | 25.0090008   | 24.8509998   | Undetermined | 23.6019993   | 23.0580006   | 23.6450005   | 23.4920006   | 22.9689999   | 22.9969997   |
| Cox5b       | 32.6199989   | 32.5680008   | 33.1570015   | Undetermined | 31.7259998   | 32.8790016   | 31.5330009   | 30.7089996   | 31.7159996   | 30.3770008   |
| Cox6a1      | 23.8719997   | 23.3920002   | 23.2520008   | Undetermined | 22.0909996   | 21.9430008   | 22.3290005   | 21.9120007   | 21.9349995   | 21.3419991   |



Supplemental Table 4: Mitochondrial Metabolism qPCR Array Ct values for Figure 5D

|         |            |              |            |              |            |              |              |            |            |              |
|---------|------------|--------------|------------|--------------|------------|--------------|--------------|------------|------------|--------------|
| Cox6a2  | 35.6990013 | 35.5060005   | 35.3209991 | Undetermined | 33.401001  | 33.118       | 34.1189995   | 39.2150002 | 35.3860016 | Undetermined |
| Cox6b1  | 24.7639999 | 24.368       | 24.2660007 | Undetermined | 23.2460003 | 22.7700005   | 23.0380001   | 22.9549999 | 22.4290009 | 22.0990009   |
| Cox6b2  | 28.3959999 | 28.2740002   | 29.0760002 | Undetermined | 29.3239994 | 29.1210003   | 29.6369991   | 28.9689999 | 29.1420002 | 29.1119995   |
| Cox6c   | 24.7549992 | 24.2619991   | 24.0410004 | Undetermined | 22.4209995 | 22.1310005   | 22.6310005   | 22.1259995 | 22.0779991 | 21.7320004   |
| Cox7a2  | 33.8380013 | 32.5709991   | 32.8849983 | Undetermined | 33.4910011 | 33.5159988   | 33.3429985   | 33.0060005 | 33.9329987 | 32.9620018   |
| Cox7a2l | 24.2420006 | 23.8799992   | 23.3889999 | Undetermined | 22.9750004 | 22.9610004   | 22.8899994   | 22.7259998 | 22.7189999 | 22.1289997   |
| Cox7b   | 26.2709999 | 26.1669998   | 25.9589996 | 39.0270004   | 24.5650005 | 24.316       | 24.7029991   | 24.323     | 23.9220009 | 23.7040005   |
| Cox8a   | 26.0230007 | 26.2870007   | 25.7600002 | Undetermined | 24.1499996 | 24.1049995   | 24.7029991   | 23.8670006 | 23.8670006 | 23.6809998   |
| Cox8c   | 38.6240005 | Undetermined | 30.8239994 | 38.3429985   | 38.9500008 | Undetermined | Undetermined | 35.7459984 | 38.0089989 | 36.4469986   |
| Cyc1    | 26.1490002 | 25.8759995   | 25.7439995 | 39.1220016   | 25.3600006 | 24.9279995   | 25.1119995   | 25.0990009 | 24.7870007 | 24.0550003   |
| Lhpp    | 29.243     | 28.8540001   | 28.7709999 | Undetermined | 29.3320007 | 29.7269993   | 29.6709995   | 28.9130001 | 29.2469997 | 28.2390003   |
| Ndufa1  | 25.9710007 | 25.4430008   | 25.2089996 | Undetermined | 24.1100006 | 23.368       | 24.1240005   | 23.6469994 | 23.2660007 | 23.0380001   |
| Ndufa10 | 25.6350002 | 25.4580002   | 25.0979996 | Undetermined | 24.6630001 | 24.7070007   | 24.9680004   | 24.0480003 | 24.1650009 | 23.5939999   |
| Ndufa11 | 26.1420002 | 25.8059998   | 25.8190002 | 39.3510017   | 24.3850002 | 24.5389996   | 24.6690006   | 23.9769993 | 23.9640007 | 23.8929996   |
| Ndufa2  | 26.6849995 | 26.5410004   | 26.1800003 | Undetermined | 25.1399994 | 25.0970001   | 25.3190002   | 24.8279991 | 24.8659992 | 24.3400002   |
| Ndufa3  | 25.1860008 | 25.2229996   | 24.7970009 | Undetermined | 24.243     | 23.5410004   | 24.066       | 23.8729992 | 23.4020004 | 23.2059994   |
| Ndufa4  | 24.3369999 | 24.0909996   | 23.7409992 | Undetermined | 23.5410004 | 23.1060009   | 23.6720009   | 22.6679993 | 22.4330006 | 22.1240005   |
| Ndufa5  | 26.7910004 | 26.3560009   | 26.1669998 | Undetermined | 25.7840004 | 25.1369991   | 26.0690002   | 25.1009998 | 24.9699993 | 24.7140007   |
| Ndufa6  | 24.3150005 | 24.0900002   | 23.7339993 | Undetermined | 22.9629993 | 22.8239994   | 22.8570004   | 23.0939999 | 23.0890007 | 22.5060005   |
| Ndufa7  | 25.7070007 | 25.3939991   | 25.198     | Undetermined | 23.9920006 | 23.5149994   | 23.6860008   | 23.7770004 | 23.5139999 | 22.993       |
| Ndufa8  | 25.8330002 | 25.6000004   | 25.3980007 | Undetermined | 24.3439999 | 23.8509998   | 24.1490002   | 24.118     | 23.7240009 | 23.5090008   |
| Ndufab1 | 31.198     | 30.9659996   | 30.9720001 | Undetermined | 31.0049992 | 31.1790009   | 31.2730007   | 30.9599991 | 31.2119999 | 30.6720009   |
| Ndufb10 | 26.5799999 | 26.3279991   | 26.5750008 | Undetermined | 25.8279991 | 25.9650002   | 25.6189995   | 25.9839993 | 25.8279991 | 25.6469994   |
| Ndufb2  | 26.9009991 | 26.4559994   | 26.2450008 | Undetermined | 25.3869991 | 24.8479996   | 25.1949997   | 25.073     | 24.5119991 | 24.1359997   |
| Ndufb3  | 26.9080009 | 26.0400009   | 26.1650009 | Undetermined | 25.6720009 | 25.2250004   | 25.5039997   | 25.1720009 | 24.8630009 | 24.6790009   |
| Ndufb4  | 24.8010006 | 24.2180004   | 24.2229996 | 35.4500008   | 25.3099995 | 24.9969997   | 25.4060001   | 24.9039993 | 24.6630001 | 23.9880009   |
| Ndufb5  | 26.243     | 25.927       | 25.493     | Undetermined | 24.4920006 | 24.4360008   | 24.6000004   | 24.0109997 | 24.2259998 | 23.8740005   |
| Ndufb6  | 26.9850006 | 26.3950005   | 26.4549999 | Undetermined | 24.9610004 | 24.6350002   | 24.9160004   | 24.5529995 | 24.2339993 | 24.073       |

Supplemental Table 4: Mitochondrial Metabolism qPCR Array Ct values for Figure 5D

|         |            |            |            |              |            |            |            |            |            |            |
|---------|------------|------------|------------|--------------|------------|------------|------------|------------|------------|------------|
| Ndufb7  | 25.559     | 25.4360008 | 25.2010002 | Undetermined | 24.3239994 | 24.0820007 | 24.5130005 | 23.9510002 | 23.882     | 23.5130005 |
| Ndufb8  | 25.3390007 | 25.2110004 | 24.9120007 | Undetermined | 23.4239998 | 23.3689995 | 23.8419991 | 23.1970005 | 23.3419991 | 22.9009991 |
| Ndufb9  | 25.2280006 | 25.1219997 | 25.1299992 | Undetermined | 23.3640003 | 22.9430008 | 23.4969997 | 23.1940002 | 23.184     | 22.7959995 |
| Ndufc1  | 27.5170002 | 27.1919994 | 26.8929996 | Undetermined | 25.302     | 24.5340004 | 25.1410007 | 24.9890003 | 24.5319996 | 24.2660007 |
| Ndufc2  | 26.0639992 | 25.8169994 | 25.8129997 | Undetermined | 23.9869995 | 23.7950001 | 24.0030003 | 23.9659996 | 23.9190006 | 23.4680004 |
| Ndufs1  | 27.1819992 | 26.7530003 | 26.5130005 | Undetermined | 26.0900002 | 25.9039993 | 26.3810005 | 25.5809994 | 25.5760002 | 25.4130001 |
| Ndufs2  | 25.6860008 | 25.5039997 | 25.0100002 | Undetermined | 23.7649994 | 23.7439995 | 23.8899994 | 23.6760006 | 23.5709991 | 23.2900009 |
| Ndufs3  | 25.7719994 | 25.302     | 24.9699993 | Undetermined | 24.3169994 | 24.1779995 | 24.3689995 | 24.1140003 | 24.066     | 23.5830002 |
| Ndufs4  | 26.8269997 | 26.1590004 | 25.9750004 | Undetermined | 24.8990002 | 24.7770004 | 24.8339996 | 25.0820007 | 24.8080006 | 24.0830002 |
| Ndufs5  | 26.4589996 | 25.625     | 25.6350002 | Undetermined | 24.6359997 | 24.0569992 | 24.2520008 | 24.2679996 | 23.8579998 | 23.3969994 |
| Ndufs6  | 25.9799995 | 25.7660007 | 25.5310001 | Undetermined | 24.2210007 | 23.7870007 | 23.9249992 | 23.9820004 | 23.5330009 | 23.1359997 |
| Ndufs7  | 25.7859993 | 25.7040005 | 25.6879997 | Undetermined | 25.2970009 | 25.1399994 | 25.2229996 | 25.0330009 | 25.0419998 | 24.7810001 |
| Ndufs8  | 26.9729996 | 26.9190006 | 27.0960007 | Undetermined | 25.9640007 | 25.5739994 | 25.691     | 25.9659996 | 25.3689995 | 25.6170006 |
| Ndufv1  | 26.6490002 | 26.1870003 | 26.0869999 | Undetermined | 25.493     | 25.2220001 | 25.7269993 | 25.0970001 | 24.8320007 | 24.7509995 |
| Ndufv2  | 26.2409992 | 25.9489994 | 25.8610001 | Undetermined | 24.8120003 | 24.2420006 | 24.2250004 | 24.7999992 | 24.184     | 23.7140007 |
| Ndufv3  | 26.3059998 | 26.0599995 | 25.8309994 | Undetermined | 23.2670002 | 22.9589996 | 23.1900005 | 24.2460003 | 23.9659996 | 23.7220001 |
| Oxa1l   | 26.5559998 | 26.1469994 | 25.9559994 | Undetermined | 25.6429996 | 25.9239998 | 25.8729992 | 25.6809998 | 25.7290001 | 25.2479992 |
| Ppa1    | 27.8689995 | 27.3889999 | 27.3120003 | Undetermined | 26.4720001 | 26.1550007 | 26.6609993 | 25.8099995 | 25.5540009 | 25.0039997 |
| Ppa2    | 27.3449993 | 26.8829994 | 26.4939995 | Undetermined | 25.9489994 | 25.6089993 | 25.9860001 | 25.6270008 | 25.4090004 | 24.8840008 |
| Sdha    | 25.3519993 | 25.0049992 | 24.802     | Undetermined | 24.552     | 24.3969994 | 24.9039993 | 24.0949993 | 24.2360001 | 23.7700005 |
| Sdhb    | 26.5960007 | 26.3659992 | 26.2759991 | Undetermined | 24.9440002 | 24.8339996 | 25.1439991 | 24.7169991 | 24.368     | 24.125     |
| Sdhc    | 25.7740002 | 25.7259998 | 25.5860004 | Undetermined | 24.3239994 | 24.6469994 | 24.7059994 | 24.2159996 | 24.2560005 | 23.9979992 |
| Sdhd    | 30.9220009 | 30.3619995 | 30.3689995 | Undetermined | 29.0209999 | 28.6970005 | 29.3840008 | 28.4349995 | 28.2439995 | 28.1030006 |
| Uqcr11  | 28.5760002 | 28.2859993 | 28.0739994 | Undetermined | 26.9790001 | 26.9459991 | 27.2029991 | 26.6410007 | 26.4120007 | 26.2630005 |
| Uqcrc1  | 24.5149994 | 24.3969994 | 24.1380005 | Undetermined | 23.4540005 | 23.5060005 | 23.5970001 | 23.2000008 | 23.2049999 | 22.6690006 |
| Uqcrc2  | 25.632     | 25.4459991 | 25.4029999 | Undetermined | 24.3110008 | 24.0860004 | 24.3099995 | 24.2719994 | 24.0219994 | 23.8789997 |
| Uqcrcs1 | 25.1870003 | 24.7390003 | 24.4090004 | Undetermined | 22.9669991 | 23.1459999 | 23.3920002 | 22.9909992 | 23.184     | 22.9599991 |
| Uqcrcs2 | 27.6110001 | 27.1870003 | 26.8910007 | 38.1500015   | 25.8460007 | 25.7439995 | 26.0860004 | 25.177     | 25.2129993 | 24.7619991 |

Supplemental Table 4: Mitochondrial Metabolism qPCR Array Ct values for Figure 5D

|          |              |              |              |              |              |              |              |              |              |              |
|----------|--------------|--------------|--------------|--------------|--------------|--------------|--------------|--------------|--------------|--------------|
| Uqcrg    | 25.8509998   | 25.4080009   | 25.3899994   | Undetermined | 24.073       | 23.7929993   | 24.2129993   | 23.8959999   | 23.5400009   | 23.2549992   |
| Actb     | 19.1569996   | 19.0109997   | 18.4680004   | Undetermined | 18.2250004   | 18.0629997   | 18.3309994   | 17.7870007   | 17.6450005   | 17.3990002   |
| B2m      | 21.1989994   | 20.3460007   | 19.9939995   | 39.5680008   | 20.6830006   | 20.4430008   | 20.7660007   | 20.6219997   | 20.4249992   | 20.2479992   |
| Gapdh    | 23.7679996   | 23.4610004   | 23.0380001   | Undetermined | 18.7350006   | 18.6100006   | 18.8589993   | 20.2709999   | 19.9699993   | 19.5970001   |
| Gusb     | 28.0030003   | 27.8859997   | 27.7460003   | Undetermined | 27.368       | 27.0699997   | 27.7290001   | 26.8409996   | 26.2950001   | 25.9769993   |
| Hsp90ab1 | 22.5569992   | 22.2740002   | 22.1019993   | Undetermined | 20.7660007   | 20.6690006   | 20.875       | 20.9629993   | 20.9829998   | 20.5499992   |
| MGDC     | Undetermined |
| RTC      | 23.1329994   | 22.7350006   | 22.198       | Undetermined | 22.5629997   | 22.3950005   | 22.7369995   | 22.4290009   | 22.368       | 22.4290009   |
| RTC      | 23.0419998   | 22.6709995   | 22.2469997   | Undetermined | 22.5990009   | 22.5219994   | 22.8810005   | 22.4559994   | 22.4150009   | 22.507       |
| Tbp      | 27.0060005   | 26.5300007   | 26.4440002   | Undetermined | 26.4139996   | 25.9810009   | 26.5139999   | 25.9960003   | 25.9799995   | 26.0039997   |
| PPC      | 20.9190006   | 20.9680004   | 20.6189995   | 20.3239994   | 20.9160004   | 20.8850002   | 20.9470005   | 20.8010006   | 20.6130009   | 20.7830009   |
| PPC      | 20.6380005   | 20.8659992   | 20.5559998   | 20.3850002   | 20.9850006   | 20.7800007   | 20.8449993   | 20.8150005   | 20.7709999   | 20.4500008   |
| PPC      | 20.7329998   | 20.8390007   | 20.6959991   | 20.4829998   | 21.0930004   | 21.0450001   | 20.9360008   | 20.7169991   | 20.7520008   | 20.5090008   |

Supplemental Table 5: T cell Metabolism qPCR Array Ct values for Supplemental Figure 6

| Gene symbol | naïve | naïve | Th1   | Th1   | Th17  | Th17  | Th17      | Treg  | Treg  |
|-------------|-------|-------|-------|-------|-------|-------|-----------|-------|-------|
| Slc7a5      | 25.69 | 25.80 | 24.54 | 24.65 | 24.97 | 25.92 | 24.634396 | 25.48 | 25.61 |
| Slc3a2      | 24.69 | 23.81 | 23.51 | 23.54 | 23.39 | 23.86 | 23.690067 | 23.94 | 24.11 |
| Phgdh       | 26.22 | 25.81 | 25.73 | 25.91 | 25.31 | 26.27 | 24.980423 | 25.69 | 25.66 |
| Gls         | 24.04 | 23.30 | 23.56 | 23.51 | 23.18 | 23.48 | 23.675243 | 23.25 | 23.45 |
| Gls2        | 30.01 | 30.47 | 29.80 | 29.84 | 25.90 | 25.75 | 26.57876  | 28.96 | 28.99 |
| Got2        | 23.96 | 23.42 | 22.35 | 22.48 | 21.71 | 22.11 | 22.016165 | 22.30 | 22.28 |
| Glud1       | 24.14 | 23.33 | 22.88 | 22.92 | 21.66 | 21.88 | 22.035048 | 22.16 | 22.27 |
| Odc1        | 23.78 | 23.32 | 20.80 | 20.90 | 20.56 | 21.02 | 20.986616 | 21.03 | 20.99 |
| Gapdh       | 21.90 | 21.30 | 19.21 | 19.33 | 17.44 | 17.67 | 17.953527 | 19.43 | 19.14 |
| Pfas        | 26.17 | 25.83 | 26.12 | 26.25 | 25.71 | 26.22 | 25.049198 | 25.58 | 25.53 |
| Pck2        | 25.87 | 25.69 | 25.37 | 25.44 | 24.07 | 24.39 | 25.043112 | 25.55 | 25.52 |
| Pdk1        | 24.88 | 24.00 | 24.92 | 25.11 | 22.99 | 23.65 | 24.821732 | 25.14 | 25.11 |
| Pdk3        | 26.44 | 25.77 | 24.97 | 24.94 | 23.51 | 23.88 | 23.920898 | 24.44 | 24.41 |
| Pdp2        | 26.78 | 26.19 | 26.34 | 26.01 | 25.49 | 25.90 | 25.705465 | 26.72 | 26.97 |
| Pdpr        | 28.09 | 27.18 | 26.79 | 26.83 | 26.36 | 26.57 | 26.961267 | 26.35 | 26.44 |
| Pfkfb3      | 29.42 | 28.99 | 28.88 | 28.94 | 28.68 | 28.89 | 28.986393 | 29.26 | 29.29 |
| Slc2a1      | 26.89 | 26.09 | 24.13 | 24.36 | 23.03 | 23.50 | 23.263779 | 24.91 | 24.96 |
| Slc2a3      | 26.69 | 26.23 | 23.24 | 23.38 | 21.64 | 21.61 | 24.313131 | 25.60 | 25.55 |
| Slc2a6      | 28.70 | 28.83 | 26.59 | 26.49 | 25.01 | 25.59 | 25.74978  | 25.13 | 25.15 |
| Gys1        | 27.80 | 27.40 | 26.61 | 26.59 | 23.83 | 24.07 | 24.992134 | 26.35 | 26.25 |
| Pnp         | 25.00 | 24.70 | 24.24 | 24.26 | 24.00 | 24.68 | 23.637732 | 24.55 | 24.40 |
| Pygl        | 29.33 | 28.54 | 29.25 | 29.05 | 26.16 | 25.98 | 28.014265 | 29.26 | 29.13 |
| Ppat        | 25.91 | 25.26 | 25.84 | 25.76 | 25.65 | 26.13 | 24.980137 | 25.50 | 25.47 |
| Cad         | 25.20 | 24.78 | 25.43 | 25.68 | 25.26 | 26.17 | 24.35022  | 24.87 | 24.70 |
| Phkg2       | 25.44 | 25.20 | 24.99 | 24.81 | 24.67 | 24.73 | 25.203356 | 24.73 | 24.94 |
| Aldoa       | 22.21 | 21.68 | 19.67 | 19.77 | 17.98 | 18.11 | 18.811472 | 20.26 | 20.05 |
| Ada         | 27.84 | 27.63 | 28.24 | 28.30 | 28.96 | 29.43 | 28.31427  | 28.30 | 27.98 |
| Eno1        | 22.06 | 21.48 | 20.27 | 20.45 | 18.40 | 18.84 | 18.881927 | 20.11 | 19.88 |

Supplemental Table 5: T cell Metabolism qPCR Array Ct values for Supplemental Figure 6

|       |              |              |              |              |              |              |              |              |              |
|-------|--------------|--------------|--------------|--------------|--------------|--------------|--------------|--------------|--------------|
| Eno2  | 33.00        | 31.04        | 30.14        | 30.17        | 28.36        | 28.29        | 30.009653    | 29.68        | 30.15        |
| Eno3  | 27.87        | 27.10        | 27.66        | 27.73        | 27.64        | 27.80        | 27.897144    | 26.20        | 26.46        |
| Gpi1  | 22.91        | 22.35        | 21.29        | 21.41        | 20.03        | 20.07        | 20.950727    | 21.64        | 21.54        |
| Hk2   | 30.58        | 29.47        | 24.63        | 24.83        | 24.52        | 24.96        | 24.504145    | 26.01        | 26.06        |
| Hk3   | 29.10        | 29.02        | 30.79        | 30.83        | 31.99        | 32.56        | 33.097363    | 32.53        | 32.30        |
| Pfkl  | 24.98        | 24.61        | 23.90        | 23.97        | 21.78        | 22.10        | 22.314909    | 23.66        | 23.56        |
| Pgam2 | 28.23        | 27.76        | 27.65        | 27.42        | 27.88        | 27.86        | 29.176302    | 27.61        | 27.79        |
| Pgk1  | 23.99        | 23.25        | 21.00        | 21.16        | 18.60        | 18.91        | 19.46935     | 20.97        | 20.78        |
| Pgk2  | Undetermined |
| Pgm1  | 25.76        | 25.17        | 25.12        | 25.25        | 24.53        | 24.77        | 25.03659     | 25.03        | 25.08        |
| Pgm2  | 27.39        | 26.96        | 25.59        | 25.64        | 23.22        | 23.39        | 24.429161    | 25.96        | 25.75        |
| Pgm3  | 28.72        | 27.51        | 27.73        | 27.90        | 27.31        | 27.80        | 27.52053     | 26.99        | 27.33        |
| Pklr  | 26.36        | 26.91        | Undetermined | Undetermined | Undetermined | Undetermined | Undetermined | 34.77        | 36.58        |
| Tpi1  | 26.23        | 25.95        | 22.97        | 23.37        | 20.80        | 21.22        | 20.917797    | 23.20        | 22.80        |
| Hk1   | 24.29        | 23.86        | 23.28        | 23.46        | 21.66        | 21.98        | 22.551363    | 23.33        | 23.26        |
| Pgam1 | 25.29        | 24.59        | 22.65        | 22.79        | 20.63        | 20.88        | 21.190928    | 22.53        | 22.40        |
| Abca1 | 27.16        | 26.20        | 27.18        | 27.10        | 27.56        | 27.55        | 27.735128    | 26.32        | 26.47        |
| Apoe  | 25.57        | 25.28        | 28.85        | 28.43        | 28.95        | 28.62        | 28.680513    | 27.99        | 28.27        |
| Fabp5 | 26.35        | 26.31        | 24.77        | 24.80        | 23.23        | 23.89        | 22.865398    | 22.85        | 22.72        |
| Cpt1a | 24.99        | 25.02        | 25.63        | 25.70        | 25.56        | 25.82        | 26.439365    | 25.29        | 25.46        |
| Fasn  | 23.69        | 23.33        | 22.99        | 23.05        | 22.08        | 22.52        | 21.973028    | 23.02        | 22.86        |
| Acaca | 27.23        | 26.19        | 25.19        | 25.32        | 25.09        | 25.51        | 25.213793    | 25.51        | 25.53        |
| Nampt | 26.23        | 25.24        | 25.11        | 25.10        | 23.57        | 23.88        | 23.972778    | 25.00        | 24.98        |
| G6pdx | 26.42        | 25.34        | 25.11        | 25.17        | 24.38        | 24.73        | 24.576538    | 25.04        | 25.03        |
| Pkm   | 22.32        | 21.91        | 19.92        | 20.10        | 18.18        | 18.63        | 19.106892    | 20.21        | 19.95        |
| Prps1 | 25.46        | 24.41        | 24.39        | 24.61        | 23.90        | 24.27        | 23.627214    | 24.17        | 24.20        |
| Prps2 | 25.49        | 24.78        | 24.90        | 24.92        | 24.91        | 25.26        | 25.098734    | 24.83        | 24.72        |
| Rbks  | 27.00        | 26.96        | 26.29        | 26.19        | 26.98        | 27.32        | 26.549116    | 27.00        | 27.02        |

Supplemental Table 5: T cell Metabolism qPCR Array Ct values for Supplemental Figure 6

|         |       |       |       |       |       |       |           |       |       |
|---------|-------|-------|-------|-------|-------|-------|-----------|-------|-------|
| Rpia    | 24.41 | 24.03 | 24.71 | 24.63 | 24.43 | 24.72 | 24.035124 | 24.61 | 24.47 |
| Taldo1  | 27.04 | 27.01 | 27.11 | 25.43 | 27.00 | 27.79 | 27.459816 | 27.20 | 27.04 |
| Tkt     | 22.99 | 22.61 | 21.94 | 21.98 | 23.38 | 21.39 | 21.308762 | 21.96 | 21.87 |
| Pgd     | 24.89 | 24.53 | 24.08 | 24.38 | 23.31 | 23.78 | 23.707796 | 24.33 | 24.18 |
| Pcx     | 29.37 | 29.19 | 28.41 | 28.52 | 25.12 | 25.22 | 25.366539 | 27.59 | 27.42 |
| Ldha    | 21.84 | 21.37 | 20.27 | 20.38 | 18.72 | 19.20 | 18.896986 | 19.87 | 19.66 |
| Slc16a1 | 27.72 | 26.94 | 26.48 | 26.37 | 26.06 | 26.52 | 26.143938 | 26.95 | 26.80 |
| Me2     | 25.07 | 24.40 | 25.08 | 25.22 | 23.34 | 23.59 | 24.135546 | 24.65 | 24.72 |
| Acly    | 24.43 | 23.42 | 23.12 | 23.08 | 22.45 | 22.95 | 22.689234 | 23.16 | 23.12 |
| Aco1    | 27.45 | 27.04 | 26.40 | 26.53 | 25.98 | 26.41 | 26.285929 | 26.42 | 26.45 |
| Aco2    | 25.06 | 24.66 | 24.71 | 24.75 | 24.06 | 24.58 | 23.889244 | 24.01 | 23.97 |
| Cs      | 29.83 | 29.22 | 28.36 | 28.94 | 28.09 | 28.63 | 28.41055  | 28.65 | 28.56 |
| Dlat    | 26.97 | 26.10 | 26.42 | 26.36 | 25.73 | 26.11 | 25.997734 | 26.01 | 25.98 |
| Dld     | 26.37 | 25.45 | 25.31 | 25.24 | 25.13 | 25.47 | 24.703274 | 24.81 | 25.01 |
| Dlst    | 24.10 | 23.52 | 23.59 | 23.55 | 23.54 | 23.71 | 23.27473  | 23.46 | 23.52 |
| Fh1     | 25.00 | 24.71 | 24.82 | 24.93 | 24.11 | 24.65 | 23.776833 | 24.35 | 24.26 |
| ldh1    | 28.80 | 27.61 | 27.22 | 27.07 | 26.10 | 26.35 | 26.949442 | 27.66 | 27.56 |
| ldh2    | 24.11 | 24.00 | 24.57 | 24.60 | 24.32 | 24.40 | 25.318464 | 24.75 | 24.83 |
| ldh3a   | 26.04 | 24.83 | 24.45 | 24.41 | 24.60 | 25.36 | 24.125422 | 24.24 | 24.16 |
| Mdh1    | 24.52 | 23.67 | 23.61 | 23.56 | 22.79 | 23.28 | 23.495216 | 23.28 | 23.15 |
| Mdh2    | 23.84 | 23.31 | 23.19 | 22.99 | 22.79 | 23.26 | 22.79984  | 23.09 | 23.04 |
| Ogdh    | 24.20 | 23.48 | 23.44 | 23.44 | 23.51 | 23.84 | 23.937874 | 23.79 | 23.75 |
| Pdha1   | 24.61 | 23.70 | 24.03 | 23.99 | 23.12 | 23.49 | 23.722767 | 23.22 | 23.28 |
| Pdhb    | 25.17 | 24.31 | 24.55 | 24.74 | 24.03 | 24.49 | 24.29106  | 24.21 | 24.27 |
| Sdha    | 23.45 | 23.25 | 23.06 | 23.07 | 22.60 | 22.90 | 22.87806  | 22.70 | 22.73 |
| Sdhb    | 24.70 | 24.41 | 23.91 | 23.91 | 23.55 | 23.95 | 23.467802 | 23.68 | 23.66 |
| Sdhc    | 24.26 | 23.87 | 23.98 | 23.99 | 23.39 | 23.72 | 23.485441 | 23.70 | 23.76 |
| Sdhd    | 28.72 | 28.68 | 27.96 | 28.16 | 27.82 | 28.22 | 27.579449 | 27.66 | 28.05 |

Supplemental Table 5: T cell Metabolism qPCR Array Ct values for Supplemental Figure 6

|        |              |              |              |              |              |              |              |              |              |
|--------|--------------|--------------|--------------|--------------|--------------|--------------|--------------|--------------|--------------|
| Sucla2 | 25.69        | 25.11        | 24.93        | 24.81        | 24.24        | 24.64        | 24.669216    | 24.37        | 24.53        |
| Suclg1 | 26.85        | 23.50        | 26.06        | 25.81        | 25.55        | 25.74        | 23.492407    | 25.54        | 25.63        |
| Suclg2 | 26.15        | 25.41        | 26.73        | 26.89        | 26.11        | 26.74        | 25.90316     | 26.24        | 26.25        |
| Sod2   | 25.18        | 25.02        | 24.91        | 24.95        | 24.38        | 24.90        | 23.78847     | 24.67        | 24.75        |
| Tfrc   | 27.68        | 26.46        | 25.56        | 25.62        | 23.69        | 24.62        | 22.33322     | 23.95        | 23.72        |
| Actb   | 18.28        | 17.48        | 17.07        | 17.20        | 17.03        | 17.63        | 17.464876    | 17.00        | 17.00        |
| B2m    | 19.72        | 18.51        | 18.11        | 18.00        | 19.15        | 19.59        | 19.332092    | 19.36        | 19.53        |
| MGDC   | Undetermined |
| RTC    | 21.97        | 22.39        | 22.26        | 22.39        | 22.10        | 22.35        | 22.024311    | 22.44        | 22.51        |
| RTC    | 22.00        | 22.54        | 22.39        | 22.51        | 22.27        | 22.47        | 22.159761    | 22.60        | 22.62        |
| PPC    | 22.39        | 21.94        | 21.43        | 21.29        | 21.66        | 21.37        | 21.1523      | 21.41        | 21.54        |
| PPC    | 22.03        | 21.60        | 21.12        | 20.98        | 21.20        | 21.01        | 20.679144    | 20.96        | 21.06        |
